# Supplementary material
Source: publisher figshare collection journal article supplement (https://acs.figshare.com/ndownloader/files/3844648)
Supplement: Supplementary file 1 [file 3844648]

## Sheet: PNF
Protein name	Protein accession numbers	Protein identification probability	Exclusive unique peptide count	Exclusive unique spectrum count	Total spectrum count	Percentage sequence coverage
Cytoskeleton-associated protein 5	CKAP5_HUMAN	1	1	1	1	0.00541
Heterogeneous nuclear ribonucleoprotein A1	ROA1_HUMAN	1	8	10	14	0.261
Acetyl-CoA acetyltransferase, mitochondrial	THIL_HUMAN	1	7	8	13	0.239
DNA replication licensing factor MCM7	MCM7_HUMAN	1	9	12	14	0.192
ATP-binding cassette sub-family E member 1	ABCE1_HUMAN	1	3	3	3	0.105
60S ribosomal protein L3	RL3_HUMAN	1	8	10	13	0.31
Prelamin-A/C	LMNA_HUMAN	1	2	2	2	0.0361
DNA replication licensing factor MCM6	MCM6_HUMAN	1	8	9	13	0.141
Glutamate dehydrogenase 1, mitochondrial	DHE3_HUMAN	1	6	6	7	0.172
Neutral amino acid transporter B(0)	AAAT_HUMAN	1	6	9	23	0.172
Succinate dehydrogenase [ubiquinone] flavoprotein subunit, mitochondrial	DHSA_HUMAN	1	3	4	4	0.0572
Nucleolin	NUCL_HUMAN	1	16	19	49	0.225
Proteasome-associated protein ECM29 homolog	ECM29_HUMAN	1	3	3	3	0.0331
Heterogeneous nuclear ribonucleoprotein U-like protein 1	HNRL1_HUMAN	1	3	3	5	0.0596
Importin-7	IPO7_HUMAN	1	7	8	19	0.117
Kinectin	KTN1_HUMAN	1	2	2	2	0.0184
Elongation factor 2	EF2_HUMAN	1	33	47	131	0.549
Adenine phosphoribosyltransferase	APT_HUMAN	1	4	5	16	0.383
Voltage-dependent anion-selective channel protein 2	VDAC2_HUMAN	1	3	3	4	0.136
Keratin, type II cytoskeletal 8	K2C8_HUMAN	1	17	23	52	0.453
Ubiquitin-conjugating enzyme E2 L3	UB2L3_HUMAN	1	2	2	4	0.24
40S ribosomal protein S4, X isoform	RS4X_HUMAN	1	7	8	25	0.376
Keratin, type I cytoskeletal 19	K1C19_HUMAN	1	7	8	18	0.298
Unconventional myosin-Id	MYO1D_HUMAN	1	5	5	5	0.0646
Ras-related protein Rab-1B	RAB1B_HUMAN	1	2	3	10	0.348
Unconventional myosin-Ic	MYO1C_HUMAN	1	10	11	25	0.162
Sodium bicarbonate cotransporter 3	S4A7_HUMAN	1	1	1	1	0.014
Transcription factor BTF3	BTF3_HUMAN	1	4	5	9	0.34
Dynamin-1-like protein	DNM1L_HUMAN	1	3	3	3	0.0652
40S ribosomal protein S3	RS3_HUMAN	1	13	16	38	0.588
4-hydroxyphenylpyruvate dioxygenase-like protein	HPDL_HUMAN	1	2	2	2	0.105
Interleukin enhancer-binding factor 2	ILF2_HUMAN	1	4	5	6	0.149
S-formylglutathione hydrolase	ESTD_HUMAN	1	3	3	3	0.22
Wolframin	WFS1_HUMAN	1	2	2	2	0.027
GTP:AMP phosphotransferase, mitochondrial	KAD3_HUMAN	1	2	2	2	0.101
Cathepsin D	CATD_HUMAN	1	7	9	14	0.216
NAD(P)H dehydrogenase [quinone] 1	NQO1_HUMAN	1	2	2	2	0.113
cAMP-dependent protein kinase type II-alpha regulatory subunit	KAP2_HUMAN	1	6	7	10	0.2
Pre-mRNA-processing factor 40 homolog A	PR40A_HUMAN	1	3	3	4	0.046
Atlastin-2	ATLA2_HUMAN	1	3	3	4	0.0738
Creatine kinase B-type	KCRB_HUMAN	1	5	5	5	0.22
Protein disulfide-isomerase A3	PDIA3_HUMAN	1	12	14	20	0.358
Exportin-1	XPO1_HUMAN	1	7	7	7	0.105
DnaJ homolog subfamily A member 2	DNJA2_HUMAN	1	2	2	2	0.051
Phosphoglycerate mutase 1	PGAM1_HUMAN	1	5	6	23	0.327
DnaJ homolog subfamily A member 1	DNJA1_HUMAN	1	4	4	5	0.219
Cathepsin Z	CATZ_HUMAN	1	3	3	4	0.125
Tropomyosin alpha-3 chain	TPM3_HUMAN	1	3	3	3	0.081
BAG family molecular chaperone regulator 2	BAG2_HUMAN	1	3	3	3	0.223
Rab GDP dissociation inhibitor beta	GDIB_HUMAN	1	9	13	26	0.238
40S ribosomal protein S14	RS14_HUMAN	1	6	8	11	0.384
40S ribosomal protein S13	RS13_HUMAN	1	4	7	22	0.331
Tubulin beta-4B chain	TBB4B_HUMAN	1	1	1	130	0.715
Splicing factor U2AF 65 kDa subunit	U2AF2_HUMAN	1	2	2	2	0.0737
Ataxin-2-like protein	ATX2L_HUMAN	1	2	2	2	0.0167
Heterogeneous nuclear ribonucleoproteins A2/B1	ROA2_HUMAN	1	10	13	23	0.391
Calmodulin	CALM_HUMAN	1	4	6	22	0.617
60S ribosomal protein L22	RL22_HUMAN	1	3	4	7	0.391
Actin-related protein 3	ARP3_HUMAN	1	4	4	7	0.215
Alpha-actinin-1	ACTN1_HUMAN	1	12	12	102	0.373
Proteasomal ubiquitin receptor ADRM1	ADRM1_HUMAN	1	2	2	2	0.0614
60S ribosomal protein L4	RL4_HUMAN	1	14	17	35	0.382
Coatomer subunit gamma-1	COPG1_HUMAN	1	4	5	6	0.0778
Actin-related protein 2	ARP2_HUMAN	1	2	2	2	0.122
Mitochondrial import receptor subunit TOM20 homolog	TOM20_HUMAN	1	2	2	3	0.345
Calponin-2	CNN2_HUMAN	1	8	10	14	0.427
Aconitate hydratase, mitochondrial	ACON_HUMAN	1	2	2	4	0.0538
Malate dehydrogenase, mitochondrial	MDHM_HUMAN	1	14	19	68	0.556
Proteasome subunit alpha type-1	PSA1_HUMAN	1	4	5	5	0.194
Nucleosome assembly protein 1-like 1	NP1L1_HUMAN	1	3	5	10	0.143
UTP--glucose-1-phosphate uridylyltransferase	UGPA_HUMAN	1	2	2	2	0.0787
Myosin regulatory light chain 12A	ML12A_HUMAN	1	9	10	17	0.626
Fragile X mental retardation syndrome-related protein 1	FXR1_HUMAN	1	5	5	10	0.11
28S ribosomal protein S9, mitochondrial	RT09_HUMAN	1	3	3	3	0.106
FACT complex subunit SPT16	SP16H_HUMAN	1	2	2	2	0.0363
Porphobilinogen deaminase	HEM3_HUMAN	1	2	2	2	0.0776
Putative pre-mRNA-splicing factor ATP-dependent RNA helicase DHX15	DHX15_HUMAN	1	3	3	3	0.0553
Bifunctional purine biosynthesis protein PURH	PUR9_HUMAN	1	17	18	24	0.426
Citrate synthase, mitochondrial	CISY_HUMAN	1	13	16	29	0.457
Nucleolar RNA helicase 2	DDX21_HUMAN	1	6	7	12	0.112
RNA-binding protein FUS	FUS_HUMAN	1	3	3	10	0.0856
Ras GTPase-activating protein-binding protein 2	G3BP2_HUMAN	1	2	2	2	0.0456
Chromobox protein homolog 3	CBX3_HUMAN	1	3	3	4	0.224
Ras GTPase-activating protein-binding protein 1	G3BP1_HUMAN	1	9	10	14	0.307
Phosphoglycerate kinase 1	PGK1_HUMAN	1	13	20	46	0.463
ATP synthase subunit alpha, mitochondrial	ATPA_HUMAN	1	17	24	55	0.432
Glutamine--tRNA ligase	SYQ_HUMAN	1	2	2	2	0.0452
Ras GTPase-activating-like protein IQGAP1	IQGA1_HUMAN	1	5	5	6	0.0465
CD9 antigen	CD9_HUMAN	1	2	4	17	0.154
Quinone oxidoreductase	QOR_HUMAN	1	2	2	2	0.0699
40S ribosomal protein S16	RS16_HUMAN	1	9	9	20	0.514
Myosin-9	MYH9_HUMAN	1	37	46	102	0.319
D-3-phosphoglycerate dehydrogenase	SERA_HUMAN	1	9	10	19	0.276
Enhancer of rudimentary homolog	ERH_HUMAN	1	2	2	2	0.269
Protein S100-A4	S10A4_HUMAN	1	2	3	5	0.188
Sorbin and SH3 domain-containing protein 1	SRBS1_HUMAN	1	3	3	3	0.0348
Actin-related protein 2/3 complex subunit 4	ARPC4_HUMAN	1	2	2	2	0.131
40S ribosomal protein SA	RSSA_HUMAN	1	12	15	24	0.58
Heat shock protein 105 kDa	HS105_HUMAN	1	21	24	41	0.395
Hsc70-interacting protein	F10A1_HUMAN	1	1	1	1	0.0379
Eukaryotic translation initiation factor 4 gamma 2	IF4G2_HUMAN	1	3	3	5	0.0463
Fatty acyl-CoA reductase 1	FACR1_HUMAN	1	2	2	2	0.0757
Long-chain-fatty-acid--CoA ligase 4	ACSL4_HUMAN	1	3	3	4	0.097
Moesin	MOES_HUMAN	1	5	5	14	0.206
Eukaryotic translation initiation factor 4 gamma 1	IF4G1_HUMAN	1	8	8	11	0.0663
Protein disulfide-isomerase A4	PDIA4_HUMAN	1	3	3	4	0.0558
Perilipin-3	PLIN3_HUMAN	1	2	2	2	0.0599
Heterogeneous nuclear ribonucleoprotein Q	HNRPQ_HUMAN	1	7	12	43	0.222
Exportin-2	XPO2_HUMAN	1	18	21	32	0.297
Serine/threonine-protein kinase PAK 4	PAK4_HUMAN	1	2	2	2	0.0778
Transformer-2 protein homolog beta	TRA2B_HUMAN	1	1	1	1	0.0486
Signal recognition particle receptor subunit beta	SRPRB_HUMAN	1	2	2	2	0.0738
Clathrin heavy chain 1	CLH1_HUMAN	1	40	52	123	0.474
Polypyrimidine tract-binding protein 1	PTBP1_HUMAN	1	7	7	10	0.298
40S ribosomal protein S15	RS15_HUMAN	1	4	7	16	0.552
U5 small nuclear ribonucleoprotein 200 kDa helicase	U520_HUMAN	1	11	14	19	0.0857
Hydroxyacyl-coenzyme A dehydrogenase, mitochondrial	HCDH_HUMAN	1	6	7	11	0.395
Cytochrome b-c1 complex subunit 1, mitochondrial	QCR1_HUMAN	1	7	7	9	0.248
Heat shock protein 75 kDa, mitochondrial	TRAP1_HUMAN	1	10	10	13	0.244
Ubiquitin carboxyl-terminal hydrolase 14	UBP14_HUMAN	1	2	2	2	0.0587
Guanine nucleotide-binding protein G(i) subunit alpha-2	GNAI2_HUMAN	1	3	3	9	0.273
ADP/ATP translocase 3	ADT3_HUMAN	1	3	4	17	0.419
Gem-associated protein 5	GEMI5_HUMAN	1	2	2	2	0.0133
60S ribosomal protein L23	RL23_HUMAN	1	7	9	20	0.521
Eukaryotic translation initiation factor 4B	IF4B_HUMAN	1	8	10	12	0.162
ADP/ATP translocase 2	ADT2_HUMAN	1	4	5	15	0.399
Sarcoplasmic/endoplasmic reticulum calcium ATPase 2	AT2A2_HUMAN	1	5	5	5	0.0681
60S ribosomal protein L6	RL6_HUMAN	1	9	12	21	0.347
Glucosidase 2 subunit beta	GLU2B_HUMAN	1	2	2	2	0.0398
Lysosomal Pro-X carboxypeptidase	PCP_HUMAN	1	2	2	2	0.0806
60S ribosomal protein L5	RL5_HUMAN	1	8	11	35	0.357
Mitochondrial import receptor subunit TOM22 homolog	TOM22_HUMAN	1	3	3	6	0.338
Actin filament-associated protein 1-like 2	AF1L2_HUMAN	1	2	3	4	0.0403
Ras-related protein Rab-6A	RAB6A_HUMAN	1	1	1	4	0.12
Plasminogen activator inhibitor 1	PAI1_HUMAN	1	2	2	2	0.0672
Very-long-chain enoyl-CoA reductase	TECR_HUMAN	1	2	2	5	0.0617
Tubulin beta-2B chain	TBB2B_HUMAN	1	1	2	100	0.596
28S ribosomal protein S35, mitochondrial	RT35_HUMAN	1	1	1	2	0.031
Proteasome subunit alpha type-2	PSA2_HUMAN	1	5	5	8	0.355
NADH dehydrogenase [ubiquinone] 1 alpha subcomplex subunit 13	NDUAD_HUMAN	1	3	4	9	0.257
LETM1 and EF-hand domain-containing protein 1, mitochondrial	LETM1_HUMAN	1	2	2	2	0.0325
Cytosolic acyl coenzyme A thioester hydrolase	BACH_HUMAN	1	3	3	3	0.1
Na(+)/H(+) exchange regulatory cofactor NHE-RF1	NHRF1_HUMAN	1	3	3	4	0.112
Microtubule-actin cross-linking factor 1, isoforms 1/2/3/5	MACF1_HUMAN	1	5	5	5	0.0133
Sorcin	SORCN_HUMAN	1	2	2	2	0.116
rRNA 2'-O-methyltransferase fibrillarin	FBRL_HUMAN	1	2	2	3	0.162
Nucleophosmin	NPM_HUMAN	1	6	12	54	0.289
Splicing factor 3A subunit 1	SF3A1_HUMAN	1	4	4	4	0.0794
Electron transfer flavoprotein subunit alpha, mitochondrial	ETFA_HUMAN	1	8	9	17	0.408
39S ribosomal protein L19, mitochondrial	RM19_HUMAN	1	2	2	2	0.0788
Retinol-binding protein 1	RET1_HUMAN	1	5	5	5	0.511
Solute carrier family 2, facilitated glucose transporter member 1	GTR1_HUMAN	1	6	8	18	0.163
Leucine--tRNA ligase, cytoplasmic	SYLC_HUMAN	1	6	6	7	0.0765
TAR DNA-binding protein 43	TADBP_HUMAN	1	4	4	5	0.229
ATP synthase subunit beta, mitochondrial	ATPB_HUMAN	1	18	27	88	0.561
Ras GTPase-activating-like protein IQGAP2	IQGA2_HUMAN	1	5	6	7	0.061
40S ribosomal protein S7	RS7_HUMAN	1	6	9	30	0.438
Band 4.1-like protein 2	E41L2_HUMAN	1	2	2	2	0.0299
GrpE protein homolog 1, mitochondrial	GRPE1_HUMAN	1	2	2	2	0.0968
Transferrin receptor protein 1	TFR1_HUMAN	1	7	8	9	0.121
40S ribosomal protein S6	RS6_HUMAN	1	6	7	17	0.301
Coiled-coil domain-containing protein 47	CCD47_HUMAN	1	2	2	2	0.06
Heat shock protein HSP 90-alpha	HS90A_HUMAN	1	26	45	241	0.53
Protein mago nashi homolog 2	MGN2_HUMAN	1	2	2	2	0.142
Biliverdin reductase A	BIEA_HUMAN	1	3	3	3	0.189
SPRY domain-containing protein 4	SPRY4_HUMAN	1	2	2	2	0.222
Neutral alpha-glucosidase AB	GANAB_HUMAN	1	10	10	14	0.194
ATP-dependent RNA helicase DDX1	DDX1_HUMAN	1	8	8	13	0.15
Dihydropyrimidinase-related protein 2	DPYL2_HUMAN	1	4	4	5	0.147
Calcium-binding mitochondrial carrier protein Aralar2	CMC2_HUMAN	1	15	19	27	0.421
Adenosylhomocysteinase	SAHH_HUMAN	1	13	15	25	0.438
Nuclear autoantigenic sperm protein	NASP_HUMAN	1	5	5	7	0.131
Hepatoma-derived growth factor	HDGF_HUMAN	1	2	2	2	0.112
Protein disulfide-isomerase A6	PDIA6_HUMAN	1	4	6	21	0.15
Serine/threonine-protein phosphatase PGAM5, mitochondrial	PGAM5_HUMAN	1	2	2	2	0.0657
Splicing factor 3B subunit 1	SF3B1_HUMAN	1	11	12	18	0.146
Thioredoxin domain-containing protein 5	TXND5_HUMAN	1	4	4	5	0.113
Serpin H1	SERPH_HUMAN	1	7	8	11	0.294
Barrier-to-autointegration factor	BAF_HUMAN	1	1	1	1	0.27
Ribosomal L1 domain-containing protein 1	RL1D1_HUMAN	1	3	4	12	0.0939
40S ribosomal protein S17-like	RS17L_HUMAN	1	5	6	7	0.489
Calreticulin	CALR_HUMAN	1	5	6	11	0.249
Mitochondrial-processing peptidase subunit alpha	MPPA_HUMAN	1	2	3	14	0.0895
GTPase KRas	RASK_HUMAN	1	1	1	4	0.28
Cytochrome b-c1 complex subunit 2, mitochondrial	QCR2_HUMAN	1	6	6	6	0.203
Vimentin	VIME_HUMAN	1	28	43	150	0.71
AP-2 complex subunit beta	AP2B1_HUMAN	1	1	1	3	0.0843
Tyrosine--tRNA ligase, mitochondrial	SYYM_HUMAN	1	2	2	2	0.0587
Poly(rC)-binding protein 2	PCBP2_HUMAN	1	6	7	26	0.427
60S ribosomal protein L8	RL8_HUMAN	1	5	7	8	0.3
60S ribosomal protein L24	RL24_HUMAN	1	4	4	8	0.255
Alpha-actinin-4	ACTN4_HUMAN	1	29	45	216	0.618
60S ribosomal protein L7	RL7_HUMAN	1	9	11	27	0.347
Insulin-like growth factor 2 mRNA-binding protein 2	IF2B2_HUMAN	1	3	3	5	0.0935
Signal recognition particle 9 kDa protein	SRP09_HUMAN	1	2	2	3	0.256
Cleavage and polyadenylation specificity factor subunit 6	CPSF6_HUMAN	1	2	2	3	0.0708
Elongation factor 1-alpha 1	EF1A1_HUMAN	1	9	16	132	0.582
Lanosterol 14-alpha demethylase	CP51A_HUMAN	1	2	2	2	0.0437
Cleavage and polyadenylation specificity factor subunit 5	CPSF5_HUMAN	1	3	4	6	0.229
Glutaminase kidney isoform, mitochondrial	GLSK_HUMAN	1	6	6	8	0.138
NADH dehydrogenase [ubiquinone] flavoprotein 1, mitochondrial	NDUV1_HUMAN	1	2	2	2	0.0711
ATPase family AAA domain-containing protein 3A	ATD3A_HUMAN	1	1	2	4	0.0394
Nucleosome assembly protein 1-like 4	NP1L4_HUMAN	1	2	3	8	0.115
ATP-dependent RNA helicase DDX39A	DX39A_HUMAN	1	2	2	14	0.255
Proteasome subunit alpha type-3	PSA3_HUMAN	1	4	4	4	0.176
Ras-related C3 botulinum toxin substrate 1	RAC1_HUMAN	1	2	2	4	0.255
Dihydrolipoyl dehydrogenase, mitochondrial	DLDH_HUMAN	1	4	4	6	0.149
Fatty acid-binding protein, epidermal	FABP5_HUMAN	1	3	4	7	0.252
Transportin-1	TNPO1_HUMAN	1	2	2	2	0.0356
Transcription intermediary factor 1-beta	TIF1B_HUMAN	1	6	6	7	0.097
Glycine--tRNA ligase	SYG_HUMAN	1	5	5	6	0.124
Beta-hexosaminidase subunit beta	HEXB_HUMAN	1	3	3	4	0.0989
Eukaryotic translation initiation factor 2 subunit 1	IF2A_HUMAN	1	5	6	9	0.178
Protein-glutamine gamma-glutamyltransferase 2	TGM2_HUMAN	1	16	20	36	0.368
Thioredoxin reductase 1, cytoplasmic	TRXR1_HUMAN	1	2	2	2	0.0586
T-complex protein 1 subunit theta	TCPQ_HUMAN	1	14	14	24	0.325
Solute carrier family 2, facilitated glucose transporter member 3	GTR3_HUMAN	1	7	8	13	0.218
ATP synthase subunit delta, mitochondrial	ATPD_HUMAN	1	2	2	2	0.137
Ribosome biogenesis protein BOP1	BOP1_HUMAN	1	2	2	2	0.0764
Protein transport protein Sec31A	SC31A_HUMAN	1	2	2	2	0.0311
40S ribosomal protein S9	RS9_HUMAN	1	7	7	12	0.258
Importin subunit alpha-2	IMA2_HUMAN	1	6	7	9	0.217
NADH dehydrogenase [ubiquinone] iron-sulfur protein 3, mitochondrial	NDUS3_HUMAN	1	5	5	6	0.277
Enhancer of mRNA-decapping protein 4	EDC4_HUMAN	1	3	3	3	0.04
Nuclease-sensitive element-binding protein 1	YBOX1_HUMAN	1	3	5	15	0.244
Importin subunit alpha-1	IMA1_HUMAN	1	2	2	2	0.1
Programmed cell death 6-interacting protein	PDC6I_HUMAN	1	2	2	2	0.038
Heat shock protein HSP 90-beta	HS90B_HUMAN	1	14	19	137	0.481
Interleukin enhancer-binding factor 3	ILF3_HUMAN	1	6	7	7	0.0884
Peroxiredoxin-1	PRDX1_HUMAN	1	8	11	25	0.548
Inosine-5'-monophosphate dehydrogenase 2	IMDH2_HUMAN	1	8	9	10	0.224
Catenin alpha-1	CTNA1_HUMAN	1	3	4	11	0.0728
Heterogeneous nuclear ribonucleoprotein H	HNRH1_HUMAN	1	5	7	29	0.207
Caseinolytic peptidase B protein homolog	CLPB_HUMAN	1	2	2	2	0.0665
Hypoxia up-regulated protein 1	HYOU1_HUMAN	1	5	5	5	0.0911
Basic leucine zipper and W2 domain-containing protein 1	BZW1_HUMAN	1	2	2	2	0.126
Thioredoxin	THIO_HUMAN	1	6	8	13	0.571
Signal recognition particle receptor subunit alpha	SRPR_HUMAN	1	2	2	3	0.0627
26S proteasome non-ATPase regulatory subunit 1	PSMD1_HUMAN	1	9	9	10	0.134
Ornithine aminotransferase, mitochondrial	OAT_HUMAN	1	9	10	12	0.276
Splicing factor 3B subunit 3	SF3B3_HUMAN	1	7	7	7	0.0789
Aspartate--tRNA ligase, mitochondrial	SYDM_HUMAN	1	2	2	3	0.045
Treacle protein	TCOF_HUMAN	1	2	2	2	0.0222
40S ribosomal protein S19	RS19_HUMAN	1	6	7	15	0.359
40S ribosomal protein S18	RS18_HUMAN	1	5	5	8	0.303
60S ribosomal protein L27	RL27_HUMAN	1	5	5	10	0.426
Integrin beta-1	ITB1_HUMAN	1	2	2	2	0.0388
ATP-dependent RNA helicase DDX3X	DDX3X_HUMAN	1	9	10	15	0.198
Protein transport protein Sec61 subunit alpha isoform 1	S61A1_HUMAN	1	3	3	3	0.103
60S ribosomal protein L26	RL26_HUMAN	1	3	3	7	0.214
Lupus La protein	LA_HUMAN	1	12	14	22	0.316
ATP-citrate synthase	ACLY_HUMAN	1	7	7	9	0.0917
60S ribosomal protein L9	RL9_HUMAN	1	8	11	22	0.615
KH domain-containing, RNA-binding, signal transduction-associated protein 1	KHDR1_HUMAN	1	1	1	1	0.0655
Programmed cell death protein 6	PDCD6_HUMAN	1	2	2	2	0.126
Nuclear cap-binding protein subunit 1	NCBP1_HUMAN	1	2	2	2	0.0392
Proteasome subunit alpha type-6	PSA6_HUMAN	1	6	7	11	0.333
Protein FAM136A	F136A_HUMAN	1	2	2	3	0.203
Programmed cell death protein 5	PDCD5_HUMAN	1	3	4	4	0.28
Reticulocalbin-1	RCN1_HUMAN	1	5	5	8	0.251
Proteasome activator complex subunit 3	PSME3_HUMAN	1	4	6	8	0.346
NADH dehydrogenase [ubiquinone] iron-sulfur protein 8, mitochondrial	NDUS8_HUMAN	1	2	2	3	0.0952
Spliceosome RNA helicase DDX39B	DX39B_HUMAN	1	4	6	20	0.346
Protein NDRG1	NDRG1_HUMAN	1	4	5	6	0.165
Dehydrogenase/reductase SDR family member 2	DHRS2_HUMAN	1	2	2	3	0.128
Cellular nucleic acid-binding protein	CNBP_HUMAN	1	2	2	3	0.169
Annexin A2	ANXA2_HUMAN	1	9	15	208	0.684
Glutathione S-transferase omega-1	GSTO1_HUMAN	1	1	1	1	0.0581
Cat eye syndrome critical region protein 5	CECR5_HUMAN	1	3	4	5	0.135
Guanine nucleotide-binding protein G(s) subunit alpha isoforms XLas	GNAS1_HUMAN	1	3	4	6	0.0694
39S ribosomal protein L46, mitochondrial	RM46_HUMAN	1	2	2	2	0.176
Coatomer subunit delta	COPD_HUMAN	1	4	4	4	0.092
Cytosol aminopeptidase	AMPL_HUMAN	1	3	3	5	0.0829
Pentatricopeptide repeat domain-containing protein 3, mitochondrial	PTCD3_HUMAN	1	4	5	5	0.0885
26S proteasome non-ATPase regulatory subunit 14	PSDE_HUMAN	1	3	3	5	0.223
NADH-ubiquinone oxidoreductase 75 kDa subunit, mitochondrial	NDUS1_HUMAN	1	7	8	9	0.173
Plectin	PLEC_HUMAN	1	8	9	13	0.0374
Replication protein A 70 kDa DNA-binding subunit	RFA1_HUMAN	1	2	2	2	0.0519
ATP-dependent RNA helicase A	DHX9_HUMAN	1	12	14	27	0.139
Threonine--tRNA ligase, cytoplasmic	SYTC_HUMAN	1	4	4	4	0.0802
Sepiapterin reductase	SPRE_HUMAN	1	1	1	1	0.0728
Phosphate carrier protein, mitochondrial	MPCP_HUMAN	1	10	12	25	0.329
Pre-mRNA-processing factor 19	PRP19_HUMAN	1	2	2	3	0.0516
Transforming protein RhoA	RHOA_HUMAN	1	3	3	7	0.29
Thioredoxin-dependent peroxide reductase, mitochondrial	PRDX3_HUMAN	1	5	7	11	0.234
Heterogeneous nuclear ribonucleoprotein H3	HNRH3_HUMAN	1	4	5	6	0.153
Peroxiredoxin-2	PRDX2_HUMAN	1	2	2	4	0.146
Isocitrate dehydrogenase [NADP] cytoplasmic	IDHC_HUMAN	1	2	2	2	0.0725
Eukaryotic translation initiation factor 3 subunit A	EIF3A_HUMAN	1	10	11	17	0.0897
26S proteasome non-ATPase regulatory subunit 3	PSMD3_HUMAN	1	5	5	7	0.137
Lactoylglutathione lyase	LGUL_HUMAN	1	2	2	3	0.163
Ras-related protein Rab-11A	RB11A_HUMAN	1	3	3	5	0.157
Probable ATP-dependent RNA helicase DDX46	DDX46_HUMAN	1	2	2	2	0.0184
26S proteasome non-ATPase regulatory subunit 2	PSMD2_HUMAN	1	13	16	32	0.226
Elongation factor Tu, mitochondrial	EFTU_HUMAN	1	14	17	29	0.414
Heterogeneous nuclear ribonucleoprotein U	HNRPU_HUMAN	1	11	14	29	0.176
NADPH--cytochrome P450 reductase	NCPR_HUMAN	1	4	5	6	0.124
Enoyl-CoA hydratase, mitochondrial	ECHM_HUMAN	1	2	2	2	0.121
Fatty acid synthase	FAS_HUMAN	1	47	54	91	0.308
Nicotinamide phosphoribosyltransferase	NAMPT_HUMAN	1	6	7	7	0.23
Leucine-rich PPR motif-containing protein, mitochondrial	LPPRC_HUMAN	1	33	41	76	0.33
60S ribosomal protein L28	RL28_HUMAN	1	3	3	5	0.219
Probable ATP-dependent RNA helicase DDX5	DDX5_HUMAN	1	8	9	19	0.301
60S acidic ribosomal protein P0	RLA0_HUMAN	1	11	14	32	0.495
Hsp90 co-chaperone Cdc37	CDC37_HUMAN	1	3	3	3	0.143
RNA-binding protein 39	RBM39_HUMAN	1	3	3	3	0.0717
Caprin-1	CAPR1_HUMAN	1	7	7	11	0.116
Vigilin	VIGLN_HUMAN	1	2	2	2	0.0244
40S ribosomal protein S21	RS21_HUMAN	1	2	2	3	0.133
Proliferating cell nuclear antigen	PCNA_HUMAN	1	8	10	13	0.498
EH domain-containing protein 4	EHD4_HUMAN	1	3	4	4	0.0739
26S protease regulatory subunit 6A	PRS6A_HUMAN	1	4	5	8	0.15
Peptidyl-prolyl cis-trans isomerase FKBP3	FKBP3_HUMAN	1	3	3	3	0.152
CTP synthase 1	PYRG1_HUMAN	1	2	2	2	0.0474
Nucleoside diphosphate kinase B	NDKB_HUMAN	1	5	8	53	0.678
60S ribosomal protein L30	RL30_HUMAN	1	4	5	9	0.513
2-oxoglutarate dehydrogenase, mitochondrial	ODO1_HUMAN	1	3	3	6	0.0694
Annexin A3	ANXA3_HUMAN	1	7	8	13	0.272
Metaxin-2	MTX2_HUMAN	1	3	4	7	0.297
116 kDa U5 small nuclear ribonucleoprotein component	U5S1_HUMAN	1	4	6	7	0.0597
Tubulin beta-6 chain	TBB6_HUMAN	1	5	7	43	0.48
Splicing factor 3B subunit 2	SF3B2_HUMAN	1	6	6	8	0.086
ATP synthase subunit gamma, mitochondrial	ATPG_HUMAN	1	2	3	4	0.144
Replication protein A 14 kDa subunit	RFA3_HUMAN	1	3	3	3	0.488
Isoleucine--tRNA ligase, mitochondrial	SYIM_HUMAN	1	3	3	3	0.0474
Neuroblast differentiation-associated protein AHNAK	AHNK_HUMAN	1	87	90	120	0.202
Single-stranded DNA-binding protein, mitochondrial	SSBP_HUMAN	1	2	2	2	0.155
Coiled-coil-helix-coiled-coil-helix domain-containing protein 3, mitochondrial	CHCH3_HUMAN	1	2	2	2	0.115
F-actin-capping protein subunit beta	CAPZB_HUMAN	1	2	2	3	0.119
RNA-binding motif protein, X chromosome	RBMX_HUMAN	1	5	5	7	0.143
Mitochondrial import inner membrane translocase subunit TIM50	TIM50_HUMAN	1	7	8	10	0.266
Ribosome-binding protein 1	RRBP1_HUMAN	1	3	3	3	0.0255
MMS19 nucleotide excision repair protein homolog	MMS19_HUMAN	1	2	2	2	0.0408
Ras-related protein Rab-2A	RAB2A_HUMAN	1	2	2	2	0.127
Metallothionein-2	MT2_HUMAN	1	2	3	11	0.525
Protein TBRG4	TBRG4_HUMAN	1	3	3	3	0.113
Sorting nexin-1	SNX1_HUMAN	1	2	2	3	0.0402
Eukaryotic translation initiation factor 3 subunit C	EIF3C_HUMAN	1	4	4	5	0.0559
Sodium/potassium-transporting ATPase subunit beta-3	AT1B3_HUMAN	1	4	4	6	0.229
Eukaryotic translation initiation factor 3 subunit B	EIF3B_HUMAN	1	8	9	16	0.17
Valine--tRNA ligase	SYVC_HUMAN	1	2	3	5	0.0332
26S proteasome non-ATPase regulatory subunit 4	PSMD4_HUMAN	1	3	3	4	0.106
Isocitrate dehydrogenase [NAD] subunit beta, mitochondrial	IDH3B_HUMAN	1	2	2	3	0.0649
Platelet-activating factor acetylhydrolase IB subunit beta	PA1B2_HUMAN	1	3	4	5	0.336
Glycylpeptide N-tetradecanoyltransferase 1	NMT1_HUMAN	1	3	3	5	0.107
Fumarate hydratase, mitochondrial	FUMH_HUMAN	1	7	7	8	0.31
Cytochrome c oxidase subunit 6B1	CX6B1_HUMAN	1	4	4	5	0.581
Adenylyl cyclase-associated protein 1	CAP1_HUMAN	1	6	7	15	0.171
CUB domain-containing protein 1	CDCP1_HUMAN	1	4	4	5	0.0646
G-rich sequence factor 1	GRSF1_HUMAN	1	3	4	7	0.112
Serine/threonine-protein phosphatase PP1-alpha catalytic subunit	PP1A_HUMAN	1	3	3	17	0.403
Extended synaptotagmin-1	ESYT1_HUMAN	1	11	13	20	0.181
Protein dpy-30 homolog	DPY30_HUMAN	1	2	2	6	0.364
60S acidic ribosomal protein P2	RLA2_HUMAN	1	4	8	25	0.696
DnaJ homolog subfamily B member 1	DNJB1_HUMAN	1	2	2	2	0.0559
Eukaryotic translation initiation factor 4H	IF4H_HUMAN	1	3	5	8	0.282
T-complex protein 1 subunit alpha	TCPA_HUMAN	1	15	17	26	0.415
Probable ATP-dependent RNA helicase DDX6	DDX6_HUMAN	1	3	3	4	0.106
60S acidic ribosomal protein P1	RLA1_HUMAN	1	2	4	12	0.518
40S ribosomal protein S24	RS24_HUMAN	1	2	3	4	0.173
UPF0568 protein C14orf166	CN166_HUMAN	1	4	5	5	0.258
40S ribosomal protein S23	RS23_HUMAN	1	4	4	5	0.357
Transketolase	TKT_HUMAN	1	15	18	37	0.395
Carbonyl reductase [NADPH] 1	CBR1_HUMAN	1	3	3	4	0.13
SRA stem-loop-interacting RNA-binding protein, mitochondrial	SLIRP_HUMAN	1	3	5	7	0.367
Peptidyl-prolyl cis-trans isomerase FKBP4	FKBP4_HUMAN	1	6	6	7	0.155
26S protease regulatory subunit 10B	PRS10_HUMAN	1	4	4	6	0.141
60S ribosomal protein L31	RL31_HUMAN	1	3	4	5	0.248
Cytochrome c oxidase subunit 4 isoform 1, mitochondrial	COX41_HUMAN	1	2	2	2	0.13
Acyl carrier protein, mitochondrial	ACPM_HUMAN	1	2	2	3	0.154
Annexin A5	ANXA5_HUMAN	1	10	14	26	0.475
Elongation factor G, mitochondrial	EFGM_HUMAN	1	2	2	2	0.032
Eukaryotic translation initiation factor 3 subunit K	EIF3K_HUMAN	1	2	2	2	0.138
Dihydrolipoyllysine-residue succinyltransferase component of 2-oxoglutarate dehydrogenase complex, mitochondrial	ODO2_HUMAN	1	4	4	5	0.108
Annexin A4	ANXA4_HUMAN	1	2	2	2	0.1
Plasminogen activator inhibitor 1 RNA-binding protein	PAIRB_HUMAN	1	4	4	4	0.123
Heat shock protein beta-1	HSPB1_HUMAN	1	6	7	14	0.483
Translational activator GCN1	GCN1L_HUMAN	1	6	7	10	0.0397
Ubiquitin-40S ribosomal protein S27a	RS27A_HUMAN	1	5	5	5	0.449
ATP synthase subunit d, mitochondrial	ATP5H_HUMAN	1	2	2	2	0.236
Histidine triad nucleotide-binding protein 1	HINT1_HUMAN	1	1	2	6	0.159
Large neutral amino acids transporter small subunit 1	LAT1_HUMAN	1	3	3	3	0.12
10 kDa heat shock protein, mitochondrial	CH10_HUMAN	1	3	3	6	0.353
U2 small nuclear ribonucleoprotein B''	RU2B_HUMAN	1	2	2	3	0.12
V-type proton ATPase catalytic subunit A	VATA_HUMAN	1	4	4	4	0.147
NADH dehydrogenase [ubiquinone] 1 beta subcomplex subunit 10	NDUBA_HUMAN	1	2	2	3	0.14
14-3-3 protein sigma	1433S_HUMAN	1	2	3	9	0.169
U2 small nuclear ribonucleoprotein A'	RU2A_HUMAN	1	3	3	3	0.251
Rho GDP-dissociation inhibitor 1	GDIR1_HUMAN	1	2	2	3	0.275
Cytoplasmic dynein 1 heavy chain 1	DYHC1_HUMAN	1	4	4	4	0.0131
CAD protein	PYR1_HUMAN	1	12	12	12	0.0773
Mitotic checkpoint protein BUB3	BUB3_HUMAN	1	1	1	2	0.0396
Eukaryotic initiation factor 4A-I	IF4A1_HUMAN	1	10	15	78	0.616
Nucleolar and coiled-body phosphoprotein 1	NOLC1_HUMAN	1	3	4	16	0.0672
Heterogeneous nuclear ribonucleoproteins C1/C2	HNRPC_HUMAN	1	2	2	8	0.199
40S ribosomal protein S3a	RS3A_HUMAN	1	9	13	33	0.375
Cytochrome c	CYC_HUMAN	1	6	10	31	0.495
Catenin delta-1	CTND1_HUMAN	1	1	1	1	0.0145
Epidermal growth factor receptor	EGFR_HUMAN	1	2	2	3	0.0281
Peroxiredoxin-6	PRDX6_HUMAN	1	6	7	9	0.446
Peroxiredoxin-5, mitochondrial	PRDX5_HUMAN	1	4	4	5	0.234
Proliferation-associated protein 2G4	PA2G4_HUMAN	1	16	19	47	0.53
Septin-2	SEPT2_HUMAN	1	7	9	11	0.28
Alkyldihydroxyacetonephosphate synthase, peroxisomal	ADAS_HUMAN	1	4	4	5	0.0897
UV excision repair protein RAD23 homolog B	RD23B_HUMAN	1	3	3	3	0.0905
Microtubule-associated protein RP/EB family member 1	MARE1_HUMAN	1	2	2	2	0.0746
Inorganic pyrophosphatase	IPYR_HUMAN	1	6	8	21	0.298
Annexin A11	ANX11_HUMAN	1	2	2	2	0.0535
Zinc phosphodiesterase ELAC protein 2	RNZ2_HUMAN	1	2	2	2	0.0496
26S proteasome non-ATPase regulatory subunit 11	PSD11_HUMAN	1	3	3	4	0.0948
Prohibitin-2	PHB2_HUMAN	1	13	18	53	0.562
Transaldolase	TALDO_HUMAN	1	6	6	7	0.214
Nucleoprotein TPR	TPR_HUMAN	1	3	4	7	0.019
Annexin A6	ANXA6_HUMAN	1	21	28	52	0.452
Succinyl-CoA ligase [ADP/GDP-forming] subunit alpha, mitochondrial	SUCA_HUMAN	1	2	2	2	0.0896
78 kDa glucose-regulated protein	GRP78_HUMAN	1	13	13	26	0.286
Aminoacyl tRNA synthase complex-interacting multifunctional protein 1	AIMP1_HUMAN	1	2	2	2	0.0641
Serum albumin	ALBU_HUMAN	1	3	4	13	0.0591
Tyrosine-protein phosphatase non-receptor type 1	PTN1_HUMAN	1	5	5	7	0.159
Delta(24)-sterol reductase	DHC24_HUMAN	1	2	2	2	0.0795
Keratin, type I cytoskeletal 18	K1C18_HUMAN	1	12	16	51	0.379
Diablo homolog, mitochondrial	DBLOH_HUMAN	1	2	2	2	0.176
NADH dehydrogenase [ubiquinone] 1 alpha subcomplex subunit 5	NDUA5_HUMAN	1	2	2	2	0.31
Serine/arginine repetitive matrix protein 1	SRRM1_HUMAN	1	2	2	3	0.0509
Serine/threonine-protein phosphatase PP1-beta catalytic subunit	PP1B_HUMAN	1	1	1	15	0.336
Succinyl-CoA ligase [ADP-forming] subunit beta, mitochondrial	SUCB1_HUMAN	1	2	2	2	0.0475
Histidine--tRNA ligase, cytoplasmic	SYHC_HUMAN	1	5	5	7	0.183
Cytochrome c oxidase subunit 2	COX2_HUMAN	1	2	2	4	0.0881
60S ribosomal protein L27a	RL27A_HUMAN	1	5	5	9	0.23
Polyribonucleotide nucleotidyltransferase 1, mitochondrial	PNPT1_HUMAN	1	3	3	3	0.0524
T-complex protein 1 subunit beta	TCPB_HUMAN	1	22	25	45	0.624
40S ribosomal protein S25	RS25_HUMAN	1	4	4	10	0.24
tRNA (cytosine(34)-C(5))-methyltransferase	NSUN2_HUMAN	1	2	2	2	0.0274
Niban-like protein 1	NIBL1_HUMAN	1	3	4	4	0.067
Vinculin	VINC_HUMAN	1	3	3	7	0.0529
Nucleolar protein 56	NOP56_HUMAN	1	4	4	4	0.114
60S ribosomal protein L32	RL32_HUMAN	1	2	2	4	0.17
Plastin-1	PLSI_HUMAN	1	2	4	6	0.0556
Ras-related protein Rab-7a	RAB7A_HUMAN	1	8	10	17	0.473
Eukaryotic translation initiation factor 2 subunit 3	IF2G_HUMAN	1	4	5	6	0.14
Filamin-B	FLNB_HUMAN	1	54	63	109	0.323
ATP synthase subunit f, mitochondrial	ATPK_HUMAN	1	2	2	3	0.255
Purine nucleoside phosphorylase	PNPH_HUMAN	1	5	5	6	0.197
ADP-ribosylation factor-like protein 6-interacting protein 1	AR6P1_HUMAN	1	2	2	3	0.187
Proteasome subunit beta type-1	PSB1_HUMAN	1	4	5	8	0.257
Small nuclear ribonucleoprotein G-like protein	RUXGL_HUMAN	1	2	2	3	0.171
GTP-binding nuclear protein Ran	RAN_HUMAN	1	5	6	14	0.273
Vacuolar protein sorting-associated protein 35	VPS35_HUMAN	1	6	6	7	0.093
Electron transfer flavoprotein subunit beta	ETFB_HUMAN	1	6	6	7	0.255
Matrin-3	MATR3_HUMAN	1	6	7	11	0.122
14-3-3 protein theta	1433T_HUMAN	1	10	16	43	0.535
60S ribosomal protein L10	RL10_HUMAN	1	6	6	9	0.294
26S proteasome non-ATPase regulatory subunit 6	PSMD6_HUMAN	1	5	5	7	0.193
Eukaryotic initiation factor 4A-II	IF4A2_HUMAN	1	2	3	40	0.339
Polyadenylate-binding protein 1	PABP1_HUMAN	1	4	4	44	0.329
Sideroflexin-1	SFXN1_HUMAN	1	9	10	13	0.457
Elongation factor 1-beta	EF1B_HUMAN	1	5	7	12	0.387
Scavenger receptor class B member 1	SCRB1_HUMAN	1	1	1	1	0.0217
Puromycin-sensitive aminopeptidase	PSA_HUMAN	1	2	2	2	0.0413
Talin-1	TLN1_HUMAN	1	12	12	18	0.0984
ERO1-like protein alpha	ERO1A_HUMAN	1	2	2	2	0.0598
Heterogeneous nuclear ribonucleoprotein D0	HNRPD_HUMAN	1	5	5	14	0.169
Pre-mRNA-processing-splicing factor 8	PRP8_HUMAN	1	7	7	10	0.051
Prostaglandin E synthase 3	TEBP_HUMAN	1	2	2	3	0.188
Chloride intracellular channel protein 1	CLIC1_HUMAN	1	7	7	8	0.469
Heat shock cognate 71 kDa protein	HSP7C_HUMAN	1	21	34	157	0.559
tRNA-splicing ligase RtcB homolog	RTCB_HUMAN	1	3	3	3	0.113
Insulin-like growth factor 2 mRNA-binding protein 1	IF2B1_HUMAN	1	7	7	9	0.201
Palmitoyl-protein thioesterase 1	PPT1_HUMAN	1	3	3	3	0.212
Eukaryotic translation initiation factor 3 subunit F	EIF3F_HUMAN	1	5	5	5	0.182
Acetyl-CoA acetyltransferase, cytosolic	THIC_HUMAN	1	2	2	2	0.126
Pyruvate dehydrogenase E1 component subunit beta, mitochondrial	ODPB_HUMAN	1	4	5	5	0.142
Replication protein A 32 kDa subunit	RFA2_HUMAN	1	2	2	3	0.181
Eukaryotic translation initiation factor 3 subunit E	EIF3E_HUMAN	1	3	4	9	0.0899
Pyruvate dehydrogenase E1 component subunit alpha, somatic form, mitochondrial	ODPA_HUMAN	1	4	5	5	0.105
26S proteasome non-ATPase regulatory subunit 13	PSD13_HUMAN	1	9	9	10	0.375
Cystatin-F	CYTF_HUMAN	1	2	2	2	0.241
26S proteasome non-ATPase regulatory subunit 12	PSD12_HUMAN	1	3	4	4	0.0965
Malate dehydrogenase, cytoplasmic	MDHC_HUMAN	1	4	4	5	0.141
HIG1 domain family member 2A, mitochondrial	HIG2A_HUMAN	1	2	2	2	0.434
Ribonuclease inhibitor	RINI_HUMAN	1	6	6	6	0.273
Glycogen phosphorylase, brain form	PYGB_HUMAN	1	2	2	2	0.0415
Ubiquitin-like modifier-activating enzyme 1	UBA1_HUMAN	1	9	10	12	0.152
Ubiquitin carboxyl-terminal hydrolase 5	UBP5_HUMAN	1	2	2	3	0.0338
DNA replication licensing factor MCM3	MCM3_HUMAN	1	9	9	9	0.173
Far upstream element-binding protein 2	FUBP2_HUMAN	1	4	4	4	0.0788
Serine/arginine repetitive matrix protein 2	SRRM2_HUMAN	1	3	3	3	0.0145
Fructose-bisphosphate aldolase A	ALDOA_HUMAN	1	16	26	95	0.676
Succinyl-CoA ligase [GDP-forming] subunit beta, mitochondrial	SUCB2_HUMAN	1	2	2	2	0.0486
T-complex protein 1 subunit delta	TCPD_HUMAN	1	11	14	25	0.33
26S proteasome non-ATPase regulatory subunit 7	PSD7_HUMAN	1	5	8	13	0.201
Cell division control protein 42 homolog	CDC42_HUMAN	1	4	5	11	0.414
Myb-binding protein 1A	MBB1A_HUMAN	1	2	2	3	0.0279
Tubulin alpha-1C chain	TBA1C_HUMAN	1	5	7	94	0.646
40S ribosomal protein S26	RS26_HUMAN	1	3	5	6	0.339
Pre-rRNA-processing protein TSR1 homolog	TSR1_HUMAN	1	2	2	2	0.0473
Acyl-CoA dehydrogenase family member 9, mitochondrial	ACAD9_HUMAN	1	2	2	2	0.0564
Transgelin-2	TAGL2_HUMAN	1	9	13	31	0.588
Surfeit locus protein 4	SURF4_HUMAN	1	2	2	2	0.115
60S ribosomal protein L35	RL35_HUMAN	1	2	3	3	0.154
Nucleolar protein 58	NOP58_HUMAN	1	5	7	16	0.146
Spectrin beta chain, non-erythrocytic 1	SPTB2_HUMAN	1	14	15	15	0.0804
Non-POU domain-containing octamer-binding protein	NONO_HUMAN	1	3	3	6	0.108
Reticulon-4	RTN4_HUMAN	1	2	2	3	0.0394
T-complex protein 1 subunit zeta	TCPZ_HUMAN	1	16	20	53	0.433
Cytochrome c1, heme protein, mitochondrial	CY1_HUMAN	1	5	6	9	0.332
Ras-related protein Rab-21	RAB21_HUMAN	1	2	2	2	0.0533
Mitochondrial fission 1 protein	FIS1_HUMAN	1	4	4	6	0.243
Proteasome subunit beta type-4	PSB4_HUMAN	1	6	6	6	0.326
RuvB-like 1	RUVB1_HUMAN	1	4	5	6	0.154
Beta-catenin-like protein 1	CTBL1_HUMAN	1	2	2	2	0.0355
6-phosphogluconate dehydrogenase, decarboxylating	6PGD_HUMAN	1	6	7	11	0.199
Nucleoside diphosphate kinase A	NDKA_HUMAN	1	5	5	20	0.809
Thioredoxin domain-containing protein 17	TXD17_HUMAN	1	2	2	2	0.195
60S ribosomal protein L12	RL12_HUMAN	1	6	10	33	0.545
Dolichyl-diphosphooligosaccharide--protein glycosyltransferase 48 kDa subunit	OST48_HUMAN	1	1	1	1	0.0241
Prohibitin	PHB_HUMAN	1	15	21	69	0.79
60S ribosomal protein L11	RL11_HUMAN	1	2	3	12	0.129
Developmentally-regulated GTP-binding protein 1	DRG1_HUMAN	1	7	8	9	0.286
Heterogeneous nuclear ribonucleoprotein F	HNRPF_HUMAN	1	2	4	16	0.12
Eukaryotic initiation factor 4A-III	IF4A3_HUMAN	1	6	7	19	0.287
FACT complex subunit SSRP1	SSRP1_HUMAN	1	3	3	3	0.0522
U3 small nucleolar RNA-interacting protein 2	U3IP2_HUMAN	1	2	2	4	0.107
Copine-1	CPNE1_HUMAN	1	2	2	3	0.0559
Serine/arginine-rich splicing factor 6	SRSF6_HUMAN	1	2	2	2	0.0523
Secernin-1	SCRN1_HUMAN	1	2	2	2	0.07
Myosin light polypeptide 6	MYL6_HUMAN	1	3	4	15	0.417
DNA mismatch repair protein Msh2	MSH2_HUMAN	1	2	2	2	0.0332
Proteasome subunit alpha type-7	PSA7_HUMAN	1	6	6	10	0.411
Methionine--tRNA ligase, cytoplasmic	SYMC_HUMAN	1	3	3	4	0.0789
Eukaryotic translation initiation factor 3 subunit H	EIF3H_HUMAN	1	1	1	1	0.0341
Cytochrome c oxidase subunit 5B, mitochondrial	COX5B_HUMAN	1	5	5	6	0.411
Importin subunit beta-1	IMB1_HUMAN	1	11	13	27	0.226
Cytochrome c oxidase subunit 5A, mitochondrial	COX5A_HUMAN	1	4	5	9	0.413
Guanine nucleotide-binding protein subunit beta-2-like 1	GBLP_HUMAN	1	15	17	34	0.713
Dolichyl-diphosphooligosaccharide--protein glycosyltransferase subunit 1	RPN1_HUMAN	1	7	7	10	0.132
Proteasome subunit alpha type-4	PSA4_HUMAN	1	7	8	18	0.425
Myoferlin	MYOF_HUMAN	1	2	2	2	0.0116
Acyl-coenzyme A thioesterase 2, mitochondrial	ACOT2_HUMAN	1	2	2	2	0.118
Catenin beta-1	CTNB1_HUMAN	1	3	3	3	0.0653
40S ribosomal protein S20	RS20_HUMAN	1	3	5	7	0.227
NHP2-like protein 1	NH2L1_HUMAN	1	5	5	7	0.461
Nascent polypeptide-associated complex subunit alpha	NACA_HUMAN	1	5	8	12	0.326
NADH dehydrogenase [ubiquinone] 1 alpha subcomplex subunit 9, mitochondrial	NDUA9_HUMAN	1	2	3	5	0.0769
Profilin-1	PROF1_HUMAN	1	9	13	30	0.657
Proteasome activator complex subunit 1	PSME1_HUMAN	1	3	3	4	0.169
Stress-70 protein, mitochondrial	GRP75_HUMAN	1	15	20	61	0.336
Fructose-bisphosphate aldolase C	ALDOC_HUMAN	1	2	3	23	0.148
Acidic leucine-rich nuclear phosphoprotein 32 family member A	AN32A_HUMAN	1	4	5	10	0.361
Keratin, type II cytoskeletal 1	K2C1_HUMAN	1	1	1	2	0.0171
40S ribosomal protein S29	RS29_HUMAN	1	2	3	3	0.339
Macrophage migration inhibitory factor	MIF_HUMAN	1	2	2	5	0.557
Eukaryotic translation initiation factor 5A-1	IF5A1_HUMAN	1	9	13	24	0.617
60S ribosomal protein L13a	RL13A_HUMAN	1	5	5	9	0.251
T-complex protein 1 subunit epsilon	TCPE_HUMAN	1	13	15	32	0.381
Peptidyl-prolyl cis-trans isomerase B	PPIB_HUMAN	1	2	2	2	0.102
Glyceraldehyde-3-phosphate dehydrogenase	G3P_HUMAN	1	17	34	194	0.719
Peptidyl-prolyl cis-trans isomerase A	PPIA_HUMAN	1	10	17	81	0.667
Synaptic vesicle membrane protein VAT-1 homolog	VAT1_HUMAN	1	2	2	2	0.0636
Small nuclear ribonucleoprotein Sm D1	SMD1_HUMAN	1	2	3	14	0.277
FAS-associated factor 2	FAF2_HUMAN	1	3	4	5	0.126
RNA-binding protein EWS	EWS_HUMAN	1	2	2	2	0.0442
14-3-3 protein beta/alpha	1433B_HUMAN	1	7	9	36	0.537
60S ribosomal protein L36	RL36_HUMAN	1	3	3	7	0.286
Tumor protein D54	TPD54_HUMAN	1	4	5	6	0.262
L-lactate dehydrogenase A chain	LDHA_HUMAN	1	18	27	125	0.69
Poly(rC)-binding protein 1	PCBP1_HUMAN	1	7	10	33	0.478
Proteasome subunit beta type-3	PSB3_HUMAN	1	2	3	3	0.166
Galectin-1	LEG1_HUMAN	1	6	8	15	0.63
Glycerol-3-phosphate dehydrogenase, mitochondrial	GPDM_HUMAN	1	5	6	10	0.0894
Spectrin alpha chain, non-erythrocytic 1	SPTN1_HUMAN	1	17	18	27	0.114
ATP synthase subunit O, mitochondrial	ATPO_HUMAN	1	2	3	5	0.131
Proteasome subunit beta type-5	PSB5_HUMAN	1	3	3	3	0.186
Heat shock 70 kDa protein 1A/1B	HSP71_HUMAN	1	4	4	18	0.204
Protein SET	SET_HUMAN	1	4	7	19	0.238
RuvB-like 2	RUVB2_HUMAN	1	3	3	3	0.0842
V-type proton ATPase subunit B, brain isoform	VATB2_HUMAN	1	5	5	5	0.194
Glutathione S-transferase P	GSTP1_HUMAN	1	6	8	10	0.448
Ephrin type-A receptor 2	EPHA2_HUMAN	1	1	1	2	0.0318
60S ribosomal protein L14	RL14_HUMAN	1	4	6	14	0.209
Zyxin	ZYX_HUMAN	1	4	5	5	0.112
Tubulin beta-3 chain	TBB3_HUMAN	1	1	1	82	0.356
Stathmin	STMN1_HUMAN	1	2	2	2	0.148
60S ribosomal protein L13	RL13_HUMAN	1	5	5	9	0.242
DBIRD complex subunit KIAA1967	K1967_HUMAN	1	3	3	3	0.0477
RNA-binding protein 25	RBM25_HUMAN	1	4	4	7	0.0819
Protein S100-A10	S10AA_HUMAN	1	3	5	29	0.454
Copine-3	CPNE3_HUMAN	1	3	3	3	0.0912
60S ribosomal protein L37a	RL37A_HUMAN	1	2	3	3	0.326
26S protease regulatory subunit 4	PRS4_HUMAN	1	6	6	10	0.23
Granulins	GRN_HUMAN	1	2	2	2	0.0455
Elongation factor 1-delta	EF1D_HUMAN	1	7	7	9	0.399
Proteasome subunit alpha type-5	PSA5_HUMAN	1	3	4	9	0.145
Dynamin-like 120 kDa protein, mitochondrial	OPA1_HUMAN	1	6	6	8	0.106
Delta(3,5)-Delta(2,4)-dienoyl-CoA isomerase, mitochondrial	ECH1_HUMAN	1	4	6	15	0.253
Alpha-centractin	ACTZ_HUMAN	1	2	2	2	0.117
Histone H1.5	H15_HUMAN	1	2	2	2	0.102
Serine/arginine-rich splicing factor 1	SRSF1_HUMAN	1	2	2	2	0.141
Calnexin	CALX_HUMAN	1	7	8	15	0.179
Histone H1.2	H12_HUMAN	1	1	1	3	0.113
Protein DJ-1	PARK7_HUMAN	1	7	9	12	0.646
Eukaryotic translation initiation factor 3 subunit I	EIF3I_HUMAN	1	2	2	4	0.0708
DNA replication licensing factor MCM2	MCM2_HUMAN	1	11	11	13	0.156
Hexokinase-2	HXK2_HUMAN	1	2	2	3	0.0469
Putative ATP-dependent RNA helicase DHX30	DHX30_HUMAN	1	9	10	10	0.111
4F2 cell-surface antigen heavy chain	4F2_HUMAN	1	17	26	55	0.367
Glucose-6-phosphate isomerase	G6PI_HUMAN	1	10	13	34	0.303
Hexokinase-1	HXK1_HUMAN	1	5	6	8	0.0851
Peroxisomal multifunctional enzyme type 2	DHB4_HUMAN	1	2	2	2	0.0367
Eukaryotic peptide chain release factor GTP-binding subunit ERF3A	ERF3A_HUMAN	1	2	2	3	0.0661
Ezrin	EZRI_HUMAN	1	8	10	34	0.311
Deoxyuridine 5'-triphosphate nucleotidohydrolase, mitochondrial	DUT_HUMAN	1	3	4	5	0.151
Transitional endoplasmic reticulum ATPase	TERA_HUMAN	1	19	23	65	0.381
Heterogeneous nuclear ribonucleoprotein A/B	ROAA_HUMAN	1	3	4	11	0.151
Aldehyde dehydrogenase X, mitochondrial	AL1B1_HUMAN	1	3	3	4	0.0928
Vesicle-associated membrane protein-associated protein A	VAPA_HUMAN	1	4	5	10	0.237
Profilin-2	PROF2_HUMAN	1	2	2	2	0.279
Proteasome activator complex subunit 2	PSME2_HUMAN	1	3	4	9	0.213
Trifunctional purine biosynthetic protein adenosine-3	PUR2_HUMAN	1	9	9	14	0.145
Acidic leucine-rich nuclear phosphoprotein 32 family member B	AN32B_HUMAN	1	2	2	7	0.159
Endoplasmin	ENPL_HUMAN	1	15	16	29	0.27
Tubulin alpha-4A chain	TBA4A_HUMAN	1	5	7	84	0.542
39S ribosomal protein L10, mitochondrial	RM10_HUMAN	1	3	3	5	0.314
T-complex protein 1 subunit gamma	TCPG_HUMAN	1	15	17	27	0.428
60S ribosomal protein L10a	RL10A_HUMAN	1	9	12	24	0.401
Small nuclear ribonucleoprotein Sm D3	SMD3_HUMAN	1	2	2	3	0.151
Mesencephalic astrocyte-derived neurotrophic factor	MANF_HUMAN	1	3	3	3	0.225
Small nuclear ribonucleoprotein Sm D2	SMD2_HUMAN	1	2	2	2	0.153
60S ribosomal protein L38	RL38_HUMAN	1	3	5	14	0.5
Leucine-rich repeat-containing protein 59	LRC59_HUMAN	1	8	9	17	0.322
Flap endonuclease 1	FEN1_HUMAN	1	2	2	2	0.0974
Apoptosis inhibitor 5	API5_HUMAN	1	1	2	3	0.0344
L-lactate dehydrogenase B chain	LDHB_HUMAN	1	15	21	69	0.587
High mobility group protein B1	HMGB1_HUMAN	1	6	10	16	0.386
Ras-related protein Ral-A	RALA_HUMAN	1	1	1	2	0.0534
40S ribosomal protein S11	RS11_HUMAN	1	5	5	5	0.367
Aspartate aminotransferase, mitochondrial	AATM_HUMAN	1	5	6	15	0.188
60S ribosomal protein L36a	RL36A_HUMAN	1	1	1	2	0.0849
Proteasome subunit beta type-7	PSB7_HUMAN	1	3	3	3	0.177
Small nuclear ribonucleoprotein E	RUXE_HUMAN	1	2	3	6	0.391
CD81 antigen	CD81_HUMAN	1	2	3	4	0.165
ADP-ribosylation factor 1	ARF1_HUMAN	1	4	5	10	0.436
Proteasome subunit beta type-6	PSB6_HUMAN	1	3	3	5	0.251
Translin-associated protein X	TSNAX_HUMAN	1	2	2	2	0.134
14-3-3 protein zeta/delta	1433Z_HUMAN	1	9	13	38	0.608
THO complex subunit 4	THOC4_HUMAN	1	2	3	7	0.105
Condensin complex subunit 2	CND2_HUMAN	1	2	2	2	0.0567
Tubulin beta chain	TBB5_HUMAN	1	4	7	124	0.777
40S ribosomal protein S8	RS8_HUMAN	1	8	9	19	0.476
60S ribosomal protein L15	RL15_HUMAN	1	2	3	15	0.127
Condensin complex subunit 1	CND1_HUMAN	1	4	4	4	0.0385
Eukaryotic peptide chain release factor subunit 1	ERF1_HUMAN	1	3	3	3	0.114
Aspartate--tRNA ligase, cytoplasmic	SYDC_HUMAN	1	8	8	10	0.206
26S protease regulatory subunit 7	PRS7_HUMAN	1	11	12	22	0.293
Alpha-enolase	ENOA_HUMAN	1	22	36	143	0.666
Elongation factor 1-gamma	EF1G_HUMAN	1	11	14	26	0.43
Filamin-A	FLNA_HUMAN	1	41	42	62	0.267
Trifunctional enzyme subunit beta, mitochondrial	ECHB_HUMAN	1	8	8	9	0.257
Protein S100-A11	S10AB_HUMAN	1	6	10	33	0.829
Ras-related protein Rab-5C	RAB5C_HUMAN	1	2	3	13	0.181
40S ribosomal protein S5	RS5_HUMAN	1	5	7	25	0.328
Trifunctional enzyme subunit alpha, mitochondrial	ECHA_HUMAN	1	16	18	31	0.316
Triosephosphate isomerase	TPIS_HUMAN	1	10	10	12	0.556
Guanine nucleotide-binding protein G(k) subunit alpha	GNAI3_HUMAN	1	2	3	10	0.201
Creatine kinase S-type, mitochondrial	KCRS_HUMAN	1	2	2	3	0.112
X-ray repair cross-complementing protein 6	XRCC6_HUMAN	1	19	26	62	0.365
2',3'-cyclic-nucleotide 3'-phosphodiesterase	CN37_HUMAN	1	2	4	6	0.114
Epididymal secretory protein E1	NPC2_HUMAN	1	4	5	12	0.384
Hypoxanthine-guanine phosphoribosyltransferase	HPRT_HUMAN	1	2	2	2	0.11
3-hydroxyacyl-CoA dehydrogenase type-2	HCD2_HUMAN	1	6	9	26	0.437
Eukaryotic translation initiation factor 3 subunit J	EIF3J_HUMAN	1	2	2	2	0.0853
Stress-induced-phosphoprotein 1	STIP1_HUMAN	1	7	9	17	0.151
60S ribosomal protein L18a	RL18A_HUMAN	1	3	3	6	0.21
Cofilin-1	COF1_HUMAN	1	8	11	47	0.506
Lysosome-associated membrane glycoprotein 1	LAMP1_HUMAN	1	3	4	6	0.0719
Gamma-glutamyl hydrolase	GGH_HUMAN	1	4	5	8	0.208
Cyclin-dependent kinase 1	CDK1_HUMAN	1	1	2	4	0.0673
Sodium/myo-inositol cotransporter	SC5A3_HUMAN	1	6	7	17	0.114
Estradiol 17-beta-dehydrogenase 12	DHB12_HUMAN	1	4	4	6	0.215
Sialic acid synthase	SIAS_HUMAN	1	2	2	2	0.0641
Proactivator polypeptide	SAP_HUMAN	1	5	6	26	0.124
Tryptophan--tRNA ligase, cytoplasmic	SYWC_HUMAN	1	2	2	2	0.0828
Serine/threonine-protein phosphatase 2A 65 kDa regulatory subunit A alpha isoform	2AAA_HUMAN	1	6	8	12	0.173
Delta-1-pyrroline-5-carboxylate synthase	P5CS_HUMAN	1	5	5	7	0.0969
Phosphoribosylformylglycinamidine synthase	PUR4_HUMAN	1	2	2	2	0.0456
Arginase-2, mitochondrial	ARGI2_HUMAN	1	5	5	5	0.299
Guanine nucleotide-binding protein G(I)/G(S)/G(T) subunit beta-2	GBB2_HUMAN	1	6	6	20	0.426
Keratin, type II cytoskeletal 5	K2C5_HUMAN	1	10	10	27	0.283
Phosphatidylethanolamine-binding protein 1	PEBP1_HUMAN	1	2	2	2	0.118
Bifunctional glutamate/proline--tRNA ligase	SYEP_HUMAN	1	2	2	2	0.0192
39S ribosomal protein L12, mitochondrial	RM12_HUMAN	1	3	4	5	0.359
Asparagine synthetase [glutamine-hydrolyzing]	ASNS_HUMAN	1	3	3	5	0.0588
Protein transport protein Sec61 subunit beta	SC61B_HUMAN	1	2	2	3	0.271
T-complex protein 1 subunit eta	TCPH_HUMAN	1	16	21	37	0.425
Mitochondrial import inner membrane translocase subunit Tim13	TIM13_HUMAN	1	2	2	2	0.263
Destrin	DEST_HUMAN	1	2	2	4	0.17
Serine/arginine-rich splicing factor 3	SRSF3_HUMAN	1	4	4	8	0.329
GMP synthase [glutamine-hydrolyzing]	GUAA_HUMAN	1	10	12	13	0.277
Lysine--tRNA ligase	SYK_HUMAN	1	1	1	1	0.0151
Signal recognition particle 72 kDa protein	SRP72_HUMAN	1	2	2	2	0.0566
Leukotriene A-4 hydrolase	LKHA4_HUMAN	1	3	3	3	0.054
14-3-3 protein epsilon	1433E_HUMAN	1	12	17	35	0.49
X-ray repair cross-complementing protein 5	XRCC5_HUMAN	1	23	30	82	0.459
SUMO-activating enzyme subunit 1	SAE1_HUMAN	1	4	4	4	0.194
Splicing factor 3A subunit 3	SF3A3_HUMAN	1	4	4	4	0.15
E3 ubiquitin-protein ligase HUWE1	HUWE1_HUMAN	1	2	2	3	0.0126
Coatomer subunit beta	COPB_HUMAN	1	2	2	3	0.0336
Lysosomal protective protein	PPGB_HUMAN	1	2	2	2	0.05
Endoplasmic reticulum resident protein 29	ERP29_HUMAN	1	2	2	2	0.0843
Heat shock 70 kDa protein 4	HSP74_HUMAN	1	13	16	32	0.231
Actin, cytoplasmic 1	ACTB_HUMAN	1	9	16	257	0.733
ADP-ribosylation factor 4	ARF4_HUMAN	1	3	3	7	0.372
60 kDa heat shock protein, mitochondrial	CH60_HUMAN	1	37	57	273	0.754
Cullin-associated NEDD8-dissociated protein 1	CAND1_HUMAN	1	4	4	4	0.0585
Superoxide dismutase [Cu-Zn]	SODC_HUMAN	1	2	2	3	0.156
60S ribosomal protein L17	RL17_HUMAN	1	5	7	14	0.37
Apoptosis-inducing factor 1, mitochondrial	AIFM1_HUMAN	1	6	7	8	0.148
Translationally-controlled tumor protein	TCTP_HUMAN	1	3	4	6	0.227
Dihydrolipoyllysine-residue acetyltransferase component of pyruvate dehydrogenase complex, mitochondrial	ODP2_HUMAN	1	8	10	11	0.178
Heterogeneous nuclear ribonucleoprotein L	HNRPL_HUMAN	1	5	5	7	0.171
AP-2 complex subunit alpha-2	AP2A2_HUMAN	1	2	2	4	0.0618
Heterogeneous nuclear ribonucleoprotein K	HNRPK_HUMAN	1	18	26	48	0.518
26S protease regulatory subunit 8	PRS8_HUMAN	1	5	6	9	0.224
AP-2 complex subunit mu	AP2M1_HUMAN	1	2	2	2	0.0529
40S ribosomal protein S10	RS10_HUMAN	1	5	7	16	0.291
60S ribosomal protein L23a	RL23A_HUMAN	1	5	5	9	0.282
60S ribosomal protein L7a	RL7A_HUMAN	1	12	17	28	0.466
ATP-binding cassette sub-family D member 3	ABCD3_HUMAN	1	3	3	5	0.0819
Complement component 1 Q subcomponent-binding protein, mitochondrial	C1QBP_HUMAN	1	6	7	13	0.461
F-actin-capping protein subunit alpha-1	CAZA1_HUMAN	1	2	2	3	0.0874
Eukaryotic translation initiation factor 3 subunit M	EIF3M_HUMAN	1	3	3	5	0.115
Coronin-1C	COR1C_HUMAN	1	7	8	11	0.232
Staphylococcal nuclease domain-containing protein 1	SND1_HUMAN	1	10	10	12	0.159
Septin-9	SEPT9_HUMAN	1	7	7	9	0.15
Calpain-2 catalytic subunit	CAN2_HUMAN	1	3	3	3	0.0786
Pyruvate kinase isozymes M1/M2	KPYM_HUMAN	1	27	46	155	0.633
Eukaryotic translation initiation factor 3 subunit L	EIF3L_HUMAN	1	3	4	5	0.0851
Mitochondrial inner membrane protein	IMMT_HUMAN	1	8	10	14	0.146
DNA replication licensing factor MCM5	MCM5_HUMAN	1	8	8	9	0.176
Probable ATP-dependent RNA helicase DDX17	DDX17_HUMAN	1	3	3	11	0.144
Stomatin-like protein 2, mitochondrial	STML2_HUMAN	1	5	7	20	0.289
DNA replication licensing factor MCM4	MCM4_HUMAN	1	11	11	13	0.207
C-1-tetrahydrofolate synthase, cytoplasmic	C1TC_HUMAN	1	10	10	10	0.161
Activated RNA polymerase II transcriptional coactivator p15	TCP4_HUMAN	1	2	2	3	0.189
Guanine nucleotide-binding protein G(I)/G(S)/G(T) subunit beta-1	GBB1_HUMAN	1	1	1	13	0.215
Importin-5	IPO5_HUMAN	1	10	11	12	0.145
Coactosin-like protein	COTL1_HUMAN	1	5	6	12	0.507
Importin-4	IPO4_HUMAN	1	2	3	8	0.0241
Multifunctional protein ADE2	PUR6_HUMAN	1	12	15	29	0.459
Voltage-dependent anion-selective channel protein 1	VDAC1_HUMAN	1	8	8	13	0.332
Ran-specific GTPase-activating protein	RANG_HUMAN	1	4	4	4	0.318
Lon protease homolog, mitochondrial	LONM_HUMAN	1	7	7	8	0.12
LIM and SH3 domain protein 1	LASP1_HUMAN	1	4	4	7	0.207
Serine hydroxymethyltransferase, mitochondrial	GLYM_HUMAN	1	17	21	42	0.534
Obg-like ATPase 1	OLA1_HUMAN	1	4	5	13	0.136
DNA-dependent protein kinase catalytic subunit	PRKDC_HUMAN	1	7	8	13	0.0288
40S ribosomal protein S2	RS2_HUMAN	1	9	11	30	0.348
Nuclear migration protein nudC	NUDC_HUMAN	1	3	3	3	0.106
14-3-3 protein gamma	1433G_HUMAN	1	6	9	26	0.482
Eukaryotic translation initiation factor 2A	EIF2A_HUMAN	1	5	5	5	0.0991
Sodium/potassium-transporting ATPase subunit alpha-1	AT1A1_HUMAN	1	12	16	63	0.277
14-3-3 protein eta	1433F_HUMAN	1	5	6	11	0.358
Monocarboxylate transporter 1	MOT1_HUMAN	1	3	4	6	0.066
SUMO-activating enzyme subunit 2	SAE2_HUMAN	1	3	3	3	0.0641
Actin-related protein 2/3 complex subunit 2	ARPC2_HUMAN	1	2	2	3	0.13
Histone H4	H4_HUMAN	1	6	7	13	0.515
Membrane-associated progesterone receptor component 1	PGRC1_HUMAN	1	2	2	2	0.113
Eukaryotic translation initiation factor 5B	IF2P_HUMAN	1	2	2	2	0.0287
Adenylate kinase 2, mitochondrial	KAD2_HUMAN	1	11	13	25	0.607
Protein transport protein Sec23B	SC23B_HUMAN	1	1	1	2	0.0482
Splicing factor, proline- and glutamine-rich	SFPQ_HUMAN	1	4	4	7	0.1
Cathepsin B	CATB_HUMAN	1	5	7	16	0.189
Protein arginine N-methyltransferase 1	ANM1_HUMAN	1	8	10	13	0.266
Histone H2B type 1-C/E/F/G/I	H2B1C_HUMAN	1	2	2	21	0.357
V-type proton ATPase subunit E 1	VATE1_HUMAN	1	2	2	2	0.15
Very long-chain specific acyl-CoA dehydrogenase, mitochondrial	ACADV_HUMAN	1	10	10	10	0.244
Basigin	BASI_HUMAN	1	6	9	23	0.278
26S protease regulatory subunit 6B	PRS6B_HUMAN	1	3	4	4	0.134
Eukaryotic translation initiation factor 6	IF6_HUMAN	1	4	4	5	0.351
60S ribosomal protein L19	RL19_HUMAN	1	2	2	3	0.133
Protein disulfide-isomerase	PDIA1_HUMAN	1	12	12	16	0.323
Cell surface glycoprotein MUC18	MUC18_HUMAN	1	2	2	2	0.0573
60S ribosomal protein L18	RL18_HUMAN	1	4	5	18	0.25
Heterogeneous nuclear ribonucleoprotein M	HNRPM_HUMAN	1	8	8	9	0.168
Microtubule-associated protein 4	MAP4_HUMAN	1	5	6	7	0.072
40S ribosomal protein S12	RS12_HUMAN	1	7	9	22	0.538
NADH dehydrogenase [ubiquinone] iron-sulfur protein 2, mitochondrial	NDUS2_HUMAN	0.999	1	1	1	0.0497
Serine/threonine-protein phosphatase 2A 55 kDa regulatory subunit B beta isoform	2ABB_HUMAN	0.999	1	2	2	0.0316
ADP/ATP translocase 1	ADT1_HUMAN	0.999	1	1	10	0.349
Histone H2B type 1-B	H2B1B_HUMAN	0.999	1	1	19	0.349
CD44 antigen	CD44_HUMAN	0.999	1	1	2	0.0135
40S ribosomal protein S15a	RS15A_HUMAN	0.999	1	1	2	0.0615
Transmembrane protein 214	TM214_HUMAN	0.999	1	1	2	0.0305
Protein scribble homolog	SCRIB_HUMAN	0.999	1	1	1	0.011
Phosphoenolpyruvate carboxykinase [GTP], mitochondrial	PCKGM_HUMAN	0.999	1	1	2	0.0188
Cytochrome b-c1 complex subunit 6, mitochondrial	QCR6_HUMAN	0.999	1	1	1	0.198
Septin-11	SEP11_HUMAN	0.999	1	1	2	0.0793
40S ribosomal protein S27	RS27_HUMAN	0.999	1	2	5	0.286
Histone-binding protein RBBP7	RBBP7_HUMAN	0.999	1	1	3	0.122
Actin-related protein 2/3 complex subunit 1B	ARC1B_HUMAN	0.999	1	1	1	0.0618
H/ACA ribonucleoprotein complex subunit 1	GAR1_HUMAN	0.999	1	1	1	0.0415
Lamin-B1	LMNB1_HUMAN	0.999	1	2	3	0.041
B-cell receptor-associated protein 31	BAP31_HUMAN	0.999	1	1	1	0.0569
UMP-CMP kinase	KCY_HUMAN	0.999	1	1	1	0.0612
Actin, alpha cardiac muscle 1	ACTC_HUMAN	0.999	1	2	142	0.379
La-related protein 1	LARP1_HUMAN	0.999	1	1	6	0.0274
Inactive tyrosine-protein kinase 7	PTK7_HUMAN	0.999	1	1	1	0.00935
Heat shock 70 kDa protein 6	HSP76_HUMAN	0.999	1	1	16	0.117
Tubulin beta-8 chain	TBB8_HUMAN	0.999	1	2	50	0.207
Putative heat shock protein HSP 90-beta 2	H90B2_HUMAN	0.998	1	2	32	0.142
Histone H2A.x	H2AX_HUMAN	0.998	1	1	5	0.224
Heterogeneous nuclear ribonucleoprotein R	HNRPR_HUMAN	0.998	1	1	14	0.0821
Ras-related protein Rab-10	RAB10_HUMAN	0.998	1	1	8	0.165
Histone H2A.V	H2AV_HUMAN	0.998	1	1	4	0.297
Oligoribonuclease, mitochondrial	ORN_HUMAN	0.998	1	1	1	0.0759
Poly(rC)-binding protein 3	PCBP3_HUMAN	0.998	1	1	12	0.175
ATPase family AAA domain-containing protein 3B	ATD3B_HUMAN	0.998	1	1	2	0.0355
tRNA (adenine(58)-N(1))-methyltransferase catalytic subunit TRMT61A	TRM61_HUMAN	0.998	1	1	1	0.107
Exportin-7	XPO7_HUMAN	0.998	1	1	1	0.0147
Histone H3.2	H32_HUMAN	0.998	1	2	4	0.235
Histone-binding protein RBBP4	RBBP4_HUMAN	0.998	1	1	3	0.127
Histone H3.1	H31_HUMAN	0.998	1	2	4	0.235
Ribose-phosphate pyrophosphokinase 1	PRPS1_HUMAN	0.998	1	1	1	0.0472
Histone H3.3	H33_HUMAN	0.998	1	2	3	0.235
Histone H2A type 2-A	H2A2A_HUMAN	0.998	1	2	8	0.215
Phenylalanine--tRNA ligase alpha subunit	SYFA_HUMAN	0.998	1	2	2	0.0276
TATA-binding protein-associated factor 2N	RBP56_HUMAN	0.998	1	1	5	0.0524
Translocon-associated protein subunit delta	SSRD_HUMAN	0.998	1	1	1	0.0636
Syntaxin-binding protein 3	STXB3_HUMAN	0.998	1	1	2	0.0287
Pyrroline-5-carboxylate reductase 2	P5CR2_HUMAN	0.998	1	1	2	0.0719
DNA mismatch repair protein Msh6	MSH6_HUMAN	0.998	1	1	2	0.00882
Vesicle-associated membrane protein-associated protein B/C	VAPB_HUMAN	0.998	1	1	3	0.107
Mitochondrial intermediate peptidase	MIPEP_HUMAN	0.997	1	1	1	0.0295
Small nuclear ribonucleoprotein-associated proteins B and B'	RSMB_HUMAN	0.997	1	1	2	0.0333
Eukaryotic translation initiation factor 4 gamma 3	IF4G3_HUMAN	0.997	1	1	1	0.0151
Glycerol-3-phosphate dehydrogenase 1-like protein	GPD1L_HUMAN	0.997	1	1	1	0.0912
DNA-binding protein A	DBPA_HUMAN	0.996	1	1	3	0.0726
Isocitrate dehydrogenase [NAD] subunit alpha, mitochondrial	IDH3A_HUMAN	0.996	1	1	2	0.0464
Gelsolin	GELS_HUMAN	0.995	1	1	1	0.0115
Ras-related protein Rab-8A	RAB8A_HUMAN	0.995	1	1	6	0.174
Tight junction protein ZO-2	ZO2_HUMAN	0.994	1	1	1	0.0143
Hyaluronan synthase 1	HAS1_HUMAN	0.994	1	1	2	0.0138
60S ribosomal protein L21	RL21_HUMAN	0.993	1	2	4	0.0938
Serine/arginine-rich splicing factor 7	SRSF7_HUMAN	0.992	1	1	4	0.109
Ubiquitin-conjugating enzyme E2 variant 2	UB2V2_HUMAN	0.992	1	1	2	0.069
Tubulin-folding cofactor B	TBCB_HUMAN	0.99	1	1	1	0.0328
Alpha-aminoadipic semialdehyde dehydrogenase	AL7A1_HUMAN	0.989	0	0	0	0
Peptidyl-prolyl cis-trans isomerase F, mitochondrial	PPIF_HUMAN	0.988	1	1	1	0.0531
Copper transport protein ATOX1	ATOX1_HUMAN	0.987	1	1	1	0.132
Polyadenylate-binding protein 4	PABP4_HUMAN	0.987	0	0	26	0.144
LIM domain only protein 7	LMO7_HUMAN	0.976	1	1	1	0.00891
Monoacylglycerol lipase ABHD6	ABHD6_HUMAN	0.971	1	1	1	0.0445
Transmembrane and coiled-coil domain-containing protein 1	TMCO1_HUMAN	0.971	1	1	1	0.0798
Probable ATP-dependent RNA helicase DHX36	DHX36_HUMAN	0.971	1	1	1	0.0129
Acyl-coenzyme A thioesterase 9, mitochondrial	ACOT9_HUMAN	0.971	1	1	2	0.041
28S ribosomal protein S2, mitochondrial	RT02_HUMAN	0.971	1	1	1	0.0743
28S ribosomal protein S31, mitochondrial	RT31_HUMAN	0.971	1	1	2	0.0582
28S ribosomal protein S7, mitochondrial	RT07_HUMAN	0.971	1	1	1	0.0537
Mitochondrial ornithine transporter 1	ORNT1_HUMAN	0.971	1	1	1	0.093
Plakophilin-2	PKP2_HUMAN	0.971	1	1	1	0.0125
Phostensin	PPR18_HUMAN	0.971	1	1	1	0.0163
Carnitine O-palmitoyltransferase 1, liver isoform	CPT1A_HUMAN	0.971	1	1	2	0.022
Thioredoxin-related transmembrane protein 1	TMX1_HUMAN	0.971	1	1	1	0.0429
UBX domain-containing protein 4	UBXN4_HUMAN	0.971	1	1	1	0.0276
Heterogeneous nuclear ribonucleoprotein A3	ROA3_HUMAN	0.971	1	1	2	0.0265
Sarcolemmal membrane-associated protein	SLMAP_HUMAN	0.971	1	1	1	0.0314
DDRGK domain-containing protein 1	DDRGK_HUMAN	0.971	1	1	1	0.0541
Serine palmitoyltransferase 2	SPTC2_HUMAN	0.971	1	1	1	0.0356
Tumor necrosis factor receptor superfamily member 16	TNR16_HUMAN	0.971	1	1	2	0.0515
Ras-related protein Rab-14	RAB14_HUMAN	0.971	1	1	1	0.102
PRA1 family protein 3	PRAF3_HUMAN	0.971	1	1	1	0.101
DnaJ homolog subfamily A member 3, mitochondrial	DNJA3_HUMAN	0.971	1	1	2	0.0479
Protein S100-A13	S10AD_HUMAN	0.971	1	1	1	0.122
DNA-(apurinic or apyrimidinic site) lyase	APEX1_HUMAN	0.971	1	1	1	0.0566
Protein NipSnap homolog 2	NIPS2_HUMAN	0.971	1	1	1	0.0699
Integrin beta-5	ITB5_HUMAN	0.971	1	1	1	0.025
Mitochondrial 2-oxoglutarate/malate carrier protein	M2OM_HUMAN	0.971	1	1	1	0.0541
Microsomal glutathione S-transferase 3	MGST3_HUMAN	0.971	1	1	1	0.164
Mitochondrial import inner membrane translocase subunit TIM44	TIM44_HUMAN	0.971	1	1	1	0.0243
Guanine nucleotide-binding protein G(I)/G(S)/G(O) subunit gamma-12	GBG12_HUMAN	0.971	1	1	2	0.222
Dolichyl-diphosphooligosaccharide--protein glycosyltransferase subunit DAD1	DAD1_HUMAN	0.971	1	1	1	0.0885
28 kDa heat- and acid-stable phosphoprotein	HAP28_HUMAN	0.971	1	1	1	0.0884
Mitochondrial import receptor subunit TOM70	TOM70_HUMAN	0.971	1	2	4	0.0296
Large subunit GTPase 1 homolog	LSG1_HUMAN	0.971	1	1	1	0.0456
Integrin alpha-V	ITAV_HUMAN	0.971	1	1	1	0.0105
Sorbitol dehydrogenase	DHSO_HUMAN	0.971	1	1	1	0.0252
NADH dehydrogenase [ubiquinone] iron-sulfur protein 7, mitochondrial	NDUS7_HUMAN	0.971	1	2	2	0.127
HIG1 domain family member 1A, mitochondrial	HIG1A_HUMAN	0.971	1	1	1	0.237
39S ribosomal protein L44, mitochondrial	RM44_HUMAN	0.971	1	1	1	0.0392
39S ribosomal protein L21, mitochondrial	RM21_HUMAN	0.971	1	1	1	0.0927
Methylcrotonoyl-CoA carboxylase beta chain, mitochondrial	MCCB_HUMAN	0.971	1	1	1	0.0231
Coiled-coil domain-containing protein 51	CCD51_HUMAN	0.971	1	1	1	0.0852
Serine protease HTRA2, mitochondrial	HTRA2_HUMAN	0.971	1	1	1	0.0524
ELAV-like protein 1	ELAV1_HUMAN	0.971	1	1	1	0.0399
7-dehydrocholesterol reductase	DHCR7_HUMAN	0.971	1	1	1	0.0274
Peptidyl-tRNA hydrolase 2, mitochondrial	PTH2_HUMAN	0.971	1	1	3	0.0838
Mitochondrial import inner membrane translocase subunit Tim9	TIM9_HUMAN	0.971	1	1	1	0.169
Cytochrome c-type heme lyase	CCHL_HUMAN	0.971	1	1	1	0.056
Transmembrane protein 109	TM109_HUMAN	0.971	1	1	1	0.0494
Double-stranded RNA-binding protein Staufen homolog 1	STAU1_HUMAN	0.971	1	2	2	0.0225
Ubiquitin-associated protein 2-like	UBP2L_HUMAN	0.971	1	1	1	0.00828
Zinc finger CCCH domain-containing protein 15	ZC3HF_HUMAN	0.971	1	1	1	0.0235
Signal recognition particle 14 kDa protein	SRP14_HUMAN	0.971	1	2	2	0.103
Microtubule-associated proteins 1A/1B light chain 3B	MLP3B_HUMAN	0.971	1	1	1	0.112
Mitochondrial import inner membrane translocase subunit Tim23	TIM23_HUMAN	0.971	1	1	1	0.105
Pituitary tumor-transforming gene 1 protein-interacting protein	PTTG_HUMAN	0.971	1	1	2	0.1
Thioredoxin domain-containing protein 12	TXD12_HUMAN	0.971	1	1	1	0.0872
Golgi SNAP receptor complex member 1	GOSR1_HUMAN	0.971	1	1	1	0.06
E3 UFM1-protein ligase 1	UFL1_HUMAN	0.971	1	1	1	0.029
Structural maintenance of chromosomes protein 4	SMC4_HUMAN	0.971	1	2	3	0.0116
Monofunctional C1-tetrahydrofolate synthase, mitochondrial	C1TM_HUMAN	0.971	1	1	1	0.0204
Ras-related protein Rab-35	RAB35_HUMAN	0.971	1	1	2	0.199
NADH dehydrogenase [ubiquinone] flavoprotein 2, mitochondrial	NDUV2_HUMAN	0.971	1	1	1	0.0522
Protein transport protein Sec24C	SC24C_HUMAN	0.971	1	1	1	0.0165
ES1 protein homolog, mitochondrial	ES1_HUMAN	0.971	1	1	1	0.0933
Sorting nexin-3	SNX3_HUMAN	0.971	1	1	2	0.0556
Mitochondrial import inner membrane translocase subunit Tim8 A	TIM8A_HUMAN	0.971	1	1	1	0.113
Dolichyl-diphosphooligosaccharide--protein glycosyltransferase subunit 2	RPN2_HUMAN	0.971	1	1	1	0.0507
39S ribosomal protein L4, mitochondrial	RM04_HUMAN	0.971	1	1	1	0.0386
CD97 antigen	CD97_HUMAN	0.971	1	1	1	0.0192
Far upstream element-binding protein 1	FUBP1_HUMAN	0.971	1	1	1	0.0155
Ras-related protein R-Ras2	RRAS2_HUMAN	0.971	1	1	1	0.0588
Mitochondrial-processing peptidase subunit beta	MPPB_HUMAN	0.971	1	1	1	0.0184
Inorganic pyrophosphatase 2, mitochondrial	IPYR2_HUMAN	0.971	1	1	1	0.0479
Histidine triad nucleotide-binding protein 2, mitochondrial	HINT2_HUMAN	0.971	1	1	1	0.0982
Cytochrome c oxidase protein 20 homolog	COX20_HUMAN	0.971	1	1	1	0.119
Cysteine and glycine-rich protein 1	CSRP1_HUMAN	0.971	1	1	1	0.0777
Guanine nucleotide-binding protein-like 3	GNL3_HUMAN	0.971	1	1	1	0.0437
28S ribosomal protein S22, mitochondrial	RT22_HUMAN	0.971	1	1	1	0.0361
Metaxin-1	MTX1_HUMAN	0.971	1	1	1	0.0322
NADH dehydrogenase [ubiquinone] 1 alpha subcomplex subunit 8	NDUA8_HUMAN	0.971	1	1	1	0.105
H/ACA ribonucleoprotein complex subunit 4	DKC1_HUMAN	0.971	1	1	2	0.0389
Sterol-4-alpha-carboxylate 3-dehydrogenase, decarboxylating	NSDHL_HUMAN	0.971	1	1	1	0.0643
Vesicle-associated membrane protein 8	VAMP8_HUMAN	0.971	1	1	1	0.1
Phenylalanine--tRNA ligase beta subunit	SYFB_HUMAN	0.971	1	1	1	0.0221
Sortilin	SORT_HUMAN	0.971	1	1	1	0.012
Succinate dehydrogenase [ubiquinone] iron-sulfur subunit, mitochondrial	DHSB_HUMAN	0.971	1	1	1	0.0357
Lysosome membrane protein 2	SCRB2_HUMAN	0.971	1	1	1	0.0397
28S ribosomal protein S17, mitochondrial	RT17_HUMAN	0.971	1	1	1	0.0692
40S ribosomal protein S28	RS28_HUMAN	0.971	1	1	1	0.174
Putative cytochrome b-c1 complex subunit Rieske-like protein 1	UCRIL_HUMAN	0.971	1	1	2	0.0742
Neuropathy target esterase	PLPL6_HUMAN	0.971	1	1	1	0.019
Arginine--tRNA ligase, cytoplasmic	SYRC_HUMAN	0.971	1	1	1	0.0152
40S ribosomal protein S30	RS30_HUMAN	0.971	1	1	2	0.169
Protein QIL1	QIL1_HUMAN	0.971	1	1	1	0.271
Minor histocompatibility antigen H13	HM13_HUMAN	0.971	1	1	1	0.0318
ATP-binding cassette sub-family F member 2	ABCF2_HUMAN	0.971	1	1	1	0.0225
Drebrin	DREB_HUMAN	0.971	1	1	1	0.0139
NFU1 iron-sulfur cluster scaffold homolog, mitochondrial	NFU1_HUMAN	0.971	1	1	1	0.0512
Glutaredoxin-related protein 5, mitochondrial	GLRX5_HUMAN	0.971	1	1	1	0.0892
Sphingosine-1-phosphate lyase 1	SGPL1_HUMAN	0.971	1	1	1	0.0352
N-acetyltransferase 10	NAT10_HUMAN	0.971	1	2	2	0.0254
Epoxide hydrolase 1	HYEP_HUMAN	0.971	1	1	1	0.044
Syntaxin-7	STX7_HUMAN	0.971	1	1	1	0.0383
Protein BUD31 homolog	BUD31_HUMAN	0.971	1	1	2	0.139
28S ribosomal protein S27, mitochondrial	RT27_HUMAN	0.971	1	1	1	0.058
28S ribosomal protein S26, mitochondrial	RT26_HUMAN	0.971	1	1	1	0.0878
Malonyl-CoA-acyl carrier protein transacylase, mitochondrial	FABD_HUMAN	0.971	1	1	1	0.059
Neuroblastoma-amplified sequence	NBAS_HUMAN	0.971	1	1	1	0.00844
Tyrosine-protein kinase Yes	YES_HUMAN	0.971	1	1	1	0.0405
ADP-ribosylation factor-like protein 8B	ARL8B_HUMAN	0.971	1	1	2	0.086
Retinol dehydrogenase 11	RDH11_HUMAN	0.971	1	1	1	0.0409
Galectin-3	LEG3_HUMAN	0.971	1	1	1	0.044
Protein lin-7 homolog C	LIN7C_HUMAN	0.971	1	1	1	0.0558
CD59 glycoprotein	CD59_HUMAN	0.971	1	1	1	0.0938
Cytoskeleton-associated protein 4	CKAP4_HUMAN	0.971	1	1	1	0.0266
Mitochondrial dicarboxylate carrier	DIC_HUMAN	0.971	1	1	1	0.0836
3-ketoacyl-CoA thiolase, peroxisomal	THIK_HUMAN	0.971	1	1	1	0.0495
28S ribosomal protein S28, mitochondrial	RT28_HUMAN	0.971	1	1	1	0.0481
ATP-dependent RNA helicase DDX18	DDX18_HUMAN	0.971	1	1	2	0.0209
Nuclear fragile X mental retardation-interacting protein 2	NUFP2_HUMAN	0.971	1	1	1	0.0173
Protein S100-A16	S10AG_HUMAN	0.971	1	1	1	0.184
60S ribosomal protein L35a	RL35A_HUMAN	0.971	1	1	2	0.0818
28S ribosomal protein S6, mitochondrial	RT06_HUMAN	0.971	1	1	1	0.192
E3 ubiquitin/ISG15 ligase TRIM25	TRI25_HUMAN	0.971	1	2	3	0.0286
Bifunctional methylenetetrahydrofolate dehydrogenase/cyclohydrolase, mitochondrial	MTDC_HUMAN	0.971	1	2	3	0.0686
Unconventional myosin-Ib	MYO1B_HUMAN	0.971	1	1	1	0.0185
Splicing factor 1	SF01_HUMAN	0.971	1	1	1	0.025
Heterogeneous nuclear ribonucleoprotein U-like protein 2	HNRL2_HUMAN	0.971	1	1	1	0.0187
Mitochondrial import receptor subunit TOM34	TOM34_HUMAN	0.971	1	1	1	0.0356
NADH-cytochrome b5 reductase 3	NB5R3_HUMAN	0.971	1	1	1	0.0399
Dipeptidyl peptidase 1	CATC_HUMAN	0.971	1	1	1	0.0497
NADH dehydrogenase [ubiquinone] 1 alpha subcomplex subunit 4	NDUA4_HUMAN	0.971	1	1	2	0.148
Regulator of microtubule dynamics protein 3	RMD3_HUMAN	0.971	1	1	2	0.0489
Protein tweety homolog 3	TTYH3_HUMAN	0.971	1	1	1	0.0268
39S ribosomal protein L53, mitochondrial	RM53_HUMAN	0.971	1	1	1	0.161
Serine--tRNA ligase, mitochondrial	SYSM_HUMAN	0.97	1	1	1	0.0212
DAZ-associated protein 1	DAZP1_HUMAN	0.968	1	1	1	0.0246
Transmembrane emp24 domain-containing protein 10	TMEDA_HUMAN	0.964	1	1	1	0.0776
28S ribosomal protein S23, mitochondrial	RT23_HUMAN	0.964	1	1	1	0.0526
Isovaleryl-CoA dehydrogenase, mitochondrial	IVD_HUMAN	0.962	1	1	1	0.0827
Mitochondrial ribonuclease P protein 1	MRRP1_HUMAN	0.957	1	1	1	0.0273
Integrin beta-4	ITB4_HUMAN	0.954	1	1	1	0.0137
ER membrane protein complex subunit 1	EMC1_HUMAN	0.953	1	1	1	0.0201

## Sheet: Microsome
Protein name	Protein accession numbers	Protein identification probability	Exclusive unique peptide count	Exclusive unique spectrum count	Total spectrum count	Percentage sequence coverage
3-ketoacyl-CoA thiolase, mitochondrial	THIM_HUMAN	1	2	2	3	0.0982
Monoacylglycerol lipase ABHD6	ABHD6_HUMAN	1	2	2	3	0.0831
Heterogeneous nuclear ribonucleoprotein A1	ROA1_HUMAN	1	11	17	39	0.395
Acetyl-CoA acetyltransferase, mitochondrial	THIL_HUMAN	1	8	10	40	0.29
Procollagen-lysine,2-oxoglutarate 5-dioxygenase 3	PLOD3_HUMAN	1	7	7	7	0.134
60S ribosomal protein L3	RL3_HUMAN	1	7	9	16	0.28
Prelamin-A/C	LMNA_HUMAN	1	4	4	4	0.0768
Multidrug resistance-associated protein 4	MRP4_HUMAN	1	1	1	1	0.0174
39S ribosomal protein L38, mitochondrial	RM38_HUMAN	1	3	3	3	0.0789
Glutamate dehydrogenase 1, mitochondrial	DHE3_HUMAN	1	20	22	32	0.532
NAD-dependent malic enzyme, mitochondrial	MAOM_HUMAN	1	2	2	2	0.0993
Neutral amino acid transporter B(0)	AAAT_HUMAN	1	6	9	42	0.172
NFU1 iron-sulfur cluster scaffold homolog, mitochondrial	NFU1_HUMAN	1	2	2	4	0.0906
Integrin beta-1	ITB1_HUMAN	1	7	7	10	0.149
Acyl-coenzyme A thioesterase 9, mitochondrial	ACOT9_HUMAN	1	6	7	7	0.125
Guanine nucleotide-binding protein G(I)/G(S)/G(T) subunit beta-2	GBB2_HUMAN	1	6	8	45	0.476
28S ribosomal protein S31, mitochondrial	RT31_HUMAN	1	3	4	11	0.114
28S ribosomal protein S7, mitochondrial	RT07_HUMAN	1	3	3	4	0.153
Elongation factor 2	EF2_HUMAN	1	24	32	85	0.414
Serine/threonine-protein kinase 11-interacting protein	S11IP_HUMAN	1	2	3	3	0.0355
Mitochondrial import receptor subunit TOM7 homolog	TOM7_HUMAN	1	2	2	4	0.564
Voltage-dependent anion-selective channel protein 2	VDAC2_HUMAN	1	11	13	26	0.493
Keratin, type II cytoskeletal 8	K2C8_HUMAN	1	14	17	31	0.385
Keratin, type I cytoskeletal 19	K1C19_HUMAN	1	3	4	13	0.102
39S ribosomal protein L15, mitochondrial	RM15_HUMAN	1	6	6	6	0.27
Unconventional myosin-Id	MYO1D_HUMAN	1	13	15	21	0.169
Transmembrane protein 33	TMM33_HUMAN	1	5	5	8	0.235
Isocitrate dehydrogenase [NAD] subunit beta, mitochondrial	IDH3B_HUMAN	1	4	5	6	0.197
Ras-related protein Rab-1B	RAB1B_HUMAN	1	2	2	9	0.443
Unconventional myosin-Ic	MYO1C_HUMAN	1	21	23	46	0.264
40S ribosomal protein S3	RS3_HUMAN	1	14	15	28	0.63
Mannosyl-oligosaccharide glucosidase	MOGS_HUMAN	1	13	15	22	0.309
Plakophilin-2	PKP2_HUMAN	1	5	5	6	0.0897
E3 ubiquitin/ISG15 ligase TRIM25	TRI25_HUMAN	1	3	3	4	0.0667
Adenylate kinase isoenzyme 4, mitochondrial	KAD4_HUMAN	1	6	7	10	0.327
Wolframin	WFS1_HUMAN	1	4	4	4	0.0663
GTP:AMP phosphotransferase, mitochondrial	KAD3_HUMAN	1	5	6	12	0.273
Cathepsin D	CATD_HUMAN	1	9	12	32	0.272
Delta(3,5)-Delta(2,4)-dienoyl-CoA isomerase, mitochondrial	ECH1_HUMAN	1	8	12	38	0.405
39S ribosomal protein L10, mitochondrial	RM10_HUMAN	1	3	4	20	0.314
Atlastin-3	ATLA3_HUMAN	1	4	4	5	0.152
Atlastin-2	ATLA2_HUMAN	1	4	4	6	0.0961
Carnitine O-palmitoyltransferase 1, liver isoform	CPT1A_HUMAN	1	6	6	7	0.138
Protein disulfide-isomerase A3	PDIA3_HUMAN	1	23	29	59	0.519
Serine palmitoyltransferase 1	SPTC1_HUMAN	1	4	5	5	0.161
Heterogeneous nuclear ribonucleoprotein L	HNRPL_HUMAN	1	4	4	7	0.126
Ephrin-B1	EFNB1_HUMAN	1	2	2	3	0.0896
Ubiquitin-associated protein 2-like	UBP2L_HUMAN	1	2	3	4	0.0202
Cathepsin Z	CATZ_HUMAN	1	4	5	11	0.158
Methyltransferase-like protein 7B	MET7B_HUMAN	1	1	1	1	0.041
Acyl-protein thioesterase 1	LYPA1_HUMAN	1	2	2	2	0.174
40S ribosomal protein S14	RS14_HUMAN	1	6	7	17	0.265
Peptide deformylase, mitochondrial	DEFM_HUMAN	1	1	1	1	0.0823
Translational activator of cytochrome c oxidase 1	TACO1_HUMAN	1	2	2	2	0.101
40S ribosomal protein S13	RS13_HUMAN	1	4	6	23	0.331
Heterogeneous nuclear ribonucleoprotein A3	ROA3_HUMAN	1	3	3	3	0.13
Splicing factor U2AF 65 kDa subunit	U2AF2_HUMAN	1	2	2	2	0.0926
Sarcolemmal membrane-associated protein	SLMAP_HUMAN	1	2	2	2	0.0435
Heterogeneous nuclear ribonucleoproteins A2/B1	ROA2_HUMAN	1	12	14	31	0.385
Calmodulin	CALM_HUMAN	1	4	5	19	0.617
60S ribosomal protein L22	RL22_HUMAN	1	3	4	10	0.391
Aconitate hydratase, mitochondrial	ACON_HUMAN	1	11	14	25	0.235
ADP/ATP translocase 1	ADT1_HUMAN	1	3	3	29	0.466
60S ribosomal protein L21	RL21_HUMAN	1	2	4	8	0.162
Actin-related protein 3	ARP3_HUMAN	1	4	5	10	0.167
60S ribosomal protein L4	RL4_HUMAN	1	12	15	45	0.347
60S ribosomal protein L5	RL5_HUMAN	1	8	11	32	0.357
39S ribosomal protein L39, mitochondrial	RM39_HUMAN	1	2	2	2	0.0769
Calponin-2	CNN2_HUMAN	1	6	6	7	0.35
Malate dehydrogenase, mitochondrial	MDHM_HUMAN	1	16	28	112	0.731
NADH dehydrogenase [ubiquinone] iron-sulfur protein 4, mitochondrial	NDUS4_HUMAN	1	2	2	2	0.154
Myosin regulatory light chain 12A	ML12A_HUMAN	1	5	7	10	0.386
Fragile X mental retardation syndrome-related protein 1	FXR1_HUMAN	1	9	9	13	0.188
28S ribosomal protein S9, mitochondrial	RT09_HUMAN	1	5	5	6	0.179
NADH dehydrogenase [ubiquinone] 1 alpha subcomplex subunit 10, mitochondrial	NDUAA_HUMAN	1	6	7	9	0.276
Deoxyribonuclease-2-alpha	DNS2A_HUMAN	1	2	2	2	0.0722
Serine palmitoyltransferase 2	SPTC2_HUMAN	1	2	2	2	0.0498
39S ribosomal protein L41, mitochondrial	RM41_HUMAN	1	3	3	4	0.423
Nucleolar RNA helicase 2	DDX21_HUMAN	1	5	5	5	0.0932
RNA-binding protein FUS	FUS_HUMAN	1	5	6	13	0.131
Ras GTPase-activating protein-binding protein 2	G3BP2_HUMAN	1	2	2	3	0.0622
Voltage-dependent anion-selective channel protein 3	VDAC3_HUMAN	1	6	6	8	0.272
39S ribosomal protein L17, mitochondrial	RM17_HUMAN	1	1	1	3	0.0857
Ras GTPase-activating protein-binding protein 1	G3BP1_HUMAN	1	9	12	27	0.315
ATP synthase subunit alpha, mitochondrial	ATPA_HUMAN	1	23	31	90	0.573
Ras GTPase-activating-like protein IQGAP1	IQGA1_HUMAN	1	3	3	3	0.0404
CD9 antigen	CD9_HUMAN	1	2	4	19	0.154
Ras-related C3 botulinum toxin substrate 1	RAC1_HUMAN	1	5	5	8	0.417
Quinone oxidoreductase	QOR_HUMAN	1	2	2	2	0.0881
Succinyl-CoA ligase [ADP-forming] subunit beta, mitochondrial	SUCB1_HUMAN	1	4	5	5	0.106
28S ribosomal protein S10, mitochondrial	RT10_HUMAN	1	2	2	2	0.129
40S ribosomal protein S5	RS5_HUMAN	1	7	10	26	0.471
Myosin-9	MYH9_HUMAN	1	19	21	44	0.198
Adrenodoxin, mitochondrial	ADX_HUMAN	1	2	2	2	0.163
Enoyl-CoA delta isomerase 1, mitochondrial	ECI1_HUMAN	1	4	5	15	0.232
Monocarboxylate transporter 4	MOT4_HUMAN	1	4	4	6	0.138
Protein S100-A4	S10A4_HUMAN	1	2	2	3	0.188
Actin-related protein 2/3 complex subunit 4	ARPC4_HUMAN	1	2	2	2	0.0952
40S ribosomal protein SA	RSSA_HUMAN	1	12	14	36	0.58
Peptidyl-prolyl cis-trans isomerase FKBP11	FKB11_HUMAN	1	3	4	8	0.234
HLA class I histocompatibility antigen, A-2 alpha chain	1A02_HUMAN	1	2	2	11	0.238
Regulator of microtubule dynamics protein 1	RMD1_HUMAN	1	2	2	2	0.0701
Isoleucine--tRNA ligase, mitochondrial	SYIM_HUMAN	1	13	15	21	0.202
Peptidyl-prolyl cis-trans isomerase FKBP10	FKB10_HUMAN	1	1	1	1	0.0206
Eukaryotic translation initiation factor 4 gamma 2	IF4G2_HUMAN	1	2	2	4	0.0364
Long-chain-fatty-acid--CoA ligase 4	ACSL4_HUMAN	1	6	8	15	0.201
Moesin	MOES_HUMAN	1	6	6	21	0.248
Eukaryotic translation initiation factor 4 gamma 1	IF4G1_HUMAN	1	7	7	10	0.0719
Protein disulfide-isomerase A4	PDIA4_HUMAN	1	9	9	17	0.203
Heterogeneous nuclear ribonucleoprotein Q	HNRPQ_HUMAN	1	9	12	41	0.255
Protein transport protein Sec61 subunit beta	SC61B_HUMAN	1	2	3	6	0.271
DnaJ homolog subfamily A member 3, mitochondrial	DNJA3_HUMAN	1	6	8	12	0.169
3-hydroxyisobutyryl-CoA hydrolase, mitochondrial	HIBCH_HUMAN	1	4	4	5	0.194
40S ribosomal protein S16	RS16_HUMAN	1	6	6	17	0.377
Signal recognition particle receptor subunit beta	SRPRB_HUMAN	1	6	6	7	0.299
Clathrin heavy chain 1	CLH1_HUMAN	1	6	6	13	0.0758
Polypyrimidine tract-binding protein 1	PTBP1_HUMAN	1	10	11	21	0.386
40S ribosomal protein S15	RS15_HUMAN	1	4	6	19	0.552
U5 small nuclear ribonucleoprotein 200 kDa helicase	U520_HUMAN	1	3	4	5	0.0253
Thioredoxin-related transmembrane protein 1	TMX1_HUMAN	1	4	5	7	0.171
Hydroxyacyl-coenzyme A dehydrogenase, mitochondrial	HCDH_HUMAN	1	7	10	34	0.471
Cytochrome b-c1 complex subunit 1, mitochondrial	QCR1_HUMAN	1	13	17	37	0.421
Heat shock protein 75 kDa, mitochondrial	TRAP1_HUMAN	1	16	19	40	0.382
Guanine nucleotide-binding protein G(i) subunit alpha-2	GNAI2_HUMAN	1	7	9	25	0.589
ADP/ATP translocase 3	ADT3_HUMAN	1	3	6	52	0.456
60S ribosomal protein L23	RL23_HUMAN	1	8	9	14	0.579
Protein NipSnap homolog 2	NIPS2_HUMAN	1	2	2	4	0.129
Eukaryotic translation initiation factor 4B	IF4B_HUMAN	1	2	3	3	0.0622
ADP/ATP translocase 2	ADT2_HUMAN	1	7	11	44	0.507
Isochorismatase domain-containing protein 2, mitochondrial	ISOC2_HUMAN	1	2	3	9	0.239
Sarcoplasmic/endoplasmic reticulum calcium ATPase 2	AT2A2_HUMAN	1	15	16	17	0.172
60S ribosomal protein L6	RL6_HUMAN	1	8	11	44	0.309
Glucosidase 2 subunit beta	GLU2B_HUMAN	1	6	7	10	0.155
Protein NipSnap homolog 1	NIPS1_HUMAN	1	4	4	5	0.261
Lysosomal Pro-X carboxypeptidase	PCP_HUMAN	1	4	6	9	0.125
Integrin beta-5	ITB5_HUMAN	1	5	7	20	0.0964
SPRY domain-containing protein 4	SPRY4_HUMAN	1	2	2	2	0.222
Mitochondrial import receptor subunit TOM22 homolog	TOM22_HUMAN	1	3	4	10	0.338
Ras-related protein Rab-6A	RAB6A_HUMAN	1	2	2	6	0.178
Glutaredoxin-related protein 5, mitochondrial	GLRX5_HUMAN	1	2	4	11	0.21
Integrin beta-4	ITB4_HUMAN	1	7	7	8	0.0692
Plasminogen activator inhibitor 1	PAI1_HUMAN	1	8	8	9	0.336
Mitochondrial 2-oxoglutarate/malate carrier protein	M2OM_HUMAN	1	8	9	15	0.459
Microsomal glutathione S-transferase 3	MGST3_HUMAN	1	2	2	3	0.25
Very-long-chain enoyl-CoA reductase	TECR_HUMAN	1	3	3	9	0.0942
NADH dehydrogenase [ubiquinone] 1 alpha subcomplex subunit 13	NDUAD_HUMAN	1	3	4	11	0.264
LETM1 and EF-hand domain-containing protein 1, mitochondrial	LETM1_HUMAN	1	7	7	8	0.138
Histone H2A.x	H2AX_HUMAN	1	2	3	10	0.427
28S ribosomal protein S34, mitochondrial	RT34_HUMAN	1	2	2	4	0.0734
Cytochrome c oxidase subunit 6C	COX6C_HUMAN	1	1	1	1	0.12
Na(+)/H(+) exchange regulatory cofactor NHE-RF1	NHRF1_HUMAN	1	2	2	2	0.067
Microtubule-actin cross-linking factor 1, isoforms 1/2/3/5	MACF1_HUMAN	1	7	8	10	0.0204
Nucleophosmin	NPM_HUMAN	1	3	5	13	0.214
Electron transfer flavoprotein subunit alpha, mitochondrial	ETFA_HUMAN	1	11	15	32	0.526
39S ribosomal protein L19, mitochondrial	RM19_HUMAN	1	4	4	6	0.154
AFG3-like protein 2	AFG32_HUMAN	1	4	4	6	0.079
Mitochondrial import inner membrane translocase subunit TIM44	TIM44_HUMAN	1	8	9	15	0.199
Inorganic pyrophosphatase 2, mitochondrial	IPYR2_HUMAN	1	3	4	7	0.111
Solute carrier family 2, facilitated glucose transporter member 1	GTR1_HUMAN	1	10	16	54	0.256
Annexin A11	ANX11_HUMAN	1	3	4	5	0.0693
TAR DNA-binding protein 43	TADBP_HUMAN	1	5	5	7	0.244
ATP synthase subunit beta, mitochondrial	ATPB_HUMAN	1	25	41	166	0.783
Peroxisomal multifunctional enzyme type 2	DHB4_HUMAN	1	8	9	10	0.221
40S ribosomal protein S7	RS7_HUMAN	1	5	8	29	0.381
Band 4.1-like protein 2	E41L2_HUMAN	1	6	6	6	0.0687
Surfeit locus protein 4	SURF4_HUMAN	1	3	4	5	0.152
Mitochondrial ribonuclease P protein 1	MRRP1_HUMAN	1	3	4	4	0.0918
Coiled-coil domain-containing protein 47	CCD47_HUMAN	1	3	4	7	0.0952
Peptidyl-prolyl cis-trans isomerase B	PPIB_HUMAN	1	8	11	27	0.444
Probable arginine--tRNA ligase, mitochondrial	SYRM_HUMAN	1	2	3	3	0.0502
Heat shock protein HSP 90-alpha	HS90A_HUMAN	1	4	7	21	0.163
Interleukin enhancer-binding factor 2	ILF2_HUMAN	1	3	4	5	0.133
Neutral alpha-glucosidase AB	GANAB_HUMAN	1	23	29	52	0.415
Cation-dependent mannose-6-phosphate receptor	MPRD_HUMAN	1	2	3	3	0.116
NADH dehydrogenase [ubiquinone] iron-sulfur protein 2, mitochondrial	NDUS2_HUMAN	1	5	6	9	0.194
ATP-dependent RNA helicase DDX1	DDX1_HUMAN	1	9	11	15	0.15
Pyruvate dehydrogenase phosphatase regulatory subunit, mitochondrial	PDPR_HUMAN	1	2	2	2	0.0387
Solute carrier family 25 member 40	S2540_HUMAN	1	2	2	2	0.124
Mitochondrial intermediate peptidase	MIPEP_HUMAN	1	3	3	3	0.0785
Calcium-binding mitochondrial carrier protein Aralar2	CMC2_HUMAN	1	19	23	63	0.519
Calcium-binding mitochondrial carrier protein Aralar1	CMC1_HUMAN	1	3	3	10	0.168
Protein disulfide-isomerase A6	PDIA6_HUMAN	1	12	17	44	0.343
Plasma membrane calcium-transporting ATPase 1	AT2B1_HUMAN	1	3	3	3	0.0445
Serine/threonine-protein phosphatase PGAM5, mitochondrial	PGAM5_HUMAN	1	4	4	5	0.111
Mitochondrial import receptor subunit TOM70	TOM70_HUMAN	1	4	5	7	0.0773
Leukocyte surface antigen CD47	CD47_HUMAN	1	2	2	2	0.0588
Splicing factor 3B subunit 1	SF3B1_HUMAN	1	3	3	3	0.0437
Ribosomal L1 domain-containing protein 1	RL1D1_HUMAN	1	2	2	5	0.0816
40S ribosomal protein S17-like	RS17L_HUMAN	1	3	4	12	0.43
Calreticulin	CALR_HUMAN	1	8	9	23	0.35
Mitochondrial-processing peptidase subunit alpha	MPPA_HUMAN	1	7	8	17	0.215
GTPase KRas	RASK_HUMAN	1	1	1	7	0.413
Transcription factor A, mitochondrial	TFAM_HUMAN	1	5	7	11	0.207
Cytochrome b-c1 complex subunit 2, mitochondrial	QCR2_HUMAN	1	12	16	31	0.442
Vimentin	VIME_HUMAN	1	9	11	23	0.258
Torsin-1A-interacting protein 2	TOIP2_HUMAN	1	2	2	2	0.106
3-ketoacyl-CoA thiolase, peroxisomal	THIK_HUMAN	1	2	2	4	0.0495
AP-2 complex subunit beta	AP2B1_HUMAN	1	0	0	4	0.0288
Tyrosine--tRNA ligase, mitochondrial	SYYM_HUMAN	1	7	8	11	0.285
Poly(rC)-binding protein 2	PCBP2_HUMAN	1	6	7	29	0.405
60S ribosomal protein L8	RL8_HUMAN	1	6	7	9	0.335
60S ribosomal protein L28	RL28_HUMAN	1	3	3	3	0.219
60S ribosomal protein L24	RL24_HUMAN	1	3	3	7	0.191
Alpha-actinin-4	ACTN4_HUMAN	1	15	18	73	0.432
Integrin alpha-V	ITAV_HUMAN	1	8	8	10	0.122
60S ribosomal protein L7	RL7_HUMAN	1	9	13	36	0.383
Insulin-like growth factor 2 mRNA-binding protein 2	IF2B2_HUMAN	1	3	4	9	0.0918
Sorbitol dehydrogenase	DHSO_HUMAN	1	3	3	3	0.143
Actin-related protein 2	ARP2_HUMAN	1	2	2	2	0.122
Elongation factor 1-alpha 1	EF1A1_HUMAN	1	9	17	102	0.474
Lanosterol 14-alpha demethylase	CP51A_HUMAN	1	6	7	8	0.207
Cleavage and polyadenylation specificity factor subunit 5	CPSF5_HUMAN	1	2	3	8	0.163
Glutaminase kidney isoform, mitochondrial	GLSK_HUMAN	1	20	24	52	0.39
NADH dehydrogenase [ubiquinone] flavoprotein 1, mitochondrial	NDUV1_HUMAN	1	5	7	15	0.209
ATPase family AAA domain-containing protein 3A	ATD3A_HUMAN	1	4	5	15	0.156
Ras-related protein Rab-10	RAB10_HUMAN	1	2	3	11	0.215
NADH dehydrogenase [ubiquinone] iron-sulfur protein 7, mitochondrial	NDUS7_HUMAN	1	2	3	3	0.192
Cytochrome c oxidase subunit 7A2, mitochondrial	CX7A2_HUMAN	1	3	3	7	0.566
Prohibitin	PHB_HUMAN	1	14	22	95	0.757
CD44 antigen	CD44_HUMAN	1	4	4	6	0.0647
HIG1 domain family member 1A, mitochondrial	HIG1A_HUMAN	1	2	3	12	0.258
39S ribosomal protein L45, mitochondrial	RM45_HUMAN	1	3	3	3	0.154
Coproporphyrinogen-III oxidase, mitochondrial	HEM6_HUMAN	1	4	4	4	0.137
Zinc transporter ZIP14	S39AE_HUMAN	1	2	2	2	0.065
Beta-hexosaminidase subunit beta	HEXB_HUMAN	1	9	9	15	0.257
39S ribosomal protein L44, mitochondrial	RM44_HUMAN	1	5	6	13	0.157
Solute carrier family 2, facilitated glucose transporter member 3	GTR3_HUMAN	1	10	14	35	0.218
ATP synthase subunit delta, mitochondrial	ATPD_HUMAN	1	4	5	10	0.583
N-acetylglucosamine-6-sulfatase	GNS_HUMAN	1	2	2	2	0.0453
40S ribosomal protein S9	RS9_HUMAN	1	6	6	8	0.258
60S ribosomal protein L12	RL12_HUMAN	1	6	10	29	0.545
40S ribosomal protein S8	RS8_HUMAN	1	7	12	29	0.447
ADP-ribosylation factor-like protein 8B	ARL8B_HUMAN	1	1	1	4	0.226
Nuclease-sensitive element-binding protein 1	YBOX1_HUMAN	1	4	6	8	0.309
39S ribosomal protein L22, mitochondrial	RM22_HUMAN	1	1	1	1	0.0583
Oligoribonuclease, mitochondrial	ORN_HUMAN	1	2	2	2	0.118
39S ribosomal protein L21, mitochondrial	RM21_HUMAN	1	2	2	2	0.141
Mitochondrial import inner membrane translocase subunit Tim23	TIM23_HUMAN	1	3	3	4	0.349
Heat shock protein HSP 90-beta	HS90B_HUMAN	1	1	1	19	0.101
Interleukin enhancer-binding factor 3	ILF3_HUMAN	1	5	5	5	0.0895
Peroxiredoxin-1	PRDX1_HUMAN	1	7	9	31	0.523
Protein SCO1 homolog, mitochondrial	SCO1_HUMAN	1	2	2	3	0.103
Methylcrotonoyl-CoA carboxylase beta chain, mitochondrial	MCCB_HUMAN	1	8	10	15	0.243
Caprin-1	CAPR1_HUMAN	1	7	9	15	0.131
Cytochrome c oxidase subunit 7A-related protein, mitochondrial	COX7R_HUMAN	1	3	3	3	0.614
Heterogeneous nuclear ribonucleoprotein H	HNRH1_HUMAN	1	6	7	22	0.287
Caseinolytic peptidase B protein homolog	CLPB_HUMAN	1	8	8	8	0.197
Dolichyl-diphosphooligosaccharide--protein glycosyltransferase subunit STT3B	STT3B_HUMAN	1	2	2	2	0.04
Hypoxia up-regulated protein 1	HYOU1_HUMAN	1	19	24	51	0.316
Heterogeneous nuclear ribonucleoproteins C1/C2	HNRPC_HUMAN	1	2	3	9	0.199
Signal recognition particle receptor subunit alpha	SRPR_HUMAN	1	6	7	9	0.135
Dolichyl-diphosphooligosaccharide--protein glycosyltransferase subunit STT3A	STT3A_HUMAN	1	3	3	4	0.0681
Ornithine aminotransferase, mitochondrial	OAT_HUMAN	1	14	16	31	0.56
Serine protease HTRA2, mitochondrial	HTRA2_HUMAN	1	2	2	3	0.0808
Aspartate--tRNA ligase, mitochondrial	SYDM_HUMAN	1	5	5	8	0.0977
Elongation factor Ts, mitochondrial	EFTS_HUMAN	1	7	8	10	0.342
40S ribosomal protein S19	RS19_HUMAN	1	6	8	20	0.359
40S ribosomal protein S18	RS18_HUMAN	1	3	3	5	0.171
40S ribosomal protein S15a	RS15A_HUMAN	1	4	4	5	0.277
7-dehydrocholesterol reductase	DHCR7_HUMAN	1	3	3	3	0.0674
ATP-dependent Clp protease ATP-binding subunit clpX-like, mitochondrial	CLPX_HUMAN	1	3	3	3	0.0521
60S ribosomal protein L27	RL27_HUMAN	1	5	5	9	0.426
ATP-dependent RNA helicase DDX3X	DDX3X_HUMAN	1	8	9	17	0.165
Protein transport protein Sec61 subunit alpha isoform 1	S61A1_HUMAN	1	6	9	16	0.191
Ras-related protein Rab-7a	RAB7A_HUMAN	1	10	12	28	0.614
60S ribosomal protein L26	RL26_HUMAN	1	4	4	7	0.269
60S ribosomal protein L9	RL9_HUMAN	1	7	11	32	0.474
KH domain-containing, RNA-binding, signal transduction-associated protein 1	KHDR1_HUMAN	1	2	3	3	0.0971
39S ribosomal protein L16, mitochondrial	RM16_HUMAN	1	2	2	4	0.112
Peptidyl-tRNA hydrolase 2, mitochondrial	PTH2_HUMAN	1	6	6	7	0.447
40S ribosomal protein S20	RS20_HUMAN	1	3	5	9	0.227
Reticulocalbin-1	RCN1_HUMAN	1	6	8	9	0.299
Stimulated by retinoic acid gene 6 protein homolog	STRA6_HUMAN	1	2	2	2	0.0555
NADH dehydrogenase [ubiquinone] flavoprotein 2, mitochondrial	NDUV2_HUMAN	1	2	2	4	0.0924
Cation-independent mannose-6-phosphate receptor	MPRI_HUMAN	1	3	3	4	0.0145
Adipocyte plasma membrane-associated protein	APMAP_HUMAN	1	7	7	11	0.233
Ubiquitin-40S ribosomal protein S27a	RS27A_HUMAN	1	4	4	6	0.365
NADH dehydrogenase [ubiquinone] iron-sulfur protein 8, mitochondrial	NDUS8_HUMAN	1	2	2	4	0.152
Protein NDRG1	NDRG1_HUMAN	1	2	2	2	0.0761
Dehydrogenase/reductase SDR family member 2	DHRS2_HUMAN	1	5	5	8	0.236
Annexin A2	ANXA2_HUMAN	1	9	15	349	0.687
Cat eye syndrome critical region protein 5	CECR5_HUMAN	1	8	9	16	0.336
Guanine nucleotide-binding protein G(s) subunit alpha isoforms XLas	GNAS1_HUMAN	1	8	9	22	0.118
39S ribosomal protein L46, mitochondrial	RM46_HUMAN	1	2	2	2	0.176
Cytosol aminopeptidase	AMPL_HUMAN	1	3	3	5	0.0829
Protein LYRIC	LYRIC_HUMAN	1	2	2	2	0.0378
Pentatricopeptide repeat domain-containing protein 3, mitochondrial	PTCD3_HUMAN	1	8	10	25	0.2
NADH-ubiquinone oxidoreductase 75 kDa subunit, mitochondrial	NDUS1_HUMAN	1	15	17	28	0.352
Coiled-coil-helix-coiled-coil-helix domain-containing protein 2, mitochondrial	CHCH2_HUMAN	1	1	1	1	0.0861
Plectin	PLEC_HUMAN	1	15	15	18	0.0504
ATP-dependent RNA helicase A	DHX9_HUMAN	1	12	14	33	0.146
O-acetyl-ADP-ribose deacetylase MACROD1	MACD1_HUMAN	1	3	3	3	0.16
Phosphate carrier protein, mitochondrial	MPCP_HUMAN	1	10	12	36	0.329
Transforming protein RhoA	RHOA_HUMAN	1	2	2	5	0.233
Thioredoxin-dependent peroxide reductase, mitochondrial	PRDX3_HUMAN	1	9	11	31	0.406
Phosphoenolpyruvate carboxykinase [GTP], mitochondrial	PCKGM_HUMAN	1	4	4	5	0.0844
Peroxiredoxin-2	PRDX2_HUMAN	1	3	3	7	0.187
Golgi apparatus protein 1	GSLG1_HUMAN	1	3	3	3	0.0356
Translocation protein SEC63 homolog	SEC63_HUMAN	1	3	3	3	0.0579
Heterogeneous nuclear ribonucleoprotein H3	HNRH3_HUMAN	1	2	3	5	0.0896
Citrate synthase, mitochondrial	CISY_HUMAN	1	16	25	77	0.53
Eukaryotic translation initiation factor 3 subunit A	EIF3A_HUMAN	1	3	4	5	0.0253
Sodium/potassium-transporting ATPase subunit beta-1	AT1B1_HUMAN	1	2	2	2	0.0825
Superoxide dismutase [Mn], mitochondrial	SODM_HUMAN	1	2	3	6	0.234
Polymerase delta-interacting protein 2	PDIP2_HUMAN	1	5	5	6	0.217
Ras-related protein Rab-11A	RB11A_HUMAN	1	2	2	3	0.106
Protein S100-A13	S10AD_HUMAN	1	1	1	1	0.112
39S ribosomal protein L1, mitochondrial	RM01_HUMAN	1	3	4	6	0.132
Elongation factor Tu, mitochondrial	EFTU_HUMAN	1	23	34	82	0.628
Heterogeneous nuclear ribonucleoprotein U	HNRPU_HUMAN	1	9	12	24	0.172
Dihydrolipoyl dehydrogenase, mitochondrial	DLDH_HUMAN	1	7	10	25	0.23
Enoyl-CoA hydratase, mitochondrial	ECHM_HUMAN	1	3	5	9	0.162
Fatty acid synthase	FAS_HUMAN	1	3	3	4	0.0247
Leucine-rich PPR motif-containing protein, mitochondrial	LPPRC_HUMAN	1	55	79	218	0.522
Probable ATP-dependent RNA helicase DDX5	DDX5_HUMAN	1	3	3	8	0.109
60S acidic ribosomal protein P0	RLA0_HUMAN	1	10	14	32	0.473
RNA-binding protein 39	RBM39_HUMAN	1	2	2	2	0.0396
Vigilin	VIGLN_HUMAN	1	4	4	4	0.0513
60S ribosomal protein L10a	RL10A_HUMAN	1	7	8	20	0.336
Galectin-3-binding protein	LG3BP_HUMAN	1	2	2	3	0.0513
40S ribosomal protein S21	RS21_HUMAN	1	3	3	4	0.241
EH domain-containing protein 4	EHD4_HUMAN	1	3	3	3	0.0739
Peptidyl-prolyl cis-trans isomerase FKBP3	FKBP3_HUMAN	1	2	2	3	0.0848
Isovaleryl-CoA dehydrogenase, mitochondrial	IVD_HUMAN	1	3	5	5	0.163
60S ribosomal protein L30	RL30_HUMAN	1	4	5	8	0.513
Guanine nucleotide-binding protein subunit beta-2-like 1	GBLP_HUMAN	1	15	17	31	0.656
2-oxoglutarate dehydrogenase, mitochondrial	ODO1_HUMAN	1	8	9	26	0.216
39S ribosomal protein L47, mitochondrial	RM47_HUMAN	1	1	1	2	0.048
ATP synthase subunit gamma, mitochondrial	ATPG_HUMAN	1	6	7	12	0.289
ATP synthase-coupling factor 6, mitochondrial	ATP5J_HUMAN	1	2	2	4	0.269
28S ribosomal protein S17, mitochondrial	RT17_HUMAN	1	1	1	1	0.0692
Pituitary tumor-transforming gene 1 protein-interacting protein	PTTG_HUMAN	1	2	3	6	0.167
Transmembrane emp24 domain-containing protein 10	TMEDA_HUMAN	1	4	5	8	0.224
Inactive hydroxysteroid dehydrogenase-like protein 1	HSDL1_HUMAN	1	2	2	2	0.103
Neuroblast differentiation-associated protein AHNAK	AHNK_HUMAN	1	144	169	287	0.335
Single-stranded DNA-binding protein, mitochondrial	SSBP_HUMAN	1	4	5	12	0.345
Coiled-coil-helix-coiled-coil-helix domain-containing protein 3, mitochondrial	CHCH3_HUMAN	1	3	3	5	0.172
DNA-directed RNA polymerase, mitochondrial	RPOM_HUMAN	1	2	3	5	0.0203
RNA-binding motif protein, X chromosome	RBMX_HUMAN	1	3	3	5	0.0895
Mitochondrial import inner membrane translocase subunit TIM50	TIM50_HUMAN	1	6	9	28	0.232
Ribosome-binding protein 1	RRBP1_HUMAN	1	9	9	9	0.0865
Rho-related GTP-binding protein RhoB	RHOB_HUMAN	1	3	3	5	0.204
Peroxiredoxin-4	PRDX4_HUMAN	1	4	4	11	0.266
Ras-related protein Rab-2A	RAB2A_HUMAN	1	3	3	4	0.189
Protein TBRG4	TBRG4_HUMAN	1	8	10	14	0.287
Catechol O-methyltransferase	COMT_HUMAN	1	2	2	2	0.114
Glycine cleavage system H protein, mitochondrial	GCSH_HUMAN	1	3	3	5	0.387
Sodium/potassium-transporting ATPase subunit beta-3	AT1B3_HUMAN	1	6	9	23	0.369
NADH dehydrogenase [ubiquinone] iron-sulfur protein 3, mitochondrial	NDUS3_HUMAN	1	10	12	19	0.538
Eukaryotic translation initiation factor 3 subunit B	EIF3B_HUMAN	1	2	3	3	0.0504
Double-stranded RNA-binding protein Staufen homolog 1	STAU1_HUMAN	1	2	3	3	0.0399
HIG1 domain family member 2A, mitochondrial	HIG2A_HUMAN	1	2	4	6	0.434
GrpE protein homolog 1, mitochondrial	GRPE1_HUMAN	1	5	5	8	0.258
39S ribosomal protein L3, mitochondrial	RM03_HUMAN	1	1	1	1	0.0402
Isocitrate dehydrogenase [NAD] subunit alpha, mitochondrial	IDH3A_HUMAN	1	8	9	16	0.292
Glycylpeptide N-tetradecanoyltransferase 1	NMT1_HUMAN	1	2	2	2	0.0806
Fumarate hydratase, mitochondrial	FUMH_HUMAN	1	9	10	14	0.392
Cytochrome c oxidase subunit 6B1	CX6B1_HUMAN	1	4	6	14	0.442
CUB domain-containing protein 1	CDCP1_HUMAN	1	7	7	11	0.128
G-rich sequence factor 1	GRSF1_HUMAN	1	7	10	20	0.252
Peptidyl-tRNA hydrolase ICT1, mitochondrial	ICT1_HUMAN	1	2	2	2	0.107
Serine/threonine-protein phosphatase PP1-alpha catalytic subunit	PP1A_HUMAN	1	2	2	14	0.197
Cytochrome b-c1 complex subunit 7	QCR7_HUMAN	1	2	2	2	0.207
Cathepsin L1	CATL1_HUMAN	1	3	3	5	0.153
Extended synaptotagmin-1	ESYT1_HUMAN	1	20	24	46	0.296
Transferrin receptor protein 1	TFR1_HUMAN	1	29	42	128	0.53
Monofunctional C1-tetrahydrofolate synthase, mitochondrial	C1TM_HUMAN	1	7	8	11	0.137
60S acidic ribosomal protein P2	RLA2_HUMAN	1	6	10	37	0.774
Sorting and assembly machinery component 50 homolog	SAM50_HUMAN	1	2	2	2	0.0554
Probable ATP-dependent RNA helicase DDX6	DDX6_HUMAN	1	2	2	3	0.0455
60S acidic ribosomal protein P1	RLA1_HUMAN	1	2	3	9	0.518
NADH dehydrogenase [ubiquinone] 1 beta subcomplex subunit 3	NDUB3_HUMAN	1	1	1	1	0.112
40S ribosomal protein S24	RS24_HUMAN	1	3	3	9	0.286
UPF0568 protein C14orf166	CN166_HUMAN	1	4	6	11	0.234
Endoplasmic reticulum resident protein 44	ERP44_HUMAN	1	2	2	2	0.131
Beta-hexosaminidase subunit alpha	HEXA_HUMAN	1	2	2	3	0.0718
40S ribosomal protein S23	RS23_HUMAN	1	2	2	4	0.266
Transketolase	TKT_HUMAN	1	4	4	4	0.0883
Mimitin, mitochondrial	MIMIT_HUMAN	1	2	2	2	0.142
SRA stem-loop-interacting RNA-binding protein, mitochondrial	SLIRP_HUMAN	1	6	8	16	0.688
Ras-related protein Rab-35	RAB35_HUMAN	1	2	3	8	0.274
60S ribosomal protein L31	RL31_HUMAN	1	3	4	5	0.248
Cytochrome c oxidase subunit 4 isoform 1, mitochondrial	COX41_HUMAN	1	3	3	3	0.195
Acyl carrier protein, mitochondrial	ACPM_HUMAN	1	4	4	6	0.237
Annexin A5	ANXA5_HUMAN	1	4	6	9	0.172
Elongation factor G, mitochondrial	EFGM_HUMAN	1	15	17	27	0.333
39S ribosomal protein L49, mitochondrial	RM49_HUMAN	1	2	2	3	0.157
Dihydrolipoyllysine-residue succinyltransferase component of 2-oxoglutarate dehydrogenase complex, mitochondrial	ODO2_HUMAN	1	6	7	11	0.168
Annexin A4	ANXA4_HUMAN	1	3	3	4	0.125
Alpha-aminoadipic semialdehyde dehydrogenase	AL7A1_HUMAN	1	4	4	4	0.152
Translational activator GCN1	GCN1L_HUMAN	1	3	5	7	0.018
Medium-chain specific acyl-CoA dehydrogenase, mitochondrial	ACADM_HUMAN	1	7	8	9	0.259
ATP synthase subunit d, mitochondrial	ATP5H_HUMAN	1	6	9	22	0.54
Large neutral amino acids transporter small subunit 1	LAT1_HUMAN	1	5	7	16	0.168
10 kDa heat shock protein, mitochondrial	CH10_HUMAN	1	7	8	29	0.588
V-type proton ATPase catalytic subunit A	VATA_HUMAN	1	2	2	2	0.047
NADH dehydrogenase [ubiquinone] 1 beta subcomplex subunit 10	NDUBA_HUMAN	1	2	2	3	0.14
Cytoplasmic dynein 1 heavy chain 1	DYHC1_HUMAN	1	1	1	1	0.00344
Mitotic checkpoint protein BUB3	BUB3_HUMAN	1	2	2	2	0.0793
Hydroxysteroid dehydrogenase-like protein 2	HSDL2_HUMAN	1	2	2	2	0.0885
GDP-fucose protein O-fucosyltransferase 1	OFUT1_HUMAN	1	3	3	4	0.157
Eukaryotic initiation factor 4A-I	IF4A1_HUMAN	1	2	2	5	0.192
ES1 protein homolog, mitochondrial	ES1_HUMAN	1	2	3	4	0.187
Acyl-CoA synthetase family member 2, mitochondrial	ACSF2_HUMAN	1	2	2	2	0.0683
Cytochrome c	CYC_HUMAN	1	6	10	33	0.495
Serpin H1	SERPH_HUMAN	1	17	26	69	0.608
Ubiquinol-cytochrome c reductase complex chaperone CBP3 homolog	UQCC_HUMAN	1	2	2	3	0.0702
Peroxiredoxin-5, mitochondrial	PRDX5_HUMAN	1	6	7	10	0.393
Proliferation-associated protein 2G4	PA2G4_HUMAN	1	12	18	31	0.363
Septin-2	SEPT2_HUMAN	1	7	11	28	0.324
Carboxypeptidase D	CBPD_HUMAN	1	2	3	4	0.0181
Alkyldihydroxyacetonephosphate synthase, peroxisomal	ADAS_HUMAN	1	10	10	12	0.234
Polyadenylate-binding protein 1	PABP1_HUMAN	1	5	6	42	0.344
Serine/threonine-protein kinase 24	STK24_HUMAN	1	3	3	3	0.147
Translocon-associated protein subunit alpha	SSRA_HUMAN	1	2	3	5	0.0804
Mitochondrial import inner membrane translocase subunit Tim8 A	TIM8A_HUMAN	1	2	2	2	0.227
Prohibitin-2	PHB2_HUMAN	1	14	21	72	0.589
39S ribosomal protein L4, mitochondrial	RM04_HUMAN	1	5	5	6	0.273
Succinyl-CoA ligase [ADP/GDP-forming] subunit alpha, mitochondrial	SUCA_HUMAN	1	6	8	10	0.249
Mitochondrial assembly of ribosomal large subunit protein 1	MASU1_HUMAN	1	2	2	3	0.137
Enoyl-CoA delta isomerase 2, mitochondrial	ECI2_HUMAN	1	2	2	2	0.0711
78 kDa glucose-regulated protein	GRP78_HUMAN	1	22	37	134	0.518
Histone H2A type 2-A	H2A2A_HUMAN	1	3	6	39	0.523
Tyrosine-protein phosphatase non-receptor type 1	PTN1_HUMAN	1	7	7	7	0.274
Plasminogen activator inhibitor 1 RNA-binding protein	PAIRB_HUMAN	1	2	2	2	0.076
Delta(24)-sterol reductase	DHC24_HUMAN	1	2	2	3	0.0678
Keratin, type I cytoskeletal 18	K1C18_HUMAN	1	12	15	36	0.365
CD97 antigen	CD97_HUMAN	1	5	7	12	0.0898
Alpha/beta hydrolase domain-containing protein 11	ABHDB_HUMAN	1	2	2	2	0.105
Diablo homolog, mitochondrial	DBLOH_HUMAN	1	3	3	4	0.218
NADH dehydrogenase [ubiquinone] 1 alpha subcomplex subunit 6	NDUA6_HUMAN	1	2	2	2	0.156
Cytochrome b-c1 complex subunit 9	QCR9_HUMAN	1	1	1	1	0.27
Ras-related protein R-Ras2	RRAS2_HUMAN	1	2	2	2	0.118
NADH dehydrogenase [ubiquinone] 1 alpha subcomplex subunit 5	NDUA5_HUMAN	1	3	4	6	0.448
4-hydroxyphenylpyruvate dioxygenase-like protein	HPDL_HUMAN	1	12	13	16	0.509
Thioredoxin domain-containing protein 5	TXND5_HUMAN	1	7	7	9	0.199
Disks large homolog 1	DLG1_HUMAN	1	3	3	4	0.0442
Oxysterol-binding protein-related protein 8	OSBL8_HUMAN	1	2	2	2	0.0214
Cytochrome c oxidase subunit 2	COX2_HUMAN	1	3	3	10	0.26
Mitochondrial-processing peptidase subunit beta	MPPB_HUMAN	1	7	8	10	0.225
60S ribosomal protein L27a	RL27A_HUMAN	1	4	4	10	0.223
Polyribonucleotide nucleotidyltransferase 1, mitochondrial	PNPT1_HUMAN	1	7	8	11	0.12
GTP-binding protein 10	GTPBA_HUMAN	1	3	3	3	0.0956
L-2-hydroxyglutarate dehydrogenase, mitochondrial	L2HDH_HUMAN	1	2	2	2	0.0778
40S ribosomal protein S25	RS25_HUMAN	1	4	4	9	0.24
ADP-ribosylation factor-like protein 6-interacting protein 1	AR6P1_HUMAN	1	2	2	4	0.187
Phenylalanine--tRNA ligase alpha subunit	SYFA_HUMAN	1	2	3	3	0.0748
60S ribosomal protein L32	RL32_HUMAN	1	5	5	7	0.341
Annexin A6	ANXA6_HUMAN	1	26	34	74	0.513
Uncharacterized aarF domain-containing protein kinase 4	ADCK4_HUMAN	1	2	2	4	0.079
ATP synthase subunit f, mitochondrial	ATPK_HUMAN	1	2	2	4	0.255
Vacuolar protein sorting-associated protein 35	VPS35_HUMAN	1	4	4	4	0.0616
Histidine triad nucleotide-binding protein 2, mitochondrial	HINT2_HUMAN	1	4	5	6	0.417
Electron transfer flavoprotein subunit beta	ETFB_HUMAN	1	7	9	18	0.329
Matrin-3	MATR3_HUMAN	1	7	10	23	0.169
39S ribosomal protein L53, mitochondrial	RM53_HUMAN	1	3	3	4	0.321
NADPH:adrenodoxin oxidoreductase, mitochondrial	ADRO_HUMAN	1	5	5	5	0.185
60S ribosomal protein L10	RL10_HUMAN	1	5	5	7	0.285
Cytochrome c oxidase protein 20 homolog	COX20_HUMAN	1	2	2	4	0.22
RNA-binding protein Musashi homolog 2	MSI2H_HUMAN	1	2	2	3	0.0945
Sideroflexin-1	SFXN1_HUMAN	1	11	14	27	0.525
Elongation factor 1-beta	EF1B_HUMAN	1	4	5	5	0.307
Scavenger receptor class B member 1	SCRB1_HUMAN	1	2	2	2	0.0362
Talin-1	TLN1_HUMAN	1	3	3	4	0.0307
Cytochrome c oxidase subunit 7C, mitochondrial	COX7C_HUMAN	1	2	3	7	0.413
ERO1-like protein alpha	ERO1A_HUMAN	1	4	4	4	0.103
Heterogeneous nuclear ribonucleoprotein D0	HNRPD_HUMAN	1	5	5	14	0.18
28S ribosomal protein S22, mitochondrial	RT22_HUMAN	1	6	7	9	0.278
Heat shock cognate 71 kDa protein	HSP7C_HUMAN	1	12	15	37	0.348
tRNA-splicing ligase RtcB homolog	RTCB_HUMAN	1	2	2	2	0.0871
Insulin-like growth factor 2 mRNA-binding protein 1	IF2B1_HUMAN	1	11	11	14	0.274
Palmitoyl-protein thioesterase 1	PPT1_HUMAN	1	4	5	10	0.261
Eukaryotic translation initiation factor 3 subunit F	EIF3F_HUMAN	1	2	2	2	0.084
Metaxin-1	MTX1_HUMAN	1	3	3	5	0.0837
Pyruvate dehydrogenase E1 component subunit beta, mitochondrial	ODPB_HUMAN	1	9	11	22	0.37
Eukaryotic translation initiation factor 3 subunit E	EIF3E_HUMAN	1	2	2	4	0.0719
Sodium bicarbonate cotransporter 3	S4A7_HUMAN	1	6	6	7	0.0857
Pyruvate dehydrogenase E1 component subunit alpha, somatic form, mitochondrial	ODPA_HUMAN	1	7	8	15	0.305
Glutathione S-transferase kappa 1	GSTK1_HUMAN	1	2	2	2	0.111
Succinate dehydrogenase [ubiquinone] iron-sulfur subunit, mitochondrial	DHSB_HUMAN	1	5	7	11	0.207
Cystatin-F	CYTF_HUMAN	1	2	2	5	0.241
D-beta-hydroxybutyrate dehydrogenase, mitochondrial	BDH_HUMAN	1	3	3	3	0.137
Succinate dehydrogenase [ubiquinone] flavoprotein subunit, mitochondrial	DHSA_HUMAN	1	12	14	28	0.291
NADH dehydrogenase [ubiquinone] 1 alpha subcomplex subunit 8	NDUA8_HUMAN	1	3	3	5	0.227
Pyruvate dehydrogenase protein X component, mitochondrial	ODPX_HUMAN	1	3	3	5	0.0619
Sterol-4-alpha-carboxylate 3-dehydrogenase, decarboxylating	NSDHL_HUMAN	1	2	2	2	0.113
Fructose-bisphosphate aldolase A	ALDOA_HUMAN	1	14	22	62	0.607
Succinyl-CoA ligase [GDP-forming] subunit beta, mitochondrial	SUCB2_HUMAN	1	7	7	10	0.183
Beta-galactosidase	BGAL_HUMAN	1	3	3	3	0.0517
Cell division control protein 42 homolog	CDC42_HUMAN	1	2	2	5	0.199
Vesicle-associated membrane protein 8	VAMP8_HUMAN	1	2	2	2	0.19
60 kDa heat shock protein, mitochondrial	CH60_HUMAN	1	40	74	416	0.766
Tubulin alpha-1C chain	TBA1C_HUMAN	1	3	3	14	0.303
40S ribosomal protein S26	RS26_HUMAN	1	3	5	9	0.365
CAAX prenyl protease 1 homolog	FACE1_HUMAN	1	2	2	2	0.0568
Acyl-CoA dehydrogenase family member 9, mitochondrial	ACAD9_HUMAN	1	10	13	19	0.267
Transgelin-2	TAGL2_HUMAN	1	7	9	17	0.477
60S ribosomal protein L35	RL35_HUMAN	1	3	3	3	0.293
Phosphatidylinositide phosphatase SAC1	SAC1_HUMAN	1	2	2	3	0.0886
Spectrin beta chain, non-erythrocytic 1	SPTB2_HUMAN	1	13	14	17	0.069
Non-POU domain-containing octamer-binding protein	NONO_HUMAN	1	4	5	10	0.134
Reticulon-4	RTN4_HUMAN	1	2	2	6	0.0394
Heterogeneous nuclear ribonucleoprotein A/B	ROAA_HUMAN	1	2	3	8	0.0934
T-complex protein 1 subunit zeta	TCPZ_HUMAN	1	2	3	4	0.0866
Cytochrome c1, heme protein, mitochondrial	CY1_HUMAN	1	4	4	10	0.283
Ras-related protein Rab-21	RAB21_HUMAN	1	2	2	3	0.0533
Mitochondrial fission 1 protein	FIS1_HUMAN	1	3	3	6	0.237
Peflin	PEF1_HUMAN	1	2	2	2	0.144
Armadillo repeat-containing protein 10	ARM10_HUMAN	1	2	2	2	0.0816
Probable leucine--tRNA ligase, mitochondrial	SYLM_HUMAN	1	1	1	1	0.041
Neurofibromin	NF1_HUMAN	1	2	2	2	0.0127
Non-specific lipid-transfer protein	NLTP_HUMAN	1	4	5	6	0.0914
Dolichyl-diphosphooligosaccharide--protein glycosyltransferase 48 kDa subunit	OST48_HUMAN	1	12	13	23	0.421
60S ribosomal protein L11	RL11_HUMAN	1	3	4	9	0.281
Developmentally-regulated GTP-binding protein 1	DRG1_HUMAN	1	6	7	7	0.262
Far upstream element-binding protein 2	FUBP2_HUMAN	1	4	4	5	0.0745
Eukaryotic initiation factor 4A-III	IF4A3_HUMAN	1	3	4	5	0.141
Lysosome membrane protein 2	SCRB2_HUMAN	1	3	3	5	0.128
Cytochrome c-type heme lyase	CCHL_HUMAN	1	2	2	2	0.0933
Integrin alpha-3	ITA3_HUMAN	1	3	3	3	0.0419
Ras-related protein Rap-1b	RAP1B_HUMAN	1	1	1	19	0.62
Myosin light polypeptide 6	MYL6_HUMAN	1	3	4	9	0.424
28S ribosomal protein S23, mitochondrial	RT23_HUMAN	1	2	2	3	0.105
Vesicular integral-membrane protein VIP36	LMAN2_HUMAN	1	2	2	2	0.059
Cytochrome c oxidase subunit 5B, mitochondrial	COX5B_HUMAN	1	5	6	13	0.457
Importin subunit beta-1	IMB1_HUMAN	1	4	4	4	0.0799
Cytochrome c oxidase subunit 5A, mitochondrial	COX5A_HUMAN	1	5	8	17	0.447
Metaxin-2	MTX2_HUMAN	1	4	5	16	0.335
Polyadenylate-binding protein 4	PABP4_HUMAN	1	1	1	23	0.175
Translocon-associated protein subunit delta	SSRD_HUMAN	1	4	5	7	0.306
Dolichyl-diphosphooligosaccharide--protein glycosyltransferase subunit 1	RPN1_HUMAN	1	19	22	43	0.451
Mitochondrial carrier homolog 2	MTCH2_HUMAN	1	2	2	2	0.0726
Serine--tRNA ligase, mitochondrial	SYSM_HUMAN	1	14	17	32	0.39
Myoferlin	MYOF_HUMAN	1	8	8	9	0.049
Acyl-coenzyme A thioesterase 2, mitochondrial	ACOT2_HUMAN	1	3	3	4	0.141
Nascent polypeptide-associated complex subunit alpha	NACA_HUMAN	1	2	2	2	0.13
NADH dehydrogenase [ubiquinone] 1 alpha subcomplex subunit 9, mitochondrial	NDUA9_HUMAN	1	6	7	15	0.223
Profilin-1	PROF1_HUMAN	1	4	4	6	0.371
2-oxoisovalerate dehydrogenase subunit beta, mitochondrial	ODBB_HUMAN	1	2	2	2	0.0714
Stress-70 protein, mitochondrial	GRP75_HUMAN	1	25	39	117	0.588
Fructose-bisphosphate aldolase C	ALDOC_HUMAN	1	2	3	10	0.148
Probable glutamate--tRNA ligase, mitochondrial	SYEM_HUMAN	1	2	2	2	0.088
Keratin, type II cytoskeletal 1	K2C1_HUMAN	1	5	5	8	0.116
40S ribosomal protein S29	RS29_HUMAN	1	2	3	5	0.339
Eukaryotic translation initiation factor 5A-1	IF5A1_HUMAN	1	3	5	13	0.39
60S ribosomal protein L13a	RL13A_HUMAN	1	5	5	8	0.261
Glyceraldehyde-3-phosphate dehydrogenase	G3P_HUMAN	1	15	34	144	0.579
40S ribosomal protein S28	RS28_HUMAN	1	2	3	3	0.304
Putative cytochrome b-c1 complex subunit Rieske-like protein 1	UCRIL_HUMAN	1	3	4	16	0.148
Kinectin	KTN1_HUMAN	1	7	8	10	0.0648
Lanosterol synthase	ERG7_HUMAN	1	2	2	2	0.0369
Peptidyl-prolyl cis-trans isomerase A	PPIA_HUMAN	1	9	11	25	0.667
Desmoplakin	DESP_HUMAN	1	2	2	2	0.0153
FAS-associated factor 2	FAF2_HUMAN	1	7	8	12	0.256
RNA-binding protein EWS	EWS_HUMAN	1	3	3	3	0.0671
Transmembrane emp24 domain-containing protein 2	TMED2_HUMAN	1	2	2	4	0.204
GTPase Era, mitochondrial	ERAL1_HUMAN	1	2	2	2	0.0824
60S ribosomal protein L36	RL36_HUMAN	1	4	4	8	0.305
Tumor protein D54	TPD54_HUMAN	1	2	2	2	0.214
L-lactate dehydrogenase A chain	LDHA_HUMAN	1	9	11	26	0.434
Poly(rC)-binding protein 1	PCBP1_HUMAN	1	8	9	14	0.514
Glycerol-3-phosphate dehydrogenase, mitochondrial	GPDM_HUMAN	1	12	15	29	0.267
Protein QIL1	QIL1_HUMAN	1	1	1	1	0.271
Spectrin alpha chain, non-erythrocytic 1	SPTN1_HUMAN	1	14	16	22	0.0975
Minor histocompatibility antigen H13	HM13_HUMAN	1	2	2	4	0.0584
ATP synthase subunit O, mitochondrial	ATPO_HUMAN	1	7	9	22	0.441
Zinc finger CCCH-type antiviral protein 1	ZCCHV_HUMAN	1	2	2	2	0.0443
40S ribosomal protein S3a	RS3A_HUMAN	1	11	16	31	0.405
V-type proton ATPase subunit B, brain isoform	VATB2_HUMAN	1	2	3	3	0.0685
Ribonuclease UK114	UK114_HUMAN	1	2	2	2	0.255
Ephrin type-A receptor 2	EPHA2_HUMAN	1	12	12	14	0.179
60S ribosomal protein L14	RL14_HUMAN	1	4	5	17	0.209
Zyxin	ZYX_HUMAN	1	2	2	2	0.0542
60S ribosomal protein L13	RL13_HUMAN	1	5	5	8	0.261
NADPH--cytochrome P450 reductase	NCPR_HUMAN	1	3	3	4	0.105
Protein S100-A10	S10AA_HUMAN	1	3	6	46	0.454
Copine-3	CPNE3_HUMAN	1	8	8	10	0.192
FAST kinase domain-containing protein 2	FAKD2_HUMAN	1	4	4	4	0.069
60S ribosomal protein L37a	RL37A_HUMAN	1	2	2	3	0.326
Elongation factor 1-delta	EF1D_HUMAN	1	5	5	7	0.263
Dynamin-like 120 kDa protein, mitochondrial	OPA1_HUMAN	1	13	14	17	0.202
Histone H1.5	H15_HUMAN	1	2	2	2	0.106
Septin-7	SEPT7_HUMAN	1	4	4	8	0.211
Heme oxygenase 2	HMOX2_HUMAN	1	3	3	3	0.117
Calnexin	CALX_HUMAN	1	13	18	74	0.319
Histone H1.2	H12_HUMAN	1	1	1	2	0.108
Niemann-Pick C1 protein	NPC1_HUMAN	1	2	2	2	0.029
Protein DJ-1	PARK7_HUMAN	1	2	2	2	0.238
40S ribosomal protein S4, X isoform	RS4X_HUMAN	1	8	11	31	0.335
Putative ATP-dependent RNA helicase DHX30	DHX30_HUMAN	1	17	20	31	0.196
4F2 cell-surface antigen heavy chain	4F2_HUMAN	1	23	38	136	0.506
Glucose-6-phosphate isomerase	G6PI_HUMAN	1	9	11	20	0.294
Dolichyl-diphosphooligosaccharide--protein glycosyltransferase subunit 2	RPN2_HUMAN	1	15	22	54	0.469
DAZ-associated protein 1	DAZP1_HUMAN	1	2	2	2	0.0639
Ezrin	EZRI_HUMAN	1	11	15	41	0.326
Transitional endoplasmic reticulum ATPase	TERA_HUMAN	1	3	3	3	0.0521
28S ribosomal protein S2, mitochondrial	RT02_HUMAN	1	4	4	4	0.172
Aldehyde dehydrogenase X, mitochondrial	AL1B1_HUMAN	1	5	5	12	0.104
Vesicle-associated membrane protein-associated protein A	VAPA_HUMAN	1	4	7	27	0.257
Peroxisomal bifunctional enzyme	ECHP_HUMAN	1	4	4	6	0.0622
Syntaxin-binding protein 3	STXB3_HUMAN	1	3	4	6	0.0946
39S ribosomal protein L11, mitochondrial	RM11_HUMAN	1	2	2	2	0.167
Endoplasmin	ENPL_HUMAN	1	24	32	79	0.412
Tubulin alpha-4A chain	TBA4A_HUMAN	1	1	1	12	0.221
Hippocalcin-like protein 1	HPCL1_HUMAN	1	2	2	2	0.104
Sphingosine-1-phosphate lyase 1	SGPL1_HUMAN	1	2	3	3	0.0528
MAGUK p55 subfamily member 6	MPP6_HUMAN	1	4	4	4	0.0741
Pyrroline-5-carboxylate reductase 1, mitochondrial	P5CR1_HUMAN	1	2	2	10	0.11
Mesencephalic astrocyte-derived neurotrophic factor	MANF_HUMAN	1	5	5	8	0.231
Nodal modulator 1	NOMO1_HUMAN	1	2	2	24	0.203
60S ribosomal protein L38	RL38_HUMAN	1	3	5	14	0.5
Leucine-rich repeat-containing protein 59	LRC59_HUMAN	1	8	12	26	0.339
Apoptosis inhibitor 5	API5_HUMAN	1	2	2	2	0.0687
Protein FAM136A	F136A_HUMAN	1	2	2	3	0.203
L-lactate dehydrogenase B chain	LDHB_HUMAN	1	12	13	20	0.488
Ras-related protein Ral-A	RALA_HUMAN	1	4	4	6	0.277
40S ribosomal protein S11	RS11_HUMAN	1	4	6	9	0.316
Aspartate aminotransferase, mitochondrial	AATM_HUMAN	1	10	10	14	0.349
Cytochrome b5 type B	CYB5B_HUMAN	1	3	3	4	0.377
Dolichol-phosphate mannosyltransferase	DPM1_HUMAN	1	2	2	2	0.0885
60S ribosomal protein L36a	RL36A_HUMAN	1	1	1	1	0.0849
Coiled-coil domain-containing protein 58	CCD58_HUMAN	1	4	4	4	0.389
Protein BUD31 homolog	BUD31_HUMAN	1	2	2	2	0.194
CD81 antigen	CD81_HUMAN	1	2	4	5	0.182
14-3-3 protein zeta/delta	1433Z_HUMAN	1	2	2	5	0.2
THO complex subunit 4	THOC4_HUMAN	1	2	3	9	0.105
Condensin complex subunit 2	CND2_HUMAN	1	2	2	2	0.0567
Tubulin beta chain	TBB5_HUMAN	1	1	1	13	0.315
Plexin-B2	PLXB2_HUMAN	1	3	3	4	0.0267
Lysosome-associated membrane glycoprotein 1	LAMP1_HUMAN	1	4	5	8	0.0983
Guanine nucleotide-binding protein subunit alpha-11	GNA11_HUMAN	1	3	3	6	0.173
60S ribosomal protein L15	RL15_HUMAN	1	3	4	16	0.172
Condensin complex subunit 1	CND1_HUMAN	1	2	2	2	0.02
Alpha-enolase	ENOA_HUMAN	1	7	8	12	0.247
Elongation factor 1-gamma	EF1G_HUMAN	1	10	10	16	0.382
Filamin-A	FLNA_HUMAN	1	24	24	40	0.159
Trifunctional enzyme subunit beta, mitochondrial	ECHB_HUMAN	1	14	14	21	0.42
Protein S100-A11	S10AB_HUMAN	1	6	12	47	0.743
Ras-related protein Rab-5C	RAB5C_HUMAN	1	4	6	18	0.421
Integrin alpha-6	ITA6_HUMAN	1	5	5	5	0.0513
Trifunctional enzyme subunit alpha, mitochondrial	ECHA_HUMAN	1	30	41	94	0.609
Microtubule-associated protein 4	MAP4_HUMAN	1	2	2	5	0.033
28S ribosomal protein S27, mitochondrial	RT27_HUMAN	1	6	8	10	0.271
Guanine nucleotide-binding protein G(k) subunit alpha	GNAI3_HUMAN	1	5	6	24	0.438
ER membrane protein complex subunit 2	EMC2_HUMAN	1	2	2	2	0.104
Epoxide hydrolase 1	HYEP_HUMAN	1	1	1	3	0.044
28S ribosomal protein S26, mitochondrial	RT26_HUMAN	1	2	3	11	0.141
Creatine kinase S-type, mitochondrial	KCRS_HUMAN	1	5	6	10	0.303
ER membrane protein complex subunit 1	EMC1_HUMAN	1	5	5	6	0.0775
X-ray repair cross-complementing protein 6	XRCC6_HUMAN	1	14	17	38	0.305
2',3'-cyclic-nucleotide 3'-phosphodiesterase	CN37_HUMAN	1	5	6	10	0.197
Epididymal secretory protein E1	NPC2_HUMAN	1	5	8	29	0.457
Multidrug resistance-associated protein 1	MRP1_HUMAN	1	2	2	2	0.0294
3-hydroxyacyl-CoA dehydrogenase type-2	HCD2_HUMAN	1	11	16	37	0.747
60S ribosomal protein L18a	RL18A_HUMAN	1	3	4	7	0.142
Cofilin-1	COF1_HUMAN	1	4	5	10	0.422
T-complex protein 1 subunit delta	TCPD_HUMAN	1	2	2	3	0.039
Gamma-glutamyl hydrolase	GGH_HUMAN	1	4	7	16	0.208
High affinity cationic amino acid transporter 1	CTR1_HUMAN	1	5	5	7	0.119
Sodium/myo-inositol cotransporter	SC5A3_HUMAN	1	10	11	35	0.217
UDP-glucose:glycoprotein glucosyltransferase 1	UGGG1_HUMAN	1	7	10	20	0.0695
Estradiol 17-beta-dehydrogenase 12	DHB12_HUMAN	1	4	5	18	0.215
14-3-3 protein theta	1433T_HUMAN	1	3	3	8	0.249
Protein scribble homolog	SCRIB_HUMAN	1	2	2	6	0.038
Malonyl-CoA-acyl carrier protein transacylase, mitochondrial	FABD_HUMAN	1	2	2	2	0.0949
Proactivator polypeptide	SAP_HUMAN	1	5	6	31	0.124
ATP synthase subunit g, mitochondrial	ATP5L_HUMAN	1	2	2	3	0.233
Delta-1-pyrroline-5-carboxylate synthase	P5CS_HUMAN	1	13	15	41	0.216
Vesicle-associated membrane protein-associated protein B/C	VAPB_HUMAN	1	2	2	7	0.115
Arginase-2, mitochondrial	ARGI2_HUMAN	1	7	10	23	0.37
Tyrosine-protein kinase Yes	YES_HUMAN	1	2	2	7	0.125
Keratin, type II cytoskeletal 5	K2C5_HUMAN	1	9	9	21	0.254
Signal peptidase complex catalytic subunit SEC11A	SC11A_HUMAN	1	3	3	5	0.112
39S ribosomal protein L12, mitochondrial	RM12_HUMAN	1	7	10	21	0.48
Transmembrane 9 superfamily member 3	TM9S3_HUMAN	1	2	2	4	0.0628
Thymidylate kinase	KTHY_HUMAN	1	4	4	5	0.255
Inactive tyrosine-protein kinase 7	PTK7_HUMAN	1	2	3	3	0.0318
T-complex protein 1 subunit eta	TCPH_HUMAN	1	3	5	7	0.0976
Mitochondrial import inner membrane translocase subunit Tim13	TIM13_HUMAN	1	2	2	3	0.305
Tricarboxylate transport protein, mitochondrial	TXTP_HUMAN	1	3	4	6	0.186
Serine/arginine-rich splicing factor 3	SRSF3_HUMAN	1	3	3	5	0.28
Nodal modulator 2	NOMO2_HUMAN	1	1	1	24	0.182
14-3-3 protein epsilon	1433E_HUMAN	1	4	4	7	0.302
X-ray repair cross-complementing protein 5	XRCC5_HUMAN	1	17	23	49	0.328
Catalase	CATA_HUMAN	1	3	3	3	0.0645
Retinol dehydrogenase 11	RDH11_HUMAN	1	4	4	4	0.17
28S ribosomal protein S18b, mitochondrial	RT18B_HUMAN	1	2	2	3	0.132
Lysosomal protective protein	PPGB_HUMAN	1	4	6	8	0.1
Endoplasmic reticulum resident protein 29	ERP29_HUMAN	1	6	6	10	0.33
Actin, cytoplasmic 1	ACTB_HUMAN	1	7	11	143	0.675
CD59 glycoprotein	CD59_HUMAN	1	2	4	9	0.188
40S ribosomal protein S6	RS6_HUMAN	1	6	7	12	0.301
60S ribosomal protein L17	RL17_HUMAN	1	6	9	15	0.326
Thiosulfate sulfurtransferase	THTR_HUMAN	1	2	2	3	0.121
Apoptosis-inducing factor 1, mitochondrial	AIFM1_HUMAN	1	7	8	13	0.176
Dihydrolipoyllysine-residue acetyltransferase component of pyruvate dehydrogenase complex, mitochondrial	ODP2_HUMAN	1	12	15	36	0.289
Mitochondrial import receptor subunit TOM40 homolog	TOM40_HUMAN	1	3	3	6	0.119
AP-2 complex subunit alpha-2	AP2A2_HUMAN	1	2	2	5	0.0596
Eukaryotic translation initiation factor 2 subunit 1	IF2A_HUMAN	1	2	2	2	0.0635
Heterogeneous nuclear ribonucleoprotein K	HNRPK_HUMAN	1	12	14	22	0.305
AP-2 complex subunit mu	AP2M1_HUMAN	1	1	1	2	0.069
Filamin-B	FLNB_HUMAN	1	16	17	26	0.0953
Cytoskeleton-associated protein 4	CKAP4_HUMAN	1	4	5	6	0.0897
FAST kinase domain-containing protein 5	FAKD5_HUMAN	1	5	6	7	0.109
40S ribosomal protein S10	RS10_HUMAN	1	6	7	21	0.382
Mitochondrial dicarboxylate carrier	DIC_HUMAN	1	4	4	4	0.206
28S ribosomal protein S29, mitochondrial	RT29_HUMAN	1	7	7	7	0.229
60S ribosomal protein L23a	RL23A_HUMAN	1	6	6	12	0.346
60S ribosomal protein L7a	RL7A_HUMAN	1	10	15	41	0.425
ATP-binding cassette sub-family D member 3	ABCD3_HUMAN	1	4	4	8	0.103
Complement component 1 Q subcomponent-binding protein, mitochondrial	C1QBP_HUMAN	1	9	14	48	0.606
28S ribosomal protein S28, mitochondrial	RT28_HUMAN	1	3	3	5	0.23
Creatine kinase U-type, mitochondrial	KCRU_HUMAN	1	2	2	5	0.228
Coronin-1C	COR1C_HUMAN	1	6	6	9	0.19
Staphylococcal nuclease domain-containing protein 1	SND1_HUMAN	1	20	25	47	0.356
Septin-9	SEPT9_HUMAN	1	10	10	13	0.229
Pyruvate kinase isozymes M1/M2	KPYM_HUMAN	1	9	10	11	0.273
Mitochondrial inner membrane protein	IMMT_HUMAN	1	16	20	28	0.313
Probable ATP-dependent RNA helicase DDX17	DDX17_HUMAN	1	3	3	8	0.0947
Stomatin-like protein 2, mitochondrial	STML2_HUMAN	1	12	19	59	0.61
Coxsackievirus and adenovirus receptor	CXAR_HUMAN	1	2	2	2	0.0548
Transducin beta-like protein 2	TBL2_HUMAN	1	5	5	5	0.154
Guanine nucleotide-binding protein G(I)/G(S)/G(T) subunit beta-1	GBB1_HUMAN	1	3	5	30	0.312
Importin-5	IPO5_HUMAN	1	2	2	2	0.0365
60S ribosomal protein L35a	RL35A_HUMAN	1	2	2	3	0.155
28S ribosomal protein S6, mitochondrial	RT06_HUMAN	1	5	5	11	0.528
Programmed cell death protein 6	PDCD6_HUMAN	1	3	3	3	0.178
28S ribosomal protein S5, mitochondrial	RT05_HUMAN	1	3	4	4	0.1
5'-nucleotidase	5NTD_HUMAN	1	2	2	3	0.0662
Voltage-dependent anion-selective channel protein 1	VDAC1_HUMAN	1	15	20	63	0.767
Serum paraoxonase/arylesterase 2	PON2_HUMAN	1	2	2	2	0.147
Mitochondrial import receptor subunit TOM5 homolog	TOM5_HUMAN	1	1	1	2	0.196
DNA-dependent protein kinase catalytic subunit	PRKDC_HUMAN	1	6	7	9	0.023
Bifunctional methylenetetrahydrofolate dehydrogenase/cyclohydrolase, mitochondrial	MTDC_HUMAN	1	3	4	7	0.211
Lon protease homolog, mitochondrial	LONM_HUMAN	1	17	21	42	0.303
39S ribosomal protein L14, mitochondrial	RM14_HUMAN	1	2	2	2	0.131
LIM and SH3 domain protein 1	LASP1_HUMAN	1	4	4	4	0.215
39S ribosomal protein L13, mitochondrial	RM13_HUMAN	1	3	3	3	0.18
Serine hydroxymethyltransferase, mitochondrial	GLYM_HUMAN	1	19	30	76	0.562
Transmembrane 9 superfamily member 4	TM9S4_HUMAN	1	2	2	4	0.0514
Unconventional myosin-Ib	MYO1B_HUMAN	1	2	2	2	0.0379
Splicing factor 1	SF01_HUMAN	1	2	2	2	0.0579
Peptidyl-prolyl cis-trans isomerase F, mitochondrial	PPIF_HUMAN	1	2	3	3	0.184
40S ribosomal protein S2	RS2_HUMAN	1	8	10	26	0.321
Transmembrane emp24 domain-containing protein 7	TMED7_HUMAN	1	3	3	3	0.196
Beta-galactosidase-1-like protein 2	GLBL2_HUMAN	1	1	1	1	0.0252
14-3-3 protein gamma	1433G_HUMAN	1	3	4	7	0.239
Eukaryotic translation initiation factor 2A	EIF2A_HUMAN	1	2	2	2	0.0496
Sodium/potassium-transporting ATPase subunit alpha-1	AT1A1_HUMAN	1	16	22	115	0.346
Monocarboxylate transporter 1	MOT1_HUMAN	1	5	6	20	0.142
Pyruvate carboxylase, mitochondrial	PYC_HUMAN	1	3	3	3	0.0382
Lamin-B1	LMNB1_HUMAN	1	2	2	2	0.0614
C-1-tetrahydrofolate synthase, cytoplasmic	C1TC_HUMAN	1	8	8	10	0.139
Histone H4	H4_HUMAN	1	6	8	14	0.427
Membrane-associated progesterone receptor component 1	PGRC1_HUMAN	1	5	5	6	0.328
Adenylate kinase 2, mitochondrial	KAD2_HUMAN	1	13	18	49	0.644
Dipeptidyl peptidase 1	CATC_HUMAN	1	6	6	10	0.229
Splicing factor, proline- and glutamine-rich	SFPQ_HUMAN	1	6	6	8	0.137
Cathepsin B	CATB_HUMAN	1	8	9	25	0.274
Histone H2B type 1-C/E/F/G/I	H2B1C_HUMAN	1	2	3	22	0.357
Aldehyde dehydrogenase, mitochondrial	ALDH2_HUMAN	1	3	4	4	0.0986
NADH dehydrogenase [ubiquinone] 1 alpha subcomplex subunit 4	NDUA4_HUMAN	1	4	5	6	0.679
Very long-chain specific acyl-CoA dehydrogenase, mitochondrial	ACADV_HUMAN	1	22	25	57	0.472
Mitochondrial import inner membrane translocase subunit Tim9	TIM9_HUMAN	1	2	2	3	0.292
Basigin	BASI_HUMAN	1	8	13	50	0.301
Protein canopy homolog 2	CNPY2_HUMAN	1	2	2	2	0.176
UPF0556 protein C19orf10	CS010_HUMAN	1	2	2	2	0.139
Prostaglandin F2 receptor negative regulator	FPRP_HUMAN	1	2	2	2	0.0262
60S ribosomal protein L19	RL19_HUMAN	1	2	3	6	0.133
Protein disulfide-isomerase	PDIA1_HUMAN	1	21	26	50	0.533
Cell surface glycoprotein MUC18	MUC18_HUMAN	1	6	7	9	0.141
Dedicator of cytokinesis protein 9	DOCK9_HUMAN	1	2	3	9	0.0145
Regulator of microtubule dynamics protein 3	RMD3_HUMAN	1	2	2	2	0.083
60S ribosomal protein L18	RL18_HUMAN	1	5	6	13	0.309
Protein S100-A16	S10AG_HUMAN	1	2	2	2	0.301
Ras-related protein Rab-8A	RAB8A_HUMAN	1	2	3	11	0.213
Heterogeneous nuclear ribonucleoprotein M	HNRPM_HUMAN	1	12	12	16	0.256
Alanine--tRNA ligase, mitochondrial	SYAM_HUMAN	1	3	4	4	0.0761
Guanine nucleotide-binding protein subunit alpha-13	GNA13_HUMAN	1	3	3	3	0.154
Glypican-1	GPC1_HUMAN	1	2	2	2	0.0573
40S ribosomal protein S12	RS12_HUMAN	1	5	7	13	0.402
Eukaryotic peptide chain release factor subunit 1	ERF1_HUMAN	1	2	2	2	0.0915
Probable ATP-dependent RNA helicase DHX36	DHX36_HUMAN	0.999	1	1	1	0.0129
Mitochondrial ornithine transporter 1	ORNT1_HUMAN	0.999	1	2	3	0.093
Carnitine O-palmitoyltransferase 2, mitochondrial	CPT2_HUMAN	0.999	1	1	1	0.0258
Ras-related protein Rab-1A	RAB1A_HUMAN	0.999	1	2	10	0.361
Transmembrane emp24 domain-containing protein 9	TMED9_HUMAN	0.999	1	1	1	0.0426
GTPase HRas	RASH_HUMAN	0.999	1	1	5	0.413
39S ribosomal protein L2, mitochondrial	RM02_HUMAN	0.999	1	1	1	0.0328
Plakophilin-3	PKP3_HUMAN	0.999	1	1	1	0.0326
ELAV-like protein 1	ELAV1_HUMAN	0.999	1	1	1	0.0399
39S ribosomal protein L43, mitochondrial	RM43_HUMAN	0.999	1	1	1	0.0512
Ras GTPase-activating-like protein IQGAP2	IQGA2_HUMAN	0.999	1	2	2	0.0184
Prenylcysteine oxidase 1	PCYOX_HUMAN	0.999	1	1	1	0.0297
ATPase family AAA domain-containing protein 3B	ATD3B_HUMAN	0.999	1	1	8	0.0849
Dystroglycan	DAG1_HUMAN	0.999	1	1	1	0.0145
Insulin-like growth factor 1 receptor	IGF1R_HUMAN	0.999	1	1	1	0.0154
Mycophenolic acid acyl-glucuronide esterase, mitochondrial	ABHDA_HUMAN	0.999	1	2	6	0.0523
Cytochrome b-c1 complex subunit 8	QCR8_HUMAN	0.999	1	1	1	0.159
Structural maintenance of chromosomes protein 4	SMC4_HUMAN	0.999	1	2	2	0.0116
Sorting nexin-3	SNX3_HUMAN	0.999	1	1	1	0.0556
40S ribosomal protein S27	RS27_HUMAN	0.999	1	2	4	0.286
Ras-related protein Rab-5A	RAB5A_HUMAN	0.999	1	1	5	0.214
Heterogeneous nuclear ribonucleoprotein F	HNRPF_HUMAN	0.999	1	1	13	0.104
Succinyl-CoA:3-ketoacid coenzyme A transferase 1, mitochondrial	SCOT1_HUMAN	0.999	1	1	1	0.0192
Macrophage migration inhibitory factor	MIF_HUMAN	0.999	1	1	1	0.0783
Histone H2A.V	H2AV_HUMAN	0.999	1	1	6	0.297
Actin, alpha cardiac muscle 1	ACTC_HUMAN	0.999	1	2	88	0.332
Putative 60S ribosomal protein L39-like 5	R39L5_HUMAN	0.999	1	1	1	0.196
Fatty aldehyde dehydrogenase	AL3A2_HUMAN	0.999	1	1	1	0.0247
Acylglycerol kinase, mitochondrial	AGK_HUMAN	0.999	1	1	1	0.0592
Neuroblastoma-amplified sequence	NBAS_HUMAN	0.999	1	1	2	0.00844
NADH dehydrogenase [ubiquinone] 1 beta subcomplex subunit 4	NDUB4_HUMAN	0.999	1	1	1	0.0775
MAGUK p55 subfamily member 5	MPP5_HUMAN	0.999	1	1	1	0.0178
1-phosphatidylinositol 4,5-bisphosphate phosphodiesterase beta-3	PLCB3_HUMAN	0.999	1	1	1	0.0154
Short/branched chain specific acyl-CoA dehydrogenase, mitochondrial	ACDSB_HUMAN	0.999	1	1	2	0.0486
Retinol dehydrogenase 14	RDH14_HUMAN	0.999	1	1	1	0.0417
Protein canopy homolog 3	CNPY3_HUMAN	0.999	1	1	1	0.0647
Histone H3.1	H31_HUMAN	0.998	1	2	14	0.235
Histone H3.3	H33_HUMAN	0.998	1	2	6	0.235
Histone H3.2	H32_HUMAN	0.998	1	2	7	0.235
CCR4-NOT transcription complex subunit 1	CNOT1_HUMAN	0.998	1	1	1	0.00421
LDLR chaperone MESD	MESD_HUMAN	0.998	1	1	1	0.158
Protein THEM6	THEM6_HUMAN	0.998	1	1	1	0.125
Eukaryotic initiation factor 4A-II	IF4A2_HUMAN	0.998	1	1	4	0.113
Alpha-aminoadipic semialdehyde synthase, mitochondrial	AASS_HUMAN	0.998	1	1	2	0.0194
Sulfhydryl oxidase 2	QSOX2_HUMAN	0.998	1	1	1	0.0229
14-3-3 protein beta/alpha	1433B_HUMAN	0.998	1	2	6	0.15
Ras-related protein Rab-5B	RAB5B_HUMAN	0.998	1	1	5	0.214
Radixin	RADI_HUMAN	0.998	1	1	15	0.13
Pyrroline-5-carboxylate reductase 2	P5CR2_HUMAN	0.998	1	1	9	0.128
AP-2 complex subunit alpha-1	AP2A1_HUMAN	0.998	1	1	3	0.0338
Myosin-10	MYH10_HUMAN	0.998	1	1	8	0.0405
Malectin	MLEC_HUMAN	0.998	1	1	1	0.0548
28S ribosomal protein S30, mitochondrial	RT30_HUMAN	0.998	1	1	2	0.0433
Probable histidine--tRNA ligase, mitochondrial	SYHM_HUMAN	0.998	1	1	2	0.0514
DnaJ homolog subfamily C member 11	DJC11_HUMAN	0.997	1	1	1	0.0322
HLA class I histocompatibility antigen, A-24 alpha chain	1A24_HUMAN	0.995	0	0	9	0.205
Anoctamin-1	ANO1_HUMAN	0.995	1	1	1	0.00811
Nesprin-1	SYNE1_HUMAN	0.992	1	1	1	0.00114
116 kDa U5 small nuclear ribonucleoprotein component	U5S1_HUMAN	0.992	1	1	1	0.0216
Ras-related protein Rap-1A	RAP1A_HUMAN	0.992	0	0	17	0.408
TATA-binding protein-associated factor 2N	RBP56_HUMAN	0.992	1	1	5	0.0524
Dynamin-2	DYN2_HUMAN	0.992	1	1	1	0.0115
Syntaxin-binding protein 1	STXB1_HUMAN	0.99	1	1	1	0.0337
Coiled-coil domain-containing protein 51	CCD51_HUMAN	0.989	1	1	1	0.0389
Vinculin	VINC_HUMAN	0.989	1	1	1	0.0185
CDK5 regulatory subunit-associated protein 3	CK5P3_HUMAN	0.989	1	1	1	0.0277
Neuropathy target esterase	PLPL6_HUMAN	0.989	1	1	2	0.019
Cyclin-dependent kinase 1	CDK1_HUMAN	0.989	1	1	2	0.0943
Protein LAP2	LAP2_HUMAN	0.989	1	1	1	0.0156
Sepiapterin reductase	SPRE_HUMAN	0.988	1	1	2	0.0728
Nucleolar protein 58	NOP58_HUMAN	0.988	1	1	1	0.034
Glycine--tRNA ligase	SYG_HUMAN	0.985	1	1	2	0.0176
Brain-specific angiogenesis inhibitor 1-associated protein 2-like protein 1	BI2L1_HUMAN	0.984	1	1	1	0.0509
Procollagen-lysine,2-oxoglutarate 5-dioxygenase 1	PLOD1_HUMAN	0.983	1	1	2	0.0206
Heterogeneous nuclear ribonucleoprotein U-like protein 1	HNRL1_HUMAN	0.981	1	1	1	0.0257
Mitochondrial import receptor subunit TOM20 homolog	TOM20_HUMAN	0.979	1	1	3	0.255
Alpha-actinin-1	ACTN1_HUMAN	0.976	0	0	37	0.148
Heat shock 70 kDa protein 6	HSP76_HUMAN	0.975	1	2	6	0.0373
Transmembrane and coiled-coil domain-containing protein 1	TMCO1_HUMAN	0.967	1	1	1	0.0798
Amyloid beta A4 protein	A4_HUMAN	0.967	1	1	1	0.0169
Acyl-coenzyme A thioesterase 8	ACOT8_HUMAN	0.967	1	1	2	0.0596
Beta-2-syntrophin	SNTB2_HUMAN	0.967	1	1	1	0.0167
Transcription factor BTF3	BTF3_HUMAN	0.967	1	1	2	0.107
Galectin-8	LEG8_HUMAN	0.967	1	1	1	0.0315
Cold-inducible RNA-binding protein	CIRBP_HUMAN	0.967	1	1	1	0.122
cAMP-dependent protein kinase type II-alpha regulatory subunit	KAP2_HUMAN	0.967	1	1	1	0.0396
UBX domain-containing protein 4	UBXN4_HUMAN	0.967	1	1	2	0.0276
Cell differentiation protein RCD1 homolog	RCD1_HUMAN	0.967	1	1	1	0.0368
DnaJ homolog subfamily A member 1	DNJA1_HUMAN	0.967	1	1	1	0.0327
Nucleolysin TIAR	TIAR_HUMAN	0.967	1	1	1	0.048
Microsomal glutathione S-transferase 2	MGST2_HUMAN	0.967	1	1	1	0.0952
45 kDa calcium-binding protein	CAB45_HUMAN	0.967	1	1	1	0.0773
DDRGK domain-containing protein 1	DDRGK_HUMAN	0.967	1	2	3	0.0541
Glutamine--tRNA ligase	SYQ_HUMAN	0.967	1	1	1	0.0297
Secretory carrier-associated membrane protein 2	SCAM2_HUMAN	0.967	1	1	1	0.0365
Podocalyxin	PODXL_HUMAN	0.967	1	1	1	0.0233
Tumor necrosis factor receptor superfamily member 16	TNR16_HUMAN	0.967	1	2	2	0.0515
Tyrosine-protein kinase JAK1	JAK1_HUMAN	0.967	1	1	1	0.013
Amyloid-like protein 2	APLP2_HUMAN	0.967	1	1	1	0.0262
Transmembrane protein 214	TM214_HUMAN	0.967	1	1	1	0.0305
Sodium-coupled neutral amino acid transporter 1	S38A1_HUMAN	0.967	1	1	2	0.0575
Dihydroxyacetone phosphate acyltransferase	GNPAT_HUMAN	0.967	1	1	1	0.0191
PRA1 family protein 3	PRAF3_HUMAN	0.967	1	1	2	0.101
Protein disulfide-isomerase A5	PDIA5_HUMAN	0.967	1	1	1	0.0385
Intercellular adhesion molecule 2	ICAM2_HUMAN	0.967	1	2	4	0.0582
Thioredoxin-related transmembrane protein 2	TMX2_HUMAN	0.967	1	1	1	0.0338
Serine/threonine-protein kinase PAK 4	PAK4_HUMAN	0.967	1	1	1	0.0305
Keratin, type I cytoskeletal 10	K1C10_HUMAN	0.967	1	1	1	0.0462
28S ribosomal protein S35, mitochondrial	RT35_HUMAN	0.967	1	1	3	0.031
Phosphatidylinositol-binding clathrin assembly protein	PICAL_HUMAN	0.967	1	1	1	0.0552
Guanine nucleotide-binding protein G(I)/G(S)/G(O) subunit gamma-12	GBG12_HUMAN	0.967	1	1	2	0.222
Translin-associated protein X	TSNAX_HUMAN	0.967	1	1	1	0.0655
Dolichyl-diphosphooligosaccharide--protein glycosyltransferase subunit DAD1	DAD1_HUMAN	0.967	1	1	2	0.0885
Tumor necrosis factor receptor superfamily member 10A	TR10A_HUMAN	0.967	1	1	1	0.0342
Tripeptidyl-peptidase 1	TPP1_HUMAN	0.967	1	2	2	0.048
Guanine nucleotide-binding protein G(I)/G(S)/G(O) subunit gamma-4	GBG4_HUMAN	0.967	1	1	1	0.227
Nicastrin	NICA_HUMAN	0.967	1	1	1	0.0409
Cleavage and polyadenylation specificity factor subunit 6	CPSF6_HUMAN	0.967	1	2	6	0.0454
Trophoblast glycoprotein	TPBG_HUMAN	0.967	1	1	1	0.0333
Protein-glutamine gamma-glutamyltransferase 2	TGM2_HUMAN	0.967	1	1	1	0.0189
Dolichyl-phosphate beta-glucosyltransferase	ALG5_HUMAN	0.967	1	1	1	0.037
Importin subunit alpha-2	IMA2_HUMAN	0.967	1	1	1	0.0473
Tumor necrosis factor receptor superfamily member 10B	TR10B_HUMAN	0.967	1	1	1	0.0386
Nucleobindin-2	NUCB2_HUMAN	0.967	1	1	2	0.0214
Pre-mRNA-processing factor 19	PRP19_HUMAN	0.967	1	1	1	0.0337
Retinoid-inducible serine carboxypeptidase	RISC_HUMAN	0.967	1	1	1	0.0243
Translocation protein SEC62	SEC62_HUMAN	0.967	1	1	1	0.0226
Polypeptide N-acetylgalactosaminyltransferase 6	GALT6_HUMAN	0.967	1	1	1	0.0514
26S proteasome non-ATPase regulatory subunit 2	PSMD2_HUMAN	0.967	1	1	1	0.0242
Zinc finger CCCH domain-containing protein 15	ZC3HF_HUMAN	0.967	1	1	2	0.0235
Cytochrome b-c1 complex subunit 6, mitochondrial	QCR6_HUMAN	0.967	1	2	8	0.198
Prolactin regulatory element-binding protein	PREB_HUMAN	0.967	1	1	1	0.0647
Ras-related protein Rab-14	RAB14_HUMAN	0.967	1	1	1	0.102
Peptidyl-prolyl cis-trans isomerase FKBP2	FKBP2_HUMAN	0.967	1	1	1	0.0915
Annexin A3	ANXA3_HUMAN	0.967	1	1	1	0.0588
DnaJ homolog subfamily C member 10	DJC10_HUMAN	0.967	1	1	1	0.0126
Signal recognition particle 14 kDa protein	SRP14_HUMAN	0.967	1	2	2	0.103
Ubiquitin-associated protein 2	UBAP2_HUMAN	0.967	1	1	1	0.00983
Thioredoxin domain-containing protein 12	TXD12_HUMAN	0.967	1	1	1	0.0872
Golgi SNAP receptor complex member 1	GOSR1_HUMAN	0.967	1	1	1	0.06
Eukaryotic translation initiation factor 3 subunit C	EIF3C_HUMAN	0.967	1	1	1	0.0208
Small nuclear ribonucleoprotein Sm D1	SMD1_HUMAN	0.967	1	1	2	0.168
Protein dpy-30 homolog	DPY30_HUMAN	0.967	1	1	1	0.202
Eukaryotic translation initiation factor 4H	IF4H_HUMAN	0.967	1	1	1	0.117
FERM, RhoGEF and pleckstrin domain-containing protein 1	FARP1_HUMAN	0.967	1	1	1	0.0144
CDGSH iron-sulfur domain-containing protein 2	CISD2_HUMAN	0.967	1	1	1	0.104
Nicalin	NCLN_HUMAN	0.967	1	1	1	0.0195
U2 small nuclear ribonucleoprotein B''	RU2B_HUMAN	0.967	1	1	1	0.0844
2-hydroxyacyl-CoA lyase 1	HACL1_HUMAN	0.967	1	1	1	0.0242
Epidermal growth factor receptor	EGFR_HUMAN	0.967	1	1	2	0.0149
Stromal interaction molecule 1	STIM1_HUMAN	0.967	1	1	1	0.0175
Serine/arginine repetitive matrix protein 1	SRRM1_HUMAN	0.967	1	1	1	0.0133
T-complex protein 1 subunit beta	TCPB_HUMAN	0.967	1	1	1	0.028
Vesicle-trafficking protein SEC22b	SC22B_HUMAN	0.967	1	1	1	0.0558
Dehydrogenase/reductase SDR family member 7B	DRS7B_HUMAN	0.967	1	2	3	0.0492
Dehydrogenase/reductase SDR family member 7	DHRS7_HUMAN	0.967	1	1	1	0.0678
V-type proton ATPase subunit F	VATF_HUMAN	0.967	1	1	1	0.202
Eukaryotic translation initiation factor 2 subunit 3	IF2G_HUMAN	0.967	1	1	1	0.053
Proteasome subunit beta type-1	PSB1_HUMAN	0.967	1	1	1	0.0747
Cysteine and glycine-rich protein 1	CSRP1_HUMAN	0.967	1	1	2	0.0777
2-hydroxyacylsphingosine 1-beta-galactosyltransferase	CGT_HUMAN	0.967	1	1	2	0.0277
Intercellular adhesion molecule 1	ICAM1_HUMAN	0.967	1	1	1	0.0263
Prolyl 4-hydroxylase subunit alpha-1	P4HA1_HUMAN	0.967	1	1	1	0.0262
Ancient ubiquitous protein 1	AUP1_HUMAN	0.967	1	1	1	0.0525
Septin-10	SEP10_HUMAN	0.967	1	1	1	0.0242
Prolyl 3-hydroxylase 3	P3H3_HUMAN	0.967	1	1	1	0.0272
B-cell receptor-associated protein 31	BAP31_HUMAN	0.967	1	1	1	0.0366
Nuclear pore complex protein Nup155	NU155_HUMAN	0.967	1	1	1	0.0158
Myb-binding protein 1A	MBB1A_HUMAN	0.967	1	2	3	0.0143
Programmed cell death 6-interacting protein	PDC6I_HUMAN	0.967	1	1	1	0.0196
Protein FAM3C	FAM3C_HUMAN	0.967	1	1	1	0.0529
Phenylalanine--tRNA ligase beta subunit	SYFB_HUMAN	0.967	1	1	1	0.0221
Golgi membrane protein 1	GOLM1_HUMAN	0.967	1	1	1	0.0224
Sortilin	SORT_HUMAN	0.967	1	1	2	0.012
Prolyl 4-hydroxylase subunit alpha-2	P4HA2_HUMAN	0.967	1	1	1	0.0355
40S ribosomal protein S30	RS30_HUMAN	0.967	1	1	3	0.169
Transmembrane protein 109	TM109_HUMAN	0.967	1	1	2	0.0494
Protein SET	SET_HUMAN	0.967	1	1	1	0.11
Granulins	GRN_HUMAN	0.967	1	1	1	0.0236
Tight junction protein ZO-2	ZO2_HUMAN	0.967	1	1	1	0.0143
Drebrin	DREB_HUMAN	0.967	1	1	1	0.0139
Transmembrane 9 superfamily member 2	TM9S2_HUMAN	0.967	1	1	2	0.0226
CD109 antigen	CD109_HUMAN	0.967	1	1	2	0.0118
Small nuclear ribonucleoprotein Sm D3	SMD3_HUMAN	0.967	1	1	2	0.0714
N-acetyltransferase 10	NAT10_HUMAN	0.967	1	1	2	0.0254
Syntaxin-7	STX7_HUMAN	0.967	1	1	1	0.0498
High mobility group protein B1	HMGB1_HUMAN	0.967	1	1	1	0.0744
Small nuclear ribonucleoprotein E	RUXE_HUMAN	0.967	1	1	1	0.12
ADP-ribosylation factor 1	ARF1_HUMAN	0.967	1	1	2	0.0994
Leucyl-cystinyl aminopeptidase	LCAP_HUMAN	0.967	1	1	1	0.0146
La-related protein 1	LARP1_HUMAN	0.967	1	1	1	0.0146
Estradiol 17-beta-dehydrogenase 11	DHB11_HUMAN	0.967	1	2	3	0.0533
Solute carrier organic anion transporter family member 4A1	SO4A1_HUMAN	0.967	1	1	1	0.0152
Protein lin-7 homolog C	LIN7C_HUMAN	0.967	1	1	2	0.0558
6-phosphogluconate dehydrogenase, decarboxylating	6PGD_HUMAN	0.967	1	1	1	0.0476
ATP-dependent RNA helicase DDX18	DDX18_HUMAN	0.967	1	1	2	0.0209
Eukaryotic translation initiation factor 3 subunit L	EIF3L_HUMAN	0.967	1	1	1	0.0301
Legumain	LGMN_HUMAN	0.967	1	1	1	0.0393
Coactosin-like protein	COTL1_HUMAN	0.967	1	1	1	0.113
Multifunctional protein ADE2	PUR6_HUMAN	0.967	1	2	2	0.0353
Mitochondrial import receptor subunit TOM34	TOM34_HUMAN	0.967	1	1	1	0.0485
Actin-related protein 2/3 complex subunit 2	ARPC2_HUMAN	0.967	1	1	1	0.0367
V-type proton ATPase subunit E 1	VATE1_HUMAN	0.967	1	1	2	0.0885
Calcium-transporting ATPase type 2C member 1	AT2C1_HUMAN	0.967	1	1	1	0.012
Protein tweety homolog 3	TTYH3_HUMAN	0.967	1	2	3	0.0268
Septin-11	SEP11_HUMAN	0.965	0	0	2	0.0653
Beta-2-microglobulin	B2MG_HUMAN	0.96	1	1	1	0.084
F-actin-capping protein subunit alpha-1	CAZA1_HUMAN	0.959	0	0	0	0
Abhydrolase domain-containing protein FAM108B1	F108B_HUMAN	0.958	1	1	1	0.0938
LIM domain only protein 7	LMO7_HUMAN	0.958	1	1	1	0.00891
Sodium- and chloride-dependent taurine transporter	SC6A6_HUMAN	0.957	1	1	1	0.0274
Extended synaptotagmin-2	ESYT2_HUMAN	0.957	0	0	0	0
CAD protein	PYR1_HUMAN	0.956	1	1	1	0.00494
Splicing factor 3A subunit 3	SF3A3_HUMAN	0.953	1	1	1	0.0439

## Sheet: Enriched Golgi
Protein name	Protein accession numbers	Protein identification probability	Exclusive unique peptide count	Exclusive unique spectrum count	Total spectrum count	Percentage sequence coverage
CD9 antigen=Homo sapiens GN=CD9 PE=1 SV=4	CD9_HUMAN	1	3	6	19	0.206
Uncharacterized family 31 glucosidase KIAA1161=Homo sapiens GN=KIAA1161 PE=1 SV=2	K1161_HUMAN	1	2	2	2	0.0644
Monoacylglycerol lipase ABHD6=Homo sapiens GN=ABHD6 PE=2 SV=1	ABHD6_HUMAN	1	3	3	3	0.154
Transmembrane and coiled-coil domain-containing protein 1=Homo sapiens GN=TMCO1 PE=1 SV=1	TMCO1_HUMAN	1	3	3	5	0.197
Acetyl-CoA acetyltransferase, mitochondrial=Homo sapiens GN=ACAT1 PE=1 SV=1	THIL_HUMAN	1	2	3	6	0.103
Procollagen-lysine,2-oxoglutarate 5-dioxygenase 3=Homo sapiens GN=PLOD3 PE=1 SV=1	PLOD3_HUMAN	1	4	5	5	0.0637
60S ribosomal protein L3=Homo sapiens GN=RPL3 PE=1 SV=2	RL3_HUMAN	1	2	2	3	0.0744
Multidrug resistance-associated protein 4=Homo sapiens GN=ABCC4 PE=1 SV=3	MRP4_HUMAN	1	7	9	15	0.0853
Cathepsin Z=Homo sapiens GN=CTSZ PE=1 SV=1	CATZ_HUMAN	1	6	7	20	0.29
SH3 domain-binding protein 4=Homo sapiens GN=SH3BP4 PE=1 SV=1	SH3B4_HUMAN	1	10	11	14	0.147
Neutral amino acid transporter B(0)=Homo sapiens GN=SLC1A5 PE=1 SV=2	AAAT_HUMAN	1	10	16	54	0.205
Legumain=Homo sapiens GN=LGMN PE=1 SV=1	LGMN_HUMAN	1	3	4	6	0.111
Integrin beta-1=Homo sapiens GN=ITGB1 PE=1 SV=2	ITB1_HUMAN	1	20	24	45	0.338
Guanine nucleotide-binding protein G(I)/G(S)/G(T) subunit beta-2=Homo sapiens GN=GNB2 PE=1 SV=3	GBB2_HUMAN	1	8	12	72	0.518
Elongation factor 2=Homo sapiens GN=EEF2 PE=1 SV=4	EF2_HUMAN	1	12	15	21	0.226
Beta-2-syntrophin=Homo sapiens GN=SNTB2 PE=1 SV=1	SNTB2_HUMAN	1	2	2	3	0.0407
Voltage-dependent anion-selective channel protein 2=Homo sapiens GN=VDAC2 PE=1 SV=2	VDAC2_HUMAN	1	8	8	10	0.354
Junction plakoglobin=Homo sapiens GN=JUP PE=1 SV=3	PLAK_HUMAN	1	2	2	3	0.0617
Keratin, type II cytoskeletal 8=Homo sapiens GN=KRT8 PE=1 SV=7	K2C8_HUMAN	1	4	4	7	0.106
HLA class I histocompatibility antigen, A-24 alpha chain=Homo sapiens GN=HLA-A PE=1 SV=2	1A24_HUMAN	1	3	3	24	0.408
Cytochrome c=Homo sapiens GN=CYCS PE=1 SV=2	CYC_HUMAN	1	2	3	4	0.181
Unconventional myosin-Id=Homo sapiens GN=MYO1D PE=1 SV=2	MYO1D_HUMAN	1	26	32	56	0.305
Transmembrane protein 33=Homo sapiens GN=TMEM33 PE=1 SV=2	TMM33_HUMAN	1	3	3	4	0.154
Ras-related protein Rab-1B=Homo sapiens GN=RAB1B PE=1 SV=1	RAB1B_HUMAN	1	2	2	17	0.443
Unconventional myosin-Ic=Homo sapiens GN=MYO1C PE=1 SV=4	MYO1C_HUMAN	1	33	39	85	0.433
Transmembrane emp24 domain-containing protein 9=Homo sapiens GN=TMED9 PE=1 SV=2	TMED9_HUMAN	1	3	3	7	0.2
40S ribosomal protein S3=Homo sapiens GN=RPS3 PE=1 SV=2	RS3_HUMAN	1	11	11	14	0.498
Tubulin alpha-1C chain=Homo sapiens GN=TUBA1C PE=1 SV=1	TBA1C_HUMAN	1	1	1	18	0.145
Mannosyl-oligosaccharide glucosidase=Homo sapiens GN=MOGS PE=1 SV=5	MOGS_HUMAN	1	11	11	18	0.277
Sodium/potassium-transporting ATPase subunit alpha-3=Homo sapiens GN=ATP1A3 PE=1 SV=3	AT1A3_HUMAN	1	1	1	94	0.202
Alpha-1-antitrypsin=Homo sapiens GN=SERPINA1 PE=1 SV=3	A1AT_HUMAN	1	2	2	2	0.0598
Plakophilin-2=Homo sapiens GN=PKP2 PE=1 SV=2	PKP2_HUMAN	1	13	13	15	0.176
Wolframin=Homo sapiens GN=WFS1 PE=1 SV=2	WFS1_HUMAN	1	6	6	6	0.0764
Galectin-8=Homo sapiens GN=LGALS8 PE=1 SV=4	LEG8_HUMAN	1	3	3	5	0.0915
Atlastin-3=Homo sapiens GN=ATL3 PE=1 SV=1	ATLA3_HUMAN	1	6	6	10	0.207
cAMP-dependent protein kinase type II-alpha regulatory subunit=Homo sapiens GN=PRKAR2A PE=1 SV=2	KAP2_HUMAN	1	2	2	2	0.0817
Atlastin-2=Homo sapiens GN=ATL2 PE=1 SV=2	ATLA2_HUMAN	1	4	4	7	0.101
Probable cation-transporting ATPase 13A3=Homo sapiens GN=ATP13A3 PE=1 SV=4	AT133_HUMAN	1	2	2	3	0.0237
Phostensin=Homo sapiens GN=PPP1R18 PE=1 SV=1	PPR18_HUMAN	1	2	2	2	0.0326
Protein disulfide-isomerase A3=Homo sapiens GN=PDIA3 PE=1 SV=4	PDIA3_HUMAN	1	20	26	70	0.457
Thioredoxin-related transmembrane protein 1=Homo sapiens GN=TMX1 PE=1 SV=1	TMX1_HUMAN	1	4	5	6	0.171
Serine palmitoyltransferase 1=Homo sapiens GN=SPTLC1 PE=1 SV=1	SPTC1_HUMAN	1	5	5	6	0.19
BPI fold-containing family B member 2=Homo sapiens GN=BPIFB2 PE=1 SV=2	BPIB2_HUMAN	1	1	2	3	0.0393
Phosphatidylinositide phosphatase SAC1=Homo sapiens GN=SACM1L PE=1 SV=2	SAC1_HUMAN	1	4	4	5	0.106
Acid ceramidase=Homo sapiens GN=ASAH1 PE=1 SV=5	ASAH1_HUMAN	1	4	5	7	0.195
Rab GDP dissociation inhibitor beta=Homo sapiens GN=GDI2 PE=1 SV=2	GDIB_HUMAN	1	3	3	3	0.0742
40S ribosomal protein S14=Homo sapiens GN=RPS14 PE=1 SV=3	RS14_HUMAN	1	3	3	4	0.172
40S ribosomal protein S13=Homo sapiens GN=RPS13 PE=1 SV=2	RS13_HUMAN	1	3	5	7	0.265
GTPase HRas=Homo sapiens GN=HRAS PE=1 SV=1	RASH_HUMAN	1	2	3	14	0.54
Guanine nucleotide-binding protein G(i) subunit alpha-1=Homo sapiens GN=GNAI1 PE=1 SV=2	GNAI1_HUMAN	1	3	5	60	0.41
Calmodulin=Homo sapiens GN=CALM1 PE=1 SV=2	CALM_HUMAN	1	5	8	28	0.705
60S ribosomal protein L22=Homo sapiens GN=RPL22 PE=1 SV=2	RL22_HUMAN	1	2	2	5	0.289
Epithelial cell adhesion molecule=Homo sapiens GN=EPCAM PE=1 SV=2	EPCAM_HUMAN	1	2	3	3	0.086
Actin-related protein 3=Homo sapiens GN=ACTR3 PE=1 SV=3	ARP3_HUMAN	1	2	3	6	0.0598
Alpha-actinin-1=Homo sapiens GN=ACTN1 PE=1 SV=2	ACTN1_HUMAN	1	6	6	64	0.268
Stimulated by retinoic acid gene 6 protein homolog=Homo sapiens GN=STRA6 PE=1 SV=1	STRA6_HUMAN	1	4	5	10	0.099
60S ribosomal protein L4=Homo sapiens GN=RPL4 PE=1 SV=5	RL4_HUMAN	1	6	7	11	0.176
Adenosine 3'-phospho 5'-phosphosulfate transporter 1=Homo sapiens GN=SLC35B2 PE=1 SV=1	S35B2_HUMAN	1	4	4	5	0.118
Calponin-2=Homo sapiens GN=CNN2 PE=1 SV=4	CNN2_HUMAN	1	13	17	25	0.595
Integrin alpha-V=Homo sapiens GN=ITGAV PE=1 SV=2	ITAV_HUMAN	1	12	14	18	0.179
45 kDa calcium-binding protein=Homo sapiens GN=SDF4 PE=1 SV=1	CAB45_HUMAN	1	2	3	7	0.105
Myosin regulatory light chain 12A=Homo sapiens GN=MYL12A PE=1 SV=2	ML12A_HUMAN	1	3	3	3	0.228
Mucin-5AC (Fragments)=Homo sapiens GN=MUC5AC PE=1 SV=3	MUC5A_HUMAN	1	4	4	5	0.0111
Ig alpha-1 chain C region=Homo sapiens GN=IGHA1 PE=1 SV=2	IGHA1_HUMAN	1	6	9	109	0.731
Deoxyribonuclease-2-alpha=Homo sapiens GN=DNASE2 PE=1 SV=2	DNS2A_HUMAN	1	4	4	6	0.183
Secretory carrier-associated membrane protein 2=Homo sapiens GN=SCAMP2 PE=1 SV=2	SCAM2_HUMAN	1	2	2	2	0.076
Podocalyxin=Homo sapiens GN=PODXL PE=1 SV=2	PODXL_HUMAN	1	4	4	5	0.12
Citrate synthase, mitochondrial=Homo sapiens GN=CS PE=1 SV=2	CISY_HUMAN	1	5	5	6	0.223
Phospholipase D3=Homo sapiens GN=PLD3 PE=1 SV=1	PLD3_HUMAN	1	10	11	14	0.261
Tumor necrosis factor receptor superfamily member 16=Homo sapiens GN=NGFR PE=1 SV=1	TNR16_HUMAN	1	2	3	7	0.0539
Cadherin-13=Homo sapiens GN=CDH13 PE=1 SV=1	CAD13_HUMAN	1	2	2	2	0.0491
Cytoplasmic dynein 1 heavy chain 1=Homo sapiens GN=DYNC1H1 PE=1 SV=5	DYHC1_HUMAN	1	2	2	2	0.00753
Ras GTPase-activating protein-binding protein 1=Homo sapiens GN=G3BP1 PE=1 SV=1	G3BP1_HUMAN	1	6	6	6	0.193
Tyrosine-protein kinase JAK1=Homo sapiens GN=JAK1 PE=1 SV=2	JAK1_HUMAN	1	2	3	7	0.0295
ATP synthase subunit alpha, mitochondrial=Homo sapiens GN=ATP5A1 PE=1 SV=1	ATPA_HUMAN	1	8	8	9	0.213
Ras GTPase-activating-like protein IQGAP1=Homo sapiens GN=IQGAP1 PE=1 SV=1	IQGA1_HUMAN	1	13	13	14	0.138
60S ribosomal protein L11=Homo sapiens GN=RPL11 PE=1 SV=2	RL11_HUMAN	1	2	2	3	0.23
Golgi SNAP receptor complex member 1=Homo sapiens GN=GOSR1 PE=1 SV=1	GOSR1_HUMAN	1	2	2	4	0.096
Amyloid-like protein 2=Homo sapiens GN=APLP2 PE=1 SV=2	APLP2_HUMAN	1	2	2	4	0.0419
40S ribosomal protein S16=Homo sapiens GN=RPS16 PE=1 SV=2	RS16_HUMAN	1	5	5	8	0.356
Sodium-coupled neutral amino acid transporter 1=Homo sapiens GN=SLC38A1 PE=1 SV=1	S38A1_HUMAN	1	2	2	3	0.0575
Monocarboxylate transporter 4=Homo sapiens GN=SLC16A3 PE=1 SV=1	MOT4_HUMAN	1	8	10	14	0.219
Protein S100-A4=Homo sapiens GN=S100A4 PE=1 SV=1	S10A4_HUMAN	1	2	2	2	0.188
Sorbin and SH3 domain-containing protein 1=Homo sapiens GN=SORBS1 PE=1 SV=3	SRBS1_HUMAN	1	2	2	2	0.0155
Actin-related protein 2/3 complex subunit 4=Homo sapiens GN=ARPC4 PE=1 SV=3	ARPC4_HUMAN	1	3	3	4	0.161
Sodium- and chloride-dependent taurine transporter=Homo sapiens GN=SLC6A6 PE=1 SV=2	SC6A6_HUMAN	1	2	2	2	0.0419
40S ribosomal protein SA=Homo sapiens GN=RPSA PE=1 SV=4	RSSA_HUMAN	1	9	11	19	0.444
Phosphatidylinositol 4-kinase alpha=Homo sapiens GN=PI4KA PE=1 SV=3	PI4KA_HUMAN	1	2	2	3	0.0161
Dedicator of cytokinesis protein 9=Homo sapiens GN=DOCK9 PE=1 SV=2	DOCK9_HUMAN	1	9	10	11	0.0706
Peptidyl-prolyl cis-trans isomerase FKBP11=Homo sapiens GN=FKBP11 PE=1 SV=1	FKB11_HUMAN	1	3	4	8	0.358
HLA class I histocompatibility antigen, A-2 alpha chain=Homo sapiens GN=HLA-A PE=1 SV=1	1A02_HUMAN	1	4	4	18	0.359
Long-chain-fatty-acid--CoA ligase 4=Homo sapiens GN=ACSL4 PE=1 SV=2	ACSL4_HUMAN	1	7	7	23	0.232
Moesin=Homo sapiens GN=MSN PE=1 SV=3	MOES_HUMAN	1	10	12	39	0.312
Long-chain-fatty-acid--CoA ligase 3=Homo sapiens GN=ACSL3 PE=1 SV=3	ACSL3_HUMAN	1	2	2	13	0.0764
Protein disulfide-isomerase A4=Homo sapiens GN=PDIA4 PE=1 SV=2	PDIA4_HUMAN	1	10	10	10	0.228
Thioredoxin-related transmembrane protein 2=Homo sapiens GN=TMX2 PE=1 SV=1	TMX2_HUMAN	1	2	2	2	0.0777
Heterogeneous nuclear ribonucleoprotein Q=Homo sapiens GN=SYNCRIP PE=1 SV=2	HNRPQ_HUMAN	1	1	1	5	0.053
Protein transport protein Sec61 subunit beta=Homo sapiens GN=SEC61B PE=1 SV=2	SC61B_HUMAN	1	2	3	7	0.271
Prolyl 4-hydroxylase subunit alpha-2=Homo sapiens GN=P4HA2 PE=1 SV=1	P4HA2_HUMAN	1	2	2	3	0.0729
Glypican-4=Homo sapiens GN=GPC4 PE=1 SV=4	GPC4_HUMAN	1	7	7	7	0.187
Signal recognition particle receptor subunit beta=Homo sapiens GN=SRPRB PE=1 SV=3	SRPRB_HUMAN	1	9	9	11	0.45
Clathrin heavy chain 1=Homo sapiens GN=CLTC PE=1 SV=5	CLH1_HUMAN	1	11	12	19	0.119
Keratin, type I cytoskeletal 10=Homo sapiens GN=KRT10 PE=1 SV=6	K1C10_HUMAN	1	15	19	48	0.433
Guanine nucleotide-binding protein G(i) subunit alpha-2=Homo sapiens GN=GNAI2 PE=1 SV=3	GNAI2_HUMAN	1	11	14	73	0.673
ADP/ATP translocase 3=Homo sapiens GN=SLC25A6 PE=1 SV=4	ADT3_HUMAN	1	1	1	10	0.302
60S ribosomal protein L23=Homo sapiens GN=RPL23 PE=1 SV=1	RL23_HUMAN	1	4	5	6	0.379
ADP/ATP translocase 2=Homo sapiens GN=SLC25A5 PE=1 SV=7	ADT2_HUMAN	1	2	2	9	0.295
Sarcoplasmic/endoplasmic reticulum calcium ATPase 2=Homo sapiens GN=ATP2A2 PE=1 SV=1	AT2A2_HUMAN	1	15	17	22	0.202
60S ribosomal protein L6=Homo sapiens GN=RPL6 PE=1 SV=3	RL6_HUMAN	1	5	6	15	0.191
Glucosidase 2 subunit beta=Homo sapiens GN=PRKCSH PE=1 SV=2	GLU2B_HUMAN	1	5	5	8	0.106
Lysosomal Pro-X carboxypeptidase=Homo sapiens GN=PRCP PE=1 SV=1	PCP_HUMAN	1	4	5	7	0.129
Integrin beta-5=Homo sapiens GN=ITGB5 PE=1 SV=1	ITB5_HUMAN	1	9	11	32	0.19
60S ribosomal protein L5=Homo sapiens GN=RPL5 PE=1 SV=3	RL5_HUMAN	1	5	7	11	0.239
Mitochondrial import receptor subunit TOM22 homolog=Homo sapiens GN=TOMM22 PE=1 SV=3	TOM22_HUMAN	1	2	2	2	0.162
Ras-related protein Rab-6A=Homo sapiens GN=RAB6A PE=1 SV=3	RAB6A_HUMAN	1	2	2	17	0.327
Integrin beta-4=Homo sapiens GN=ITGB4 PE=1 SV=5	ITB4_HUMAN	1	19	21	31	0.164
Gamma-interferon-inducible lysosomal thiol reductase=Homo sapiens GN=IFI30 PE=1 SV=3	GILT_HUMAN	1	2	2	3	0.256
Plasminogen activator inhibitor 1=Homo sapiens GN=SERPINE1 PE=1 SV=1	PAI1_HUMAN	1	13	14	21	0.505
Sec1 family domain-containing protein 1=Homo sapiens GN=SCFD1 PE=1 SV=4	SCFD1_HUMAN	1	3	3	3	0.0732
Very-long-chain enoyl-CoA reductase=Homo sapiens GN=TECR PE=1 SV=1	TECR_HUMAN	1	4	4	8	0.133
Na(+)/H(+) exchange regulatory cofactor NHE-RF1=Homo sapiens GN=SLC9A3R1 PE=1 SV=4	NHRF1_HUMAN	1	4	4	6	0.128
Mucin-5B=Homo sapiens GN=MUC5B PE=1 SV=3	MUC5B_HUMAN	1	27	33	51	0.0745
Ig alpha-2 chain C region=Homo sapiens GN=IGHA2 PE=1 SV=3	IGHA2_HUMAN	1	2	2	85	0.515
Microtubule-actin cross-linking factor 1, isoforms 1/2/3/5=Homo sapiens GN=MACF1 PE=1 SV=4	MACF1_HUMAN	1	4	4	4	0.01
Nucleophosmin=Homo sapiens GN=NPM1 PE=1 SV=2	NPM_HUMAN	1	3	4	15	0.163
Electron transfer flavoprotein subunit alpha, mitochondrial=Homo sapiens GN=ETFA PE=1 SV=1	ETFA_HUMAN	1	3	3	3	0.189
Brain-specific angiogenesis inhibitor 1-associated protein 2-like protein 1=Homo sapiens GN=BAIAP2L1 PE=1 SV=2	BI2L1_HUMAN	1	2	2	2	0.0881
Endoplasmic reticulum mannosyl-oligosaccharide 1,2-alpha-mannosidase=Homo sapiens GN=MAN1B1 PE=1 SV=2	MA1B1_HUMAN	1	2	2	2	0.0429
Solute carrier family 2, facilitated glucose transporter member 1=Homo sapiens GN=SLC2A1 PE=1 SV=2	GTR1_HUMAN	1	10	16	113	0.256
Abhydrolase domain-containing protein FAM108B1=Homo sapiens GN=FAM108B1 PE=2 SV=1	F108B_HUMAN	1	2	2	4	0.142
Carbohydrate sulfotransferase 11=Homo sapiens GN=CHST11 PE=1 SV=1	CHSTB_HUMAN	1	3	3	3	0.153
ATP synthase subunit beta, mitochondrial=Homo sapiens GN=ATP5B PE=1 SV=3	ATPB_HUMAN	1	12	14	27	0.391
Ras GTPase-activating-like protein IQGAP2=Homo sapiens GN=IQGAP2 PE=1 SV=4	IQGA2_HUMAN	1	9	9	9	0.0883
Peroxisomal multifunctional enzyme type 2=Homo sapiens GN=HSD17B4 PE=1 SV=3	DHB4_HUMAN	1	2	2	3	0.0312
40S ribosomal protein S7=Homo sapiens GN=RPS7 PE=1 SV=1	RS7_HUMAN	1	5	6	9	0.433
Band 4.1-like protein 2=Homo sapiens GN=EPB41L2 PE=1 SV=1	E41L2_HUMAN	1	15	16	24	0.219
Transferrin receptor protein 1=Homo sapiens GN=TFRC PE=1 SV=2	TFR1_HUMAN	1	31	47	173	0.586
Coiled-coil domain-containing protein 47=Homo sapiens GN=CCDC47 PE=1 SV=1	CCD47_HUMAN	1	4	4	4	0.0952
Tumor necrosis factor receptor superfamily member 10A=Homo sapiens GN=TNFRSF10A PE=1 SV=3	TR10A_HUMAN	1	4	5	6	0.137
Ig kappa chain C region=Homo sapiens GN=IGKC PE=1 SV=1	IGKC_HUMAN	1	5	9	92	0.802
Heat shock protein HSP 90-alpha=Homo sapiens GN=HSP90AA1 PE=1 SV=5	HS90A_HUMAN	1	7	9	38	0.243
Neutral alpha-glucosidase AB=Homo sapiens GN=GANAB PE=1 SV=3	GANAB_HUMAN	1	25	29	70	0.447
Cation-dependent mannose-6-phosphate receptor=Homo sapiens GN=M6PR PE=1 SV=1	MPRD_HUMAN	1	2	2	2	0.116
Poly(rC)-binding protein 1=Homo sapiens GN=PCBP1 PE=1 SV=2	PCBP1_HUMAN	1	3	3	3	0.154
Protein disulfide-isomerase A6=Homo sapiens GN=PDIA6 PE=1 SV=1	PDIA6_HUMAN	1	10	14	38	0.375
Ferritin heavy chain=Homo sapiens GN=FTH1 PE=1 SV=2	FRIH_HUMAN	1	3	3	4	0.197
Tripeptidyl-peptidase 1=Homo sapiens GN=TPP1 PE=1 SV=2	TPP1_HUMAN	1	6	8	21	0.222
Polypeptide N-acetylgalactosaminyltransferase 2=Homo sapiens GN=GALNT2 PE=1 SV=1	GALT2_HUMAN	1	6	6	7	0.159
Leukocyte surface antigen CD47=Homo sapiens GN=CD47 PE=1 SV=1	CD47_HUMAN	1	2	2	4	0.0588
Guanine nucleotide-binding protein G(I)/G(S)/G(O) subunit gamma-4=Homo sapiens GN=GNG4 PE=1 SV=1	GBG4_HUMAN	1	2	2	3	0.44
Trophoblast glycoprotein=Homo sapiens GN=TPBG PE=1 SV=1	TPBG_HUMAN	1	5	6	10	0.162
Sequestosome-1=Homo sapiens GN=SQSTM1 PE=1 SV=1	SQSTM_HUMAN	1	5	5	5	0.198
Afadin=Homo sapiens GN=MLLT4 PE=1 SV=3	AFAD_HUMAN	1	2	2	2	0.0186
Zinc transporter ZIP14=Homo sapiens GN=SLC39A14 PE=1 SV=3	S39AE_HUMAN	1	3	4	10	0.0915
Calreticulin=Homo sapiens GN=CALR PE=1 SV=1	CALR_HUMAN	1	14	17	31	0.635
Lysosomal alpha-glucosidase=Homo sapiens GN=GAA PE=1 SV=4	LYAG_HUMAN	1	3	3	3	0.0599
GTPase KRas=Homo sapiens GN=KRAS PE=1 SV=1	RASK_HUMAN	1	3	4	18	0.603
Vimentin=Homo sapiens GN=VIM PE=1 SV=4	VIME_HUMAN	1	2	2	3	0.0708
AP-2 complex subunit beta=Homo sapiens GN=AP2B1 PE=1 SV=1	AP2B1_HUMAN	1	4	4	18	0.133
Poly(rC)-binding protein 2=Homo sapiens GN=PCBP2 PE=1 SV=1	PCBP2_HUMAN	1	2	3	8	0.0795
60S ribosomal protein L24=Homo sapiens GN=RPL24 PE=1 SV=1	RL24_HUMAN	1	2	2	4	0.134
Alpha-actinin-4=Homo sapiens GN=ACTN4 PE=1 SV=2	ACTN4_HUMAN	1	26	32	122	0.618
Elongation factor Tu, mitochondrial=Homo sapiens GN=TUFM PE=1 SV=2	EFTU_HUMAN	1	2	2	2	0.102
60S ribosomal protein L7=Homo sapiens GN=RPL7 PE=1 SV=1	RL7_HUMAN	1	7	9	11	0.254
CTD small phosphatase-like protein=Homo sapiens GN=CTDSPL PE=1 SV=2	CTDSL_HUMAN	1	3	3	3	0.127
Guanine nucleotide-binding protein G(I)/G(S)/G(O) subunit gamma-12=Homo sapiens GN=GNG12 PE=1 SV=3	GBG12_HUMAN	1	2	3	4	0.417
Elongation factor 1-alpha 1=Homo sapiens GN=EEF1A1 PE=1 SV=1	EF1A1_HUMAN	1	6	10	41	0.372
Leucine-rich repeat-containing protein 1=Homo sapiens GN=LRRC1 PE=1 SV=1	LRRC1_HUMAN	1	3	3	7	0.132
Lanosterol 14-alpha demethylase=Homo sapiens GN=CYP51A1 PE=1 SV=3	CP51A_HUMAN	1	12	12	18	0.332
Immunoglobulin J chain=Homo sapiens GN=IGJ PE=1 SV=4	IGJ_HUMAN	1	5	5	9	0.371
Ras-related protein Rab-10=Homo sapiens GN=RAB10 PE=1 SV=1	RAB10_HUMAN	1	2	4	22	0.215
Prohibitin=Homo sapiens GN=PHB PE=1 SV=1	PHB_HUMAN	1	8	9	14	0.5
Ras-related C3 botulinum toxin substrate 1=Homo sapiens GN=RAC1 PE=1 SV=1	RAC1_HUMAN	1	9	14	29	0.599
CD44 antigen=Homo sapiens GN=CD44 PE=1 SV=3	CD44_HUMAN	1	6	8	20	0.0836
Na(+)/H(+) exchange regulatory cofactor NHE-RF2=Homo sapiens GN=SLC9A3R2 PE=1 SV=2	NHRF2_HUMAN	1	2	2	2	0.0712
Sorting nexin-27=Homo sapiens GN=SNX27 PE=1 SV=2	SNX27_HUMAN	1	1	1	2	0.0425
Guanine nucleotide-binding protein G(q) subunit alpha=Homo sapiens GN=GNAQ PE=1 SV=4	GNAQ_HUMAN	1	3	3	11	0.309
T-complex protein 1 subunit theta=Homo sapiens GN=CCT8 PE=1 SV=4	TCPQ_HUMAN	1	2	2	2	0.0511
Solute carrier family 2, facilitated glucose transporter member 3=Homo sapiens GN=SLC2A3 PE=1 SV=1	GTR3_HUMAN	1	13	21	60	0.306
N-acetylglucosamine-6-sulfatase=Homo sapiens GN=GNS PE=1 SV=3	GNS_HUMAN	1	9	10	14	0.237
Fatty acid-binding protein, epidermal=Homo sapiens GN=FABP5 PE=1 SV=3	FABP5_HUMAN	1	2	2	2	0.17
40S ribosomal protein S9=Homo sapiens GN=RPS9 PE=1 SV=3	RS9_HUMAN	1	2	2	2	0.0876
Staphylococcal nuclease domain-containing protein 1=Homo sapiens GN=SND1 PE=1 SV=1	SND1_HUMAN	1	8	10	17	0.135
60S ribosomal protein L12=Homo sapiens GN=RPL12 PE=1 SV=1	RL12_HUMAN	1	6	9	14	0.545
40S ribosomal protein S8=Homo sapiens GN=RPS8 PE=1 SV=2	RS8_HUMAN	1	3	3	3	0.173
ADP-ribosylation factor-like protein 8B=Homo sapiens GN=ARL8B PE=1 SV=1	ARL8B_HUMAN	1	2	2	14	0.505
Polymeric immunoglobulin receptor=Homo sapiens GN=PIGR PE=1 SV=4	PIGR_HUMAN	1	19	24	71	0.326
Tumor necrosis factor receptor superfamily member 10B=Homo sapiens GN=TNFRSF10B PE=1 SV=2	TR10B_HUMAN	1	2	3	5	0.0591
Monocarboxylate transporter 7=Homo sapiens GN=SLC16A6 PE=1 SV=2	MOT7_HUMAN	1	2	2	3	0.0478
Anoctamin-6=Homo sapiens GN=ANO6 PE=1 SV=2	ANO6_HUMAN	1	2	3	4	0.044
Leucyl-cystinyl aminopeptidase=Homo sapiens GN=LNPEP PE=1 SV=3	LCAP_HUMAN	1	4	5	6	0.0459
Heat shock protein HSP 90-beta=Homo sapiens GN=HSP90AB1 PE=1 SV=4	HS90B_HUMAN	1	3	4	34	0.175
Peroxiredoxin-1=Homo sapiens GN=PRDX1 PE=1 SV=1	PRDX1_HUMAN	1	1	1	7	0.146
Dolichyl-diphosphooligosaccharide--protein glycosyltransferase subunit STT3B=Homo sapiens GN=STT3B PE=1 SV=1	STT3B_HUMAN	1	1	1	1	0.0157
Hypoxia up-regulated protein 1=Homo sapiens GN=HYOU1 PE=1 SV=1	HYOU1_HUMAN	1	20	28	61	0.334
Signal recognition particle receptor subunit alpha=Homo sapiens GN=SRPR PE=1 SV=2	SRPR_HUMAN	1	7	8	10	0.166
Dolichyl-diphosphooligosaccharide--protein glycosyltransferase subunit STT3A=Homo sapiens GN=STT3A PE=1 SV=2	STT3A_HUMAN	1	3	4	9	0.0681
40S ribosomal protein S19=Homo sapiens GN=RPS19 PE=1 SV=2	RS19_HUMAN	1	4	5	5	0.214
40S ribosomal protein S18=Homo sapiens GN=RPS18 PE=1 SV=3	RS18_HUMAN	1	3	3	3	0.171
Flotillin-2=Homo sapiens GN=FLOT2 PE=1 SV=2	FLOT2_HUMAN	1	4	4	4	0.133
Choline transporter-like protein 1=Homo sapiens GN=SLC44A1 PE=1 SV=1	CTL1_HUMAN	1	3	3	3	0.0624
Neuroplastin=Homo sapiens GN=NPTN PE=1 SV=2	NPTN_HUMAN	1	3	3	3	0.093
Flotillin-1=Homo sapiens GN=FLOT1 PE=1 SV=3	FLOT1_HUMAN	1	5	6	6	0.183
Putative phospholipase B-like 2=Homo sapiens GN=PLBD2 PE=1 SV=2	PLBL2_HUMAN	1	1	1	1	0.0204
60S ribosomal protein L27=Homo sapiens GN=RPL27 PE=1 SV=2	RL27_HUMAN	1	2	2	3	0.125
Haptoglobin=Homo sapiens GN=HP PE=1 SV=1	HPT_HUMAN	1	3	3	4	0.0764
Protein transport protein Sec61 subunit alpha isoform 1=Homo sapiens GN=SEC61A1 PE=1 SV=2	S61A1_HUMAN	1	6	7	9	0.223
Tyrosine-protein kinase receptor UFO=Homo sapiens GN=AXL PE=1 SV=3	UFO_HUMAN	1	4	4	4	0.0626
Occludin=Homo sapiens GN=OCLN PE=1 SV=1	OCLN_HUMAN	1	2	2	2	0.0517
Apolipoprotein A-II=Homo sapiens GN=APOA2 PE=1 SV=1	APOA2_HUMAN	1	2	2	3	0.47
60S ribosomal protein L9=Homo sapiens GN=RPL9 PE=1 SV=1	RL9_HUMAN	1	5	6	8	0.396
SPRY domain-containing protein 7=Homo sapiens GN=SPRYD7 PE=1 SV=2	SPRY7_HUMAN	1	3	3	3	0.214
Peptidyl-tRNA hydrolase 2, mitochondrial=Homo sapiens GN=PTRH2 PE=1 SV=1	PTH2_HUMAN	1	2	2	4	0.162
Programmed cell death protein 6=Homo sapiens GN=PDCD6 PE=1 SV=1	PDCD6_HUMAN	1	2	2	2	0.105
Ras-related protein Rab-13=Homo sapiens GN=RAB13 PE=1 SV=1	RAB13_HUMAN	1	3	3	11	0.266
Lipolysis-stimulated lipoprotein receptor=Homo sapiens GN=LSR PE=1 SV=4	LSR_HUMAN	1	2	2	3	0.0478
Reticulocalbin-1=Homo sapiens GN=RCN1 PE=1 SV=1	RCN1_HUMAN	1	6	10	22	0.299
Glucosylceramidase=Homo sapiens GN=GBA PE=1 SV=3	GLCM_HUMAN	1	6	7	9	0.265
Deleted in malignant brain tumors 1 protein=Homo sapiens GN=DMBT1 PE=1 SV=2	DMBT1_HUMAN	1	11	14	28	0.075
Adipocyte plasma membrane-associated protein=Homo sapiens GN=APMAP PE=1 SV=2	APMAP_HUMAN	1	9	10	15	0.312
Protein scribble homolog=Homo sapiens GN=SCRIB PE=1 SV=4	SCRIB_HUMAN	1	10	12	32	0.123
Protein NDRG1=Homo sapiens GN=NDRG1 PE=1 SV=1	NDRG1_HUMAN	1	8	8	10	0.409
Protein sprouty homolog 4=Homo sapiens GN=SPRY4 PE=1 SV=2	SPY4_HUMAN	1	2	2	2	0.087
Annexin A2=Homo sapiens GN=ANXA2 PE=1 SV=2	ANXA2_HUMAN	1	8	18	541	0.696
Plexin-A1=Homo sapiens GN=PLXNA1 PE=1 SV=3	PLXA1_HUMAN	1	7	7	9	0.058
Guanine nucleotide-binding protein G(s) subunit alpha isoforms XLas=Homo sapiens GN=GNAS PE=1 SV=2	GNAS1_HUMAN	1	12	14	38	0.184
Annexin A1=Homo sapiens GN=ANXA1 PE=1 SV=2	ANXA1_HUMAN	1	2	4	11	0.0896
Nucleobindin-2=Homo sapiens GN=NUCB2 PE=1 SV=2	NUCB2_HUMAN	1	2	2	4	0.0714
Nuclease-sensitive element-binding protein 1=Homo sapiens GN=YBX1 PE=1 SV=3	YBOX1_HUMAN	1	2	2	2	0.12
Protein LYRIC=Homo sapiens GN=MTDH PE=1 SV=2	LYRIC_HUMAN	1	3	3	4	0.0601
Nucleobindin-1=Homo sapiens GN=NUCB1 PE=1 SV=4	NUCB1_HUMAN	1	2	3	3	0.0586
Plectin=Homo sapiens GN=PLEC PE=1 SV=3	PLEC_HUMAN	1	4	4	5	0.0179
Ig mu chain C region=Homo sapiens GN=IGHM PE=1 SV=3	IGHM_HUMAN	1	6	6	8	0.181
Poliovirus receptor=Homo sapiens GN=PVR PE=1 SV=2	PVR_HUMAN	1	2	2	2	0.06
Phosphate carrier protein, mitochondrial=Homo sapiens GN=SLC25A3 PE=1 SV=2	MPCP_HUMAN	1	2	2	4	0.0552
Transforming protein RhoA=Homo sapiens GN=RHOA PE=1 SV=1	RHOA_HUMAN	1	2	2	5	0.321
Retinoid-inducible serine carboxypeptidase=Homo sapiens GN=SCPEP1 PE=1 SV=1	RISC_HUMAN	1	3	3	3	0.0819
Transcobalamin-1=Homo sapiens GN=TCN1 PE=1 SV=2	TCO1_HUMAN	1	2	3	8	0.0739
Golgi apparatus protein 1=Homo sapiens GN=GLG1 PE=1 SV=2	GSLG1_HUMAN	1	13	17	24	0.159
Ig lambda-2 chain C regions=Homo sapiens GN=IGLC2 PE=1 SV=1	LAC2_HUMAN	1	4	9	24	0.651
Dermcidin=Homo sapiens GN=DCD PE=1 SV=2	DCD_HUMAN	1	2	2	2	0.227
Dolichyl-diphosphooligosaccharide--protein glycosyltransferase 48 kDa subunit=Homo sapiens GN=DDOST PE=1 SV=4	OST48_HUMAN	1	9	10	17	0.346
Sodium/potassium-transporting ATPase subunit beta-1=Homo sapiens GN=ATP1B1 PE=1 SV=1	AT1B1_HUMAN	1	5	6	9	0.244
Ferritin light chain=Homo sapiens GN=FTL PE=1 SV=2	FRIL_HUMAN	1	4	7	17	0.286
Polypeptide N-acetylgalactosaminyltransferase 6=Homo sapiens GN=GALNT6 PE=2 SV=2	GALT6_HUMAN	1	6	6	7	0.193
Ras-related protein Rab-11A=Homo sapiens GN=RAB11A PE=1 SV=3	RB11A_HUMAN	1	2	2	4	0.111
Thyroid receptor-interacting protein 11=Homo sapiens GN=TRIP11 PE=1 SV=3	TRIPB_HUMAN	1	2	2	2	0.0152
FERM domain-containing protein 8=Homo sapiens GN=FRMD8 PE=1 SV=1	FRMD8_HUMAN	1	1	1	1	0.0668
NADPH--cytochrome P450 reductase=Homo sapiens GN=POR PE=1 SV=2	NCPR_HUMAN	1	4	4	9	0.111
Keratin, type I cytoskeletal 14=Homo sapiens GN=KRT14 PE=1 SV=4	K1C14_HUMAN	1	2	2	7	0.174
Fatty acid synthase=Homo sapiens GN=FASN PE=1 SV=3	FAS_HUMAN	1	3	4	7	0.0247
Protein RFT1 homolog=Homo sapiens GN=RFT1 PE=1 SV=1	RFT1_HUMAN	1	2	2	2	0.0481
Leucine-rich PPR motif-containing protein, mitochondrial=Homo sapiens GN=LRPPRC PE=1 SV=3	LPPRC_HUMAN	1	4	4	5	0.0466
60S ribosomal protein L28=Homo sapiens GN=RPL28 PE=1 SV=3	RL28_HUMAN	1	3	3	3	0.219
V-type proton ATPase subunit F=Homo sapiens GN=ATP6V1F PE=1 SV=2	VATF_HUMAN	1	2	2	2	0.345
60S acidic ribosomal protein P0=Homo sapiens GN=RPLP0 PE=1 SV=1	RLA0_HUMAN	1	5	7	9	0.224
Myosin-9=Homo sapiens GN=MYH9 PE=1 SV=4	MYH9_HUMAN	1	16	18	27	0.147
DnaJ homolog subfamily B member 11=Homo sapiens GN=DNAJB11 PE=1 SV=1	DJB11_HUMAN	1	2	2	2	0.0754
Vigilin=Homo sapiens GN=HDLBP PE=1 SV=2	VIGLN_HUMAN	1	2	2	2	0.026
60S ribosomal protein L10a=Homo sapiens GN=RPL10A PE=1 SV=2	RL10A_HUMAN	1	5	6	11	0.272
40S ribosomal protein S11=Homo sapiens GN=RPS11 PE=1 SV=3	RS11_HUMAN	1	4	4	4	0.297
Galectin-3-binding protein=Homo sapiens GN=LGALS3BP PE=1 SV=1	LG3BP_HUMAN	1	8	10	18	0.222
Ras-related protein Rab-14=Homo sapiens GN=RAB14 PE=1 SV=4	RAB14_HUMAN	1	2	2	2	0.167
EH domain-containing protein 4=Homo sapiens GN=EHD4 PE=1 SV=1	EHD4_HUMAN	1	3	3	3	0.0665
Transmembrane protein 87A=Homo sapiens GN=TMEM87A PE=1 SV=3	TM87A_HUMAN	1	2	2	3	0.0577
60S ribosomal protein L30=Homo sapiens GN=RPL30 PE=1 SV=2	RL30_HUMAN	1	2	2	4	0.243
Cathepsin D=Homo sapiens GN=CTSD PE=1 SV=1	CATD_HUMAN	1	14	21	76	0.485
Peptidyl-prolyl cis-trans isomerase FKBP2=Homo sapiens GN=FKBP2 PE=1 SV=2	FKBP2_HUMAN	1	2	2	3	0.141
Vesicle transport protein SFT2C=Homo sapiens GN=SFT2D3 PE=2 SV=1	SFT2C_HUMAN	1	2	2	3	0.116
Solute carrier organic anion transporter family member 4A1=Homo sapiens GN=SLCO4A1 PE=1 SV=2	SO4A1_HUMAN	1	2	2	3	0.0332
Annexin A3=Homo sapiens GN=ANXA3 PE=1 SV=3	ANXA3_HUMAN	1	2	2	2	0.0774
Golgin subfamily B member 1=Homo sapiens GN=GOLGB1 PE=1 SV=2	GOGB1_HUMAN	1	7	7	8	0.0338
Pituitary tumor-transforming gene 1 protein-interacting protein=Homo sapiens GN=PTTG1IP PE=1 SV=1	PTTG_HUMAN	1	2	4	10	0.167
Transmembrane emp24 domain-containing protein 10=Homo sapiens GN=TMED10 PE=1 SV=2	TMEDA_HUMAN	1	4	7	30	0.224
Neuroblast differentiation-associated protein AHNAK=Homo sapiens GN=AHNAK PE=1 SV=2	AHNK_HUMAN	1	207	270	521	0.46
F-actin-capping protein subunit beta=Homo sapiens GN=CAPZB PE=1 SV=4	CAPZB_HUMAN	1	2	2	3	0.119
Mitochondrial import inner membrane translocase subunit TIM50=Homo sapiens GN=TIMM50 PE=1 SV=2	TIM50_HUMAN	1	2	2	3	0.0623
Ribosome-binding protein 1=Homo sapiens GN=RRBP1 PE=1 SV=4	RRBP1_HUMAN	1	3	3	3	0.0248
Rho-related GTP-binding protein RhoB=Homo sapiens GN=RHOB PE=1 SV=1	RHOB_HUMAN	1	4	4	11	0.541
Peroxiredoxin-4=Homo sapiens GN=PRDX4 PE=1 SV=1	PRDX4_HUMAN	1	4	4	9	0.247
Cation-independent mannose-6-phosphate receptor=Homo sapiens GN=IGF2R PE=1 SV=3	MPRI_HUMAN	1	8	8	9	0.0446
Ras-related protein Rab-2A=Homo sapiens GN=RAB2A PE=1 SV=1	RAB2A_HUMAN	1	6	7	12	0.358
Catechol O-methyltransferase=Homo sapiens GN=COMT PE=1 SV=2	COMT_HUMAN	1	2	2	2	0.14
Solute carrier family 12 member 2=Homo sapiens GN=SLC12A2 PE=1 SV=1	S12A2_HUMAN	1	5	5	5	0.052
Lysozyme C=Homo sapiens GN=LYZ PE=1 SV=1	LYSC_HUMAN	1	5	8	32	0.459
Sodium/potassium-transporting ATPase subunit beta-3=Homo sapiens GN=ATP1B3 PE=1 SV=1	AT1B3_HUMAN	1	13	15	34	0.62
HIG1 domain family member 2A, mitochondrial=Homo sapiens GN=HIGD2A PE=1 SV=1	HIG2A_HUMAN	1	2	2	2	0.434
Golgi integral membrane protein 4=Homo sapiens GN=GOLIM4 PE=1 SV=1	GOLI4_HUMAN	1	3	3	3	0.0517
N-acetylgalactosaminyltransferase 7=Homo sapiens GN=GALNT7 PE=1 SV=1	GALT7_HUMAN	1	3	3	4	0.0441
Zymogen granule protein 16 homolog B=Homo sapiens GN=ZG16B PE=1 SV=3	ZG16B_HUMAN	1	6	8	28	0.452
Insulin-like growth factor 1 receptor=Homo sapiens GN=IGF1R PE=1 SV=1	IGF1R_HUMAN	1	2	2	2	0.03
CUB domain-containing protein 1=Homo sapiens GN=CDCP1 PE=1 SV=3	CDCP1_HUMAN	1	17	17	29	0.257
H(+)/Cl(-) exchange transporter 7=Homo sapiens GN=CLCN7 PE=1 SV=2	CLCN7_HUMAN	1	2	2	2	0.0211
Transmembrane 7 superfamily member 3=Homo sapiens GN=TM7SF3 PE=2 SV=1	TM7S3_HUMAN	1	2	3	4	0.0456
Serine/threonine-protein phosphatase PP1-alpha catalytic subunit=Homo sapiens GN=PPP1CA PE=1 SV=1	PP1A_HUMAN	1	3	3	22	0.379
Cathepsin L1=Homo sapiens GN=CTSL1 PE=1 SV=2	CATL1_HUMAN	1	4	5	12	0.222
Lysosomal protective protein=Homo sapiens GN=CTSA PE=1 SV=2	PPGB_HUMAN	1	8	11	20	0.213
Extended synaptotagmin-1=Homo sapiens GN=ESYT1 PE=1 SV=1	ESYT1_HUMAN	1	19	25	66	0.287
60S acidic ribosomal protein P2=Homo sapiens GN=RPLP2 PE=1 SV=1	RLA2_HUMAN	1	4	6	20	0.478
T-complex protein 1 subunit alpha=Homo sapiens GN=TCP1 PE=1 SV=1	TCPA_HUMAN	1	2	2	2	0.0791
60S acidic ribosomal protein P1=Homo sapiens GN=RPLP1 PE=1 SV=1	RLA1_HUMAN	1	2	3	12	0.518
Beta-hexosaminidase subunit beta=Homo sapiens GN=HEXB PE=1 SV=3	HEXB_HUMAN	1	14	16	28	0.378
Protein CREG1=Homo sapiens GN=CREG1 PE=1 SV=1	CREG1_HUMAN	1	2	2	3	0.15
Endoplasmic reticulum resident protein 44=Homo sapiens GN=ERP44 PE=1 SV=1	ERP44_HUMAN	1	2	2	2	0.0961
Nebulette=Homo sapiens GN=NEBL PE=1 SV=1	NEBL_HUMAN	1	2	2	2	0.0237
Beta-hexosaminidase subunit alpha=Homo sapiens GN=HEXA PE=1 SV=2	HEXA_HUMAN	1	6	6	10	0.164
40S ribosomal protein S23=Homo sapiens GN=RPS23 PE=1 SV=3	RS23_HUMAN	1	2	2	2	0.266
Transketolase=Homo sapiens GN=TKT PE=1 SV=3	TKT_HUMAN	1	2	2	2	0.0498
Metal transporter CNNM3=Homo sapiens GN=CNNM3 PE=1 SV=1	CNNM3_HUMAN	1	4	4	4	0.099
Ras-related protein Rab-35=Homo sapiens GN=RAB35 PE=1 SV=1	RAB35_HUMAN	1	3	5	14	0.333
60S ribosomal protein L31=Homo sapiens GN=RPL31 PE=1 SV=1	RL31_HUMAN	1	2	2	2	0.176
Annexin A5=Homo sapiens GN=ANXA5 PE=1 SV=2	ANXA5_HUMAN	1	9	12	34	0.353
CDGSH iron-sulfur domain-containing protein 2=Homo sapiens GN=CISD2 PE=1 SV=1	CISD2_HUMAN	1	1	1	1	0.104
Synaptosomal-associated protein 23=Homo sapiens GN=SNAP23 PE=1 SV=1	SNP23_HUMAN	1	3	3	4	0.232
FERM, RhoGEF and pleckstrin domain-containing protein 1=Homo sapiens GN=FARP1 PE=1 SV=1	FARP1_HUMAN	1	8	8	10	0.0967
Annexin A4=Homo sapiens GN=ANXA4 PE=1 SV=4	ANXA4_HUMAN	1	8	10	21	0.335
Ubiquitin-40S ribosomal protein S27a=Homo sapiens GN=RPS27A PE=1 SV=2	RS27A_HUMAN	1	4	6	16	0.301
Equilibrative nucleoside transporter 1=Homo sapiens GN=SLC29A1 PE=1 SV=3	S29A1_HUMAN	1	2	2	2	0.057
Large neutral amino acids transporter small subunit 1=Homo sapiens GN=SLC7A5 PE=1 SV=2	LAT1_HUMAN	1	6	9	30	0.172
Protein transport protein Sec24C=Homo sapiens GN=SEC24C PE=1 SV=3	SC24C_HUMAN	1	2	2	2	0.0238
10 kDa heat shock protein, mitochondrial=Homo sapiens GN=HSPE1 PE=1 SV=2	CH10_HUMAN	1	2	4	16	0.255
V-type proton ATPase catalytic subunit A=Homo sapiens GN=ATP6V1A PE=1 SV=2	VATA_HUMAN	1	12	14	21	0.371
Tissue alpha-L-fucosidase=Homo sapiens GN=FUCA1 PE=1 SV=4	FUCO_HUMAN	1	2	2	3	0.0472
Beta-2-microglobulin=Homo sapiens GN=B2M PE=1 SV=1	B2MG_HUMAN	1	3	5	7	0.378
CAD protein=Homo sapiens GN=CAD PE=1 SV=3	PYR1_HUMAN	1	5	5	5	0.0333
GDP-fucose protein O-fucosyltransferase 1=Homo sapiens GN=POFUT1 PE=1 SV=1	OFUT1_HUMAN	1	2	2	3	0.116
Eukaryotic initiation factor 4A-I=Homo sapiens GN=EIF4A1 PE=1 SV=1	IF4A1_HUMAN	1	1	1	3	0.15
40S ribosomal protein S3a=Homo sapiens GN=RPS3A PE=1 SV=2	RS3A_HUMAN	1	6	6	8	0.292
Serine/threonine-protein kinase 11-interacting protein=Homo sapiens GN=STK11IP PE=1 SV=3	S11IP_HUMAN	1	4	6	8	0.0591
Serpin H1=Homo sapiens GN=SERPINH1 PE=1 SV=2	SERPH_HUMAN	1	17	26	82	0.615
Epidermal growth factor receptor=Homo sapiens GN=EGFR PE=1 SV=2	EGFR_HUMAN	1	13	15	21	0.135
Septin-2=Homo sapiens GN=SEPT2 PE=1 SV=1	SEPT2_HUMAN	1	4	7	11	0.177
Septin-11=Homo sapiens GN=SEPT11 PE=1 SV=3	SEP11_HUMAN	1	1	1	4	0.0979
Carboxypeptidase D=Homo sapiens GN=CPD PE=1 SV=2	CBPD_HUMAN	1	6	7	12	0.0486
Tight junction protein ZO-1=Homo sapiens GN=TJP1 PE=1 SV=3	ZO1_HUMAN	1	5	5	5	0.0458
Alkyldihydroxyacetonephosphate synthase, peroxisomal=Homo sapiens GN=AGPS PE=1 SV=1	ADAS_HUMAN	1	3	3	4	0.0638
Polyadenylate-binding protein 1=Homo sapiens GN=PABPC1 PE=1 SV=2	PABP1_HUMAN	1	0	0	10	0.165
Serine/threonine-protein kinase 24=Homo sapiens GN=STK24 PE=1 SV=1	STK24_HUMAN	1	3	3	3	0.131
Translocon-associated protein subunit alpha=Homo sapiens GN=SSR1 PE=1 SV=3	SSRA_HUMAN	1	2	3	5	0.0804
Annexin A11=Homo sapiens GN=ANXA11 PE=1 SV=1	ANX11_HUMAN	1	8	9	20	0.182
Intermediate conductance calcium-activated potassium channel protein 4=Homo sapiens GN=KCNN4 PE=1 SV=1	KCNN4_HUMAN	1	2	2	2	0.0539
Stromal interaction molecule 1=Homo sapiens GN=STIM1 PE=1 SV=3	STIM1_HUMAN	1	4	4	4	0.0686
Transmembrane protein 106B=Homo sapiens GN=TMEM106B PE=1 SV=2	T106B_HUMAN	1	2	2	2	0.0839
60S ribosomal protein L27a=Homo sapiens GN=RPL27A PE=1 SV=2	RL27A_HUMAN	1	4	4	6	0.223
CD151 antigen=Homo sapiens GN=CD151 PE=1 SV=3	CD151_HUMAN	1	3	4	4	0.107
Prohibitin-2=Homo sapiens GN=PHB2 PE=1 SV=2	PHB2_HUMAN	1	5	6	11	0.244
78 kDa glucose-regulated protein=Homo sapiens GN=HSPA5 PE=1 SV=2	GRP78_HUMAN	1	24	36	106	0.546
Serum albumin=Homo sapiens GN=ALB PE=1 SV=2	ALBU_HUMAN	1	38	54	160	0.724
Delta(24)-sterol reductase=Homo sapiens GN=DHCR24 PE=1 SV=2	DHC24_HUMAN	1	5	6	9	0.155
Keratin, type I cytoskeletal 18=Homo sapiens GN=KRT18 PE=1 SV=2	K1C18_HUMAN	1	4	5	9	0.153
CD97 antigen=Homo sapiens GN=CD97 PE=1 SV=4	CD97_HUMAN	1	8	9	23	0.158
Ras-related protein R-Ras2=Homo sapiens GN=RRAS2 PE=1 SV=1	RRAS2_HUMAN	1	2	2	2	0.118
Malate dehydrogenase, mitochondrial=Homo sapiens GN=MDH2 PE=1 SV=3	MDHM_HUMAN	1	13	15	36	0.515
Thioredoxin domain-containing protein 5=Homo sapiens GN=TXNDC5 PE=1 SV=2	TXND5_HUMAN	1	9	10	18	0.257
Disks large homolog 1=Homo sapiens GN=DLG1 PE=1 SV=2	DLG1_HUMAN	1	7	7	9	0.101
Oxysterol-binding protein-related protein 8=Homo sapiens GN=OSBPL8 PE=1 SV=3	OSBL8_HUMAN	1	3	3	4	0.0427
Drebrin=Homo sapiens GN=DBN1 PE=1 SV=4	DREB_HUMAN	1	4	4	5	0.0924
Ephrin-B1=Homo sapiens GN=EFNB1 PE=1 SV=1	EFNB1_HUMAN	1	2	3	6	0.0896
7-dehydrocholesterol reductase=Homo sapiens GN=DHCR7 PE=1 SV=1	DHCR7_HUMAN	1	3	3	3	0.0674
40S ribosomal protein S25=Homo sapiens GN=RPS25 PE=1 SV=1	RS25_HUMAN	1	2	2	4	0.152
Vesicle-trafficking protein SEC22b=Homo sapiens GN=SEC22B PE=1 SV=4	SC22B_HUMAN	1	1	2	5	0.0558
Syntenin-1=Homo sapiens GN=SDCBP PE=1 SV=1	SDCB1_HUMAN	1	3	4	6	0.228
FAS-associated factor 2=Homo sapiens GN=FAF2 PE=1 SV=2	FAF2_HUMAN	1	4	5	10	0.166
Dehydrogenase/reductase SDR family member 7B=Homo sapiens GN=DHRS7B PE=1 SV=2	DRS7B_HUMAN	1	2	3	4	0.0923
Niban-like protein 1=Homo sapiens GN=FAM129B PE=1 SV=3	NIBL1_HUMAN	1	4	4	4	0.109
Metal transporter CNNM4=Homo sapiens GN=CNNM4 PE=1 SV=3	CNNM4_HUMAN	1	3	3	3	0.0632
ADP-ribosylation factor-like protein 6-interacting protein 1=Homo sapiens GN=ARL6IP1 PE=1 SV=2	AR6P1_HUMAN	1	2	3	5	0.187
Annexin A6=Homo sapiens GN=ANXA6 PE=1 SV=3	ANXA6_HUMAN	1	39	60	173	0.71
Plasma membrane calcium-transporting ATPase 1=Homo sapiens GN=ATP2B1 PE=1 SV=3	AT2B1_HUMAN	1	4	5	14	0.0851
BPI fold-containing family A member 1=Homo sapiens GN=BPIFA1 PE=1 SV=1	BPIA1_HUMAN	1	6	12	35	0.344
Ras-related protein Rab-7a=Homo sapiens GN=RAB7A PE=1 SV=1	RAB7A_HUMAN	1	11	16	46	0.618
Protein THEM6=Homo sapiens GN=THEM6 PE=1 SV=2	THEM6_HUMAN	1	3	3	3	0.173
Vacuolar protein sorting-associated protein 35=Homo sapiens GN=VPS35 PE=1 SV=2	VPS35_HUMAN	1	7	7	7	0.106
60S ribosomal protein L10=Homo sapiens GN=RPL10 PE=1 SV=4	RL10_HUMAN	1	5	5	5	0.215
Intercellular adhesion molecule 2=Homo sapiens GN=ICAM2 PE=1 SV=2	ICAM2_HUMAN	1	2	3	5	0.113
Glycosyltransferase 8 domain-containing protein 1=Homo sapiens GN=GLT8D1 PE=1 SV=2	GL8D1_HUMAN	1	1	1	2	0.0296
Cysteine and glycine-rich protein 1=Homo sapiens GN=CSRP1 PE=1 SV=3	CSRP1_HUMAN	1	3	3	4	0.28
Scavenger receptor class B member 1=Homo sapiens GN=SCARB1 PE=1 SV=1	SCRB1_HUMAN	1	8	10	19	0.228
Talin-1=Homo sapiens GN=TLN1 PE=1 SV=3	TLN1_HUMAN	1	4	4	4	0.0295
ERO1-like protein alpha=Homo sapiens GN=ERO1L PE=1 SV=2	ERO1A_HUMAN	1	4	4	5	0.103
Integrin alpha-2=Homo sapiens GN=ITGA2 PE=1 SV=1	ITA2_HUMAN	1	2	2	2	0.022
Ras-related protein Rap-1A=Homo sapiens GN=RAP1A PE=1 SV=1	RAP1A_HUMAN	1	2	2	29	0.56
Phosphatidylinositol 4-kinase type 2-alpha=Homo sapiens GN=PI4K2A PE=1 SV=1	P4K2A_HUMAN	1	4	4	4	0.121
Chloride intracellular channel protein 1=Homo sapiens GN=CLIC1 PE=1 SV=4	CLIC1_HUMAN	1	2	2	2	0.112
Protein ERGIC-53=Homo sapiens GN=LMAN1 PE=1 SV=2	LMAN1_HUMAN	1	3	3	3	0.0863
Intercellular adhesion molecule 1=Homo sapiens GN=ICAM1 PE=1 SV=2	ICAM1_HUMAN	1	4	4	5	0.0902
Prolyl 4-hydroxylase subunit alpha-1=Homo sapiens GN=P4HA1 PE=1 SV=2	P4HA1_HUMAN	1	2	3	3	0.0618
Heat shock cognate 71 kDa protein=Homo sapiens GN=HSPA8 PE=1 SV=1	HSP7C_HUMAN	1	17	20	46	0.464
Palmitoyl-protein thioesterase 1=Homo sapiens GN=PPT1 PE=1 SV=1	PPT1_HUMAN	1	7	11	25	0.376
Acyl-CoA desaturase=Homo sapiens GN=SCD PE=1 SV=2	ACOD_HUMAN	1	2	2	2	0.0724
Sodium bicarbonate cotransporter 3=Homo sapiens GN=SLC4A7 PE=1 SV=2	S4A7_HUMAN	1	5	7	16	0.0857
Lactotransferrin=Homo sapiens GN=LTF PE=1 SV=6	TRFL_HUMAN	1	3	3	4	0.0479
Cystatin-F=Homo sapiens GN=CST7 PE=1 SV=1	CYTF_HUMAN	1	2	3	9	0.241
Endoplasmic reticulum-Golgi intermediate compartment protein 2=Homo sapiens GN=ERGIC2 PE=1 SV=2	ERGI2_HUMAN	1	2	2	3	0.0796
Secretoglobin family 1D member 2=Homo sapiens GN=SCGB1D2 PE=2 SV=1	SG1D2_HUMAN	1	3	3	6	0.322
Keratin, type I cytoskeletal 19=Homo sapiens GN=KRT19 PE=1 SV=4	K1C19_HUMAN	1	1	2	6	0.102
Uncharacterized protein C18orf8=Homo sapiens GN=C18orf8 PE=2 SV=2	MIC1_HUMAN	1	2	2	2	0.0441
Uncharacterized protein KIAA2013=Homo sapiens GN=KIAA2013 PE=2 SV=1	K2013_HUMAN	1	4	5	6	0.0931
B-cell receptor-associated protein 31=Homo sapiens GN=BCAP31 PE=1 SV=3	BAP31_HUMAN	1	3	3	4	0.154
Fructose-bisphosphate aldolase A=Homo sapiens GN=ALDOA PE=1 SV=2	ALDOA_HUMAN	1	20	30	107	0.681
Beta-galactosidase=Homo sapiens GN=GLB1 PE=1 SV=2	BGAL_HUMAN	1	11	13	26	0.192
Receptor-type tyrosine-protein phosphatase gamma=Homo sapiens GN=PTPRG PE=1 SV=4	PTPRG_HUMAN	1	2	2	2	0.0256
T-complex protein 1 subunit delta=Homo sapiens GN=CCT4 PE=1 SV=4	TCPD_HUMAN	1	1	1	2	0.0241
Cell division control protein 42 homolog=Homo sapiens GN=CDC42 PE=1 SV=2	CDC42_HUMAN	1	6	7	11	0.571
Vesicle-associated membrane protein 8=Homo sapiens GN=VAMP8 PE=1 SV=1	VAMP8_HUMAN	1	3	3	3	0.33
60 kDa heat shock protein, mitochondrial=Homo sapiens GN=HSPD1 PE=1 SV=2	CH60_HUMAN	1	28	38	88	0.649
Alpha-1,3-mannosyl-glycoprotein 2-beta-N-acetylglucosaminyltransferase=Homo sapiens GN=MGAT1 PE=2 SV=2	MGAT1_HUMAN	1	3	3	3	0.0989
40S ribosomal protein S26=Homo sapiens GN=RPS26 PE=1 SV=3	RS26_HUMAN	1	2	2	2	0.261
CAAX prenyl protease 1 homolog=Homo sapiens GN=ZMPSTE24 PE=1 SV=2	FACE1_HUMAN	1	3	4	5	0.109
Transgelin-2=Homo sapiens GN=TAGLN2 PE=1 SV=3	TAGL2_HUMAN	1	10	13	30	0.648
Surfeit locus protein 4=Homo sapiens GN=SURF4 PE=1 SV=3	SURF4_HUMAN	1	2	4	8	0.115
Spectrin beta chain, non-erythrocytic 1=Homo sapiens GN=SPTBN1 PE=1 SV=2	SPTB2_HUMAN	1	18	19	28	0.101
Reticulon-4=Homo sapiens GN=RTN4 PE=1 SV=2	RTN4_HUMAN	1	5	9	15	0.0763
T-complex protein 1 subunit zeta=Homo sapiens GN=CCT6A PE=1 SV=3	TCPZ_HUMAN	1	3	3	4	0.0621
Golgi membrane protein 1=Homo sapiens GN=GOLM1 PE=1 SV=1	GOLM1_HUMAN	1	4	4	4	0.115
Ras-related protein Rab-21=Homo sapiens GN=RAB21 PE=1 SV=3	RAB21_HUMAN	1	4	4	6	0.156
Mitochondrial fission 1 protein=Homo sapiens GN=FIS1 PE=1 SV=2	FIS1_HUMAN	1	3	3	4	0.237
Peflin=Homo sapiens GN=PEF1 PE=1 SV=1	PEF1_HUMAN	1	2	2	2	0.165
Inositol monophosphatase 3=Homo sapiens GN=IMPAD1 PE=1 SV=1	IMPA3_HUMAN	1	2	2	2	0.0669
Ragulator complex protein LAMTOR1=Homo sapiens GN=LAMTOR1 PE=1 SV=2	LTOR1_HUMAN	1	4	5	12	0.335
Neurofibromin=Homo sapiens GN=NF1 PE=1 SV=2	NF1_HUMAN	1	7	8	14	0.0419
V-type proton ATPase subunit D=Homo sapiens GN=ATP6V1D PE=1 SV=1	VATD_HUMAN	1	2	2	2	0.134
Ras-related protein Rab-5A=Homo sapiens GN=RAB5A PE=1 SV=2	RAB5A_HUMAN	1	2	2	11	0.228
Sortilin=Homo sapiens GN=SORT1 PE=1 SV=3	SORT_HUMAN	1	3	3	3	0.0445
Developmentally-regulated GTP-binding protein 1=Homo sapiens GN=DRG1 PE=1 SV=1	DRG1_HUMAN	1	2	2	2	0.0872
Lysosome membrane protein 2=Homo sapiens GN=SCARB2 PE=1 SV=2	SCRB2_HUMAN	1	5	7	14	0.186
Integrin alpha-3=Homo sapiens GN=ITGA3 PE=1 SV=5	ITA3_HUMAN	1	11	12	17	0.139
Ras-related protein Rap-1b=Homo sapiens GN=RAP1B PE=1 SV=1	RAP1B_HUMAN	1	1	1	28	0.62
MAGUK p55 subfamily member 6=Homo sapiens GN=MPP6 PE=1 SV=2	MPP6_HUMAN	1	12	13	17	0.259
Sulfhydryl oxidase 2=Homo sapiens GN=QSOX2 PE=1 SV=3	QSOX2_HUMAN	1	10	12	20	0.215
Perforin-1=Homo sapiens GN=PRF1 PE=1 SV=1	PERF_HUMAN	1	4	4	5	0.0793
Myosin light polypeptide 6=Homo sapiens GN=MYL6 PE=1 SV=2	MYL6_HUMAN	1	2	3	14	0.318
Protein tyrosine phosphatase type IVA 2=Homo sapiens GN=PTP4A2 PE=1 SV=1	TP4A2_HUMAN	1	2	3	4	0.138
Vesicular integral-membrane protein VIP36=Homo sapiens GN=LMAN2 PE=1 SV=1	LMAN2_HUMAN	1	6	6	9	0.281
Cytochrome c oxidase subunit 5B, mitochondrial=Homo sapiens GN=COX5B PE=1 SV=2	COX5B_HUMAN	1	2	2	2	0.155
Importin subunit beta-1=Homo sapiens GN=KPNB1 PE=1 SV=2	IMB1_HUMAN	1	3	4	7	0.0571
Guanine nucleotide-binding protein subunit beta-2-like 1=Homo sapiens GN=GNB2L1 PE=1 SV=3	GBLP_HUMAN	1	5	5	7	0.233
Translocon-associated protein subunit delta=Homo sapiens GN=SSR4 PE=1 SV=1	SSRD_HUMAN	1	3	3	6	0.249
Dolichyl-diphosphooligosaccharide--protein glycosyltransferase subunit 1=Homo sapiens GN=RPN1 PE=1 SV=1	RPN1_HUMAN	1	19	22	50	0.435
HLA class I histocompatibility antigen, B-82 alpha chain=Homo sapiens GN=HLA-B PE=2 SV=1	1B82_HUMAN	1	1	1	14	0.188
Beta-1,3-galactosyltransferase 6=Homo sapiens GN=B3GALT6 PE=2 SV=2	B3GT6_HUMAN	1	2	2	3	0.0547
Prenylcysteine oxidase 1=Homo sapiens GN=PCYOX1 PE=1 SV=3	PCYOX_HUMAN	1	5	5	5	0.15
Endoplasmic reticulum-Golgi intermediate compartment protein 3=Homo sapiens GN=ERGIC3 PE=1 SV=1	ERGI3_HUMAN	1	3	3	5	0.128
Tyrosine-protein kinase transmembrane receptor ROR2=Homo sapiens GN=ROR2 PE=1 SV=2	ROR2_HUMAN	1	2	2	2	0.0212
Signal peptidase complex subunit 2=Homo sapiens GN=SPCS2 PE=1 SV=3	SPCS2_HUMAN	1	1	1	1	0.0841
Myoferlin=Homo sapiens GN=MYOF PE=1 SV=1	MYOF_HUMAN	1	15	15	17	0.0941
Catenin beta-1=Homo sapiens GN=CTNNB1 PE=1 SV=1	CTNB1_HUMAN	1	2	2	3	0.0819
40S ribosomal protein S20=Homo sapiens GN=RPS20 PE=1 SV=1	RS20_HUMAN	1	2	2	3	0.193
Profilin-1=Homo sapiens GN=PFN1 PE=1 SV=2	PROF1_HUMAN	1	5	5	7	0.471
Prolactin-inducible protein=Homo sapiens GN=PIP PE=1 SV=1	PIP_HUMAN	1	4	5	12	0.356
Stress-70 protein, mitochondrial=Homo sapiens GN=HSPA9 PE=1 SV=2	GRP75_HUMAN	1	7	7	10	0.133
Syntaxin-binding protein 1=Homo sapiens GN=STXBP1 PE=1 SV=1	STXB1_HUMAN	1	2	2	2	0.0505
Fructose-bisphosphate aldolase C=Homo sapiens GN=ALDOC PE=1 SV=2	ALDOC_HUMAN	1	2	3	16	0.148
Tyrosine-protein kinase Lyn=Homo sapiens GN=LYN PE=1 SV=3	LYN_HUMAN	1	3	3	8	0.115
Keratin, type II cytoskeletal 1=Homo sapiens GN=KRT1 PE=1 SV=6	K2C1_HUMAN	1	11	13	27	0.191
Eukaryotic translation initiation factor 5A-1=Homo sapiens GN=EIF5A PE=1 SV=2	IF5A1_HUMAN	1	3	4	4	0.383
60S ribosomal protein L13a=Homo sapiens GN=RPL13A PE=1 SV=2	RL13A_HUMAN	1	2	2	2	0.108
T-complex protein 1 subunit epsilon=Homo sapiens GN=CCT5 PE=1 SV=1	TCPE_HUMAN	1	2	2	3	0.061
Peptidyl-prolyl cis-trans isomerase B=Homo sapiens GN=PPIB PE=1 SV=2	PPIB_HUMAN	1	11	13	34	0.495
Glyceraldehyde-3-phosphate dehydrogenase=Homo sapiens GN=GAPDH PE=1 SV=3	G3P_HUMAN	1	17	30	137	0.639
Kinectin=Homo sapiens GN=KTN1 PE=1 SV=1	KTN1_HUMAN	1	4	4	4	0.0479
Peptidyl-prolyl cis-trans isomerase A=Homo sapiens GN=PPIA PE=1 SV=2	PPIA_HUMAN	1	7	9	26	0.588
Neuropathy target esterase=Homo sapiens GN=PNPLA6 PE=1 SV=2	PLPL6_HUMAN	1	2	2	2	0.0271
Vesicle transport through interaction with t-SNAREs homolog 1B=Homo sapiens GN=VTI1B PE=1 SV=3	VTI1B_HUMAN	1	2	2	2	0.0862
Transmembrane emp24 domain-containing protein 2=Homo sapiens GN=TMED2 PE=1 SV=1	TMED2_HUMAN	1	3	4	10	0.264
Solute carrier family 35 member F2=Homo sapiens GN=SLC35F2 PE=1 SV=1	S35F2_HUMAN	1	2	2	2	0.0561
14-3-3 protein beta/alpha=Homo sapiens GN=YWHAB PE=1 SV=3	1433B_HUMAN	1	2	2	7	0.236
L-lactate dehydrogenase A chain=Homo sapiens GN=LDHA PE=1 SV=2	LDHA_HUMAN	1	10	12	17	0.473
Inhibitor of nuclear factor kappa-B kinase-interacting protein=Homo sapiens GN=IKBIP PE=1 SV=1	IKIP_HUMAN	1	1	1	1	0.0686
Syntaxin-4=Homo sapiens GN=STX4 PE=1 SV=2	STX4_HUMAN	1	3	3	3	0.165
Nicastrin=Homo sapiens GN=NCSTN PE=1 SV=2	NICA_HUMAN	1	5	6	14	0.113
Sigma non-opioid intracellular receptor 1=Homo sapiens GN=SIGMAR1 PE=1 SV=1	SGMR1_HUMAN	1	3	3	4	0.175
Ragulator complex protein LAMTOR3=Homo sapiens GN=LAMTOR3 PE=1 SV=1	LTOR3_HUMAN	1	2	2	3	0.266
Zinc transporter 7=Homo sapiens GN=SLC30A7 PE=1 SV=1	ZNT7_HUMAN	1	2	2	2	0.0691
Spectrin alpha chain, non-erythrocytic 1=Homo sapiens GN=SPTAN1 PE=1 SV=3	SPTN1_HUMAN	1	18	19	23	0.111
Minor histocompatibility antigen H13=Homo sapiens GN=HM13 PE=1 SV=1	HM13_HUMAN	1	2	2	5	0.0584
V-type proton ATPase subunit B, brain isoform=Homo sapiens GN=ATP6V1B2 PE=1 SV=3	VATB2_HUMAN	1	9	11	15	0.295
Ragulator complex protein LAMTOR2=Homo sapiens GN=LAMTOR2 PE=1 SV=1	LTOR2_HUMAN	1	4	5	8	0.416
Ephrin type-A receptor 2=Homo sapiens GN=EPHA2 PE=1 SV=2	EPHA2_HUMAN	1	21	23	37	0.311
60S ribosomal protein L14=Homo sapiens GN=RPL14 PE=1 SV=4	RL14_HUMAN	1	3	5	7	0.158
Zyxin=Homo sapiens GN=ZYX PE=1 SV=1	ZYX_HUMAN	1	3	3	3	0.0752
V-type proton ATPase subunit d 1=Homo sapiens GN=ATP6V0D1 PE=1 SV=1	VA0D1_HUMAN	1	2	2	2	0.105
60S ribosomal protein L13=Homo sapiens GN=RPL13 PE=1 SV=4	RL13_HUMAN	1	4	4	4	0.19
Protein S100-A10=Homo sapiens GN=S100A10 PE=1 SV=2	S10AA_HUMAN	1	4	8	51	0.546
Copine-3=Homo sapiens GN=CPNE3 PE=1 SV=1	CPNE3_HUMAN	1	9	10	17	0.212
Granulins=Homo sapiens GN=GRN PE=1 SV=2	GRN_HUMAN	1	2	2	3	0.0455
Elongation factor 1-delta=Homo sapiens GN=EEF1D PE=1 SV=5	EF1D_HUMAN	1	2	2	2	0.089
Radixin=Homo sapiens GN=RDX PE=1 SV=1	RADI_HUMAN	1	7	8	33	0.316
Lysophosphatidylcholine acyltransferase 2=Homo sapiens GN=LPCAT2 PE=1 SV=1	PCAT2_HUMAN	1	2	3	4	0.0809
MAGUK p55 subfamily member 7=Homo sapiens GN=MPP7 PE=1 SV=1	MPP7_HUMAN	1	2	2	2	0.0399
Tight junction protein ZO-2=Homo sapiens GN=TJP2 PE=1 SV=2	ZO2_HUMAN	1	3	3	3	0.0286
Septin-7=Homo sapiens GN=SEPT7 PE=1 SV=2	SEPT7_HUMAN	1	3	3	5	0.112
Heme oxygenase 2=Homo sapiens GN=HMOX2 PE=1 SV=2	HMOX2_HUMAN	1	4	5	7	0.184
Calnexin=Homo sapiens GN=CANX PE=1 SV=2	CALX_HUMAN	1	15	20	66	0.351
Niemann-Pick C1 protein=Homo sapiens GN=NPC1 PE=1 SV=2	NPC1_HUMAN	1	9	9	12	0.121
40S ribosomal protein S4, X isoform=Homo sapiens GN=RPS4X PE=1 SV=2	RS4X_HUMAN	1	5	5	10	0.259
4F2 cell-surface antigen heavy chain=Homo sapiens GN=SLC3A2 PE=1 SV=3	4F2_HUMAN	1	29	52	268	0.541
Glucose-6-phosphate isomerase=Homo sapiens GN=GPI PE=1 SV=4	G6PI_HUMAN	1	2	3	5	0.0556
Dolichyl-diphosphooligosaccharide--protein glycosyltransferase subunit 2=Homo sapiens GN=RPN2 PE=1 SV=3	RPN2_HUMAN	1	16	20	50	0.578
Estradiol 17-beta-dehydrogenase 11=Homo sapiens GN=HSD17B11 PE=1 SV=3	DHB11_HUMAN	1	2	3	3	0.08
Ezrin=Homo sapiens GN=EZR PE=1 SV=4	EZRI_HUMAN	1	17	29	98	0.456
Antileukoproteinase=Homo sapiens GN=SLPI PE=1 SV=2	SLPI_HUMAN	1	5	6	9	0.394
Vesicle-associated membrane protein-associated protein A=Homo sapiens GN=VAPA PE=1 SV=3	VAPA_HUMAN	1	3	6	25	0.193
UDP-glucuronic acid decarboxylase 1=Homo sapiens GN=UXS1 PE=1 SV=1	UXS1_HUMAN	1	3	5	9	0.133
Syntaxin-binding protein 3=Homo sapiens GN=STXBP3 PE=1 SV=2	STXB3_HUMAN	1	9	11	16	0.226
Transmembrane 9 superfamily member 2=Homo sapiens GN=TM9SF2 PE=1 SV=1	TM9S2_HUMAN	1	5	6	11	0.116
Transitional endoplasmic reticulum ATPase=Homo sapiens GN=VCP PE=1 SV=4	TERA_HUMAN	1	3	4	9	0.0521
Anoctamin-1=Homo sapiens GN=ANO1 PE=1 SV=1	ANO1_HUMAN	1	4	4	4	0.0345
Endoplasmin=Homo sapiens GN=HSP90B1 PE=1 SV=1	ENPL_HUMAN	1	28	36	79	0.461
Receptor-type tyrosine-protein phosphatase eta=Homo sapiens GN=PTPRJ PE=1 SV=3	PTPRJ_HUMAN	1	7	7	7	0.0748
T-complex protein 1 subunit gamma=Homo sapiens GN=CCT3 PE=1 SV=4	TCPG_HUMAN	1	2	2	2	0.0679
Sphingosine-1-phosphate lyase 1=Homo sapiens GN=SGPL1 PE=1 SV=3	SGPL1_HUMAN	1	2	3	4	0.0528
Alpha-1,6-mannosylglycoprotein 6-beta-N-acetylglucosaminyltransferase A=Homo sapiens GN=MGAT5 PE=1 SV=1	MGT5A_HUMAN	1	2	3	3	0.0324
Ig gamma-4 chain C region=Homo sapiens GN=IGHG4 PE=1 SV=1	IGHG4_HUMAN	1	1	1	1	0.0306
CD109 antigen=Homo sapiens GN=CD109 PE=1 SV=2	CD109_HUMAN	1	3	3	5	0.0353
Mesencephalic astrocyte-derived neurotrophic factor=Homo sapiens GN=MANF PE=1 SV=3	MANF_HUMAN	1	3	3	3	0.137
Nodal modulator 1=Homo sapiens GN=NOMO1 PE=1 SV=5	NOMO1_HUMAN	1	1	1	12	0.0884
Syntaxin-7=Homo sapiens GN=STX7 PE=1 SV=4	STX7_HUMAN	1	3	3	3	0.142
60S ribosomal protein L38=Homo sapiens GN=RPL38 PE=1 SV=2	RL38_HUMAN	1	2	3	4	0.329
Leucine-rich repeat-containing protein 59=Homo sapiens GN=LRRC59 PE=1 SV=1	LRC59_HUMAN	1	9	12	33	0.388
Syntaxin-6=Homo sapiens GN=STX6 PE=1 SV=1	STX6_HUMAN	1	2	2	2	0.125
L-lactate dehydrogenase B chain=Homo sapiens GN=LDHB PE=1 SV=2	LDHB_HUMAN	1	7	8	13	0.311
Kunitz-type protease inhibitor 2=Homo sapiens GN=SPINT2 PE=1 SV=2	SPIT2_HUMAN	1	2	2	2	0.103
Ras-related protein Ral-A=Homo sapiens GN=RALA PE=1 SV=1	RALA_HUMAN	1	7	8	14	0.587
Aspartate aminotransferase, mitochondrial=Homo sapiens GN=GOT2 PE=1 SV=3	AATM_HUMAN	1	3	3	3	0.086
Cytochrome b5 type B=Homo sapiens GN=CYB5B PE=1 SV=2	CYB5B_HUMAN	1	3	3	5	0.377
Dolichol-phosphate mannosyltransferase=Homo sapiens GN=DPM1 PE=1 SV=1	DPM1_HUMAN	1	3	3	5	0.173
CD81 antigen=Homo sapiens GN=CD81 PE=1 SV=1	CD81_HUMAN	1	3	6	12	0.25
Endothelin-converting enzyme 1=Homo sapiens GN=ECE1 PE=1 SV=2	ECE1_HUMAN	1	2	2	2	0.0494
Alpha-galactosidase A=Homo sapiens GN=GLA PE=1 SV=1	AGAL_HUMAN	1	4	4	4	0.135
V-type proton ATPase subunit H=Homo sapiens GN=ATP6V1H PE=1 SV=1	VATH_HUMAN	1	1	1	1	0.0435
Ragulator complex protein LAMTOR4=Homo sapiens GN=LAMTOR4 PE=1 SV=1	LTOR4_HUMAN	1	1	1	1	0.434
14-3-3 protein zeta/delta=Homo sapiens GN=YWHAZ PE=1 SV=1	1433Z_HUMAN	1	2	2	7	0.237
Tubulin beta chain=Homo sapiens GN=TUBB PE=1 SV=2	TBB5_HUMAN	1	2	2	15	0.378
Plexin-B2=Homo sapiens GN=PLXNB2 PE=1 SV=3	PLXB2_HUMAN	1	10	11	19	0.0909
Lysosome-associated membrane glycoprotein 1=Homo sapiens GN=LAMP1 PE=1 SV=3	LAMP1_HUMAN	1	5	7	23	0.118
Lysosomal acid phosphatase=Homo sapiens GN=ACP2 PE=1 SV=3	PPAL_HUMAN	1	1	1	1	0.0331
Guanine nucleotide-binding protein subunit alpha-11=Homo sapiens GN=GNA11 PE=1 SV=2	GNA11_HUMAN	1	3	5	21	0.273
60S ribosomal protein L15=Homo sapiens GN=RPL15 PE=1 SV=2	RL15_HUMAN	1	3	4	8	0.172
AP-2 complex subunit alpha-1=Homo sapiens GN=AP2A1 PE=1 SV=3	AP2A1_HUMAN	1	3	3	8	0.105
BPI fold-containing family B member 4=Homo sapiens GN=BPIFB4 PE=2 SV=2	BPIB4_HUMAN	1	2	2	2	0.0668
Alpha-enolase=Homo sapiens GN=ENO1 PE=1 SV=2	ENOA_HUMAN	1	11	11	14	0.376
Elongation factor 1-gamma=Homo sapiens GN=EEF1G PE=1 SV=3	EF1G_HUMAN	1	3	3	4	0.0915
Lysosomal acid lipase/cholesteryl ester hydrolase=Homo sapiens GN=LIPA PE=1 SV=2	LICH_HUMAN	1	4	4	5	0.18
Ras-related protein Rap-1b-like protein=Homo sapiens PE=2 SV=1	RP1BL_HUMAN	1	1	1	23	0.56
Filamin-A=Homo sapiens GN=FLNA PE=1 SV=4	FLNA_HUMAN	1	49	53	85	0.294
Protein S100-A11=Homo sapiens GN=S100A11 PE=1 SV=2	S10AB_HUMAN	1	8	15	73	0.867
Ras-related protein Rab-5C=Homo sapiens GN=RAB5C PE=1 SV=2	RAB5C_HUMAN	1	5	7	30	0.481
40S ribosomal protein S5=Homo sapiens GN=RPS5 PE=1 SV=4	RS5_HUMAN	1	3	4	10	0.186
Integrin alpha-6=Homo sapiens GN=ITGA6 PE=1 SV=4	ITA6_HUMAN	1	19	22	35	0.235
Triosephosphate isomerase=Homo sapiens GN=TPI1 PE=1 SV=3	TPIS_HUMAN	1	2	2	2	0.0804
Guanine nucleotide-binding protein G(k) subunit alpha=Homo sapiens GN=GNAI3 PE=1 SV=3	GNAI3_HUMAN	1	8	13	65	0.548
ER membrane protein complex subunit 2=Homo sapiens GN=EMC2 PE=1 SV=1	EMC2_HUMAN	1	3	3	3	0.148
Epoxide hydrolase 1=Homo sapiens GN=EPHX1 PE=1 SV=1	HYEP_HUMAN	1	2	2	4	0.0835
Coronin-1B=Homo sapiens GN=CORO1B PE=1 SV=1	COR1B_HUMAN	1	2	2	2	0.0716
Rho-related GTP-binding protein RhoG=Homo sapiens GN=RHOG PE=1 SV=1	RHOG_HUMAN	1	2	2	3	0.236
ER membrane protein complex subunit 1=Homo sapiens GN=EMC1 PE=1 SV=1	EMC1_HUMAN	1	3	3	4	0.0493
X-ray repair cross-complementing protein 6=Homo sapiens GN=XRCC6 PE=1 SV=2	XRCC6_HUMAN	1	1	1	1	0.0361
2',3'-cyclic-nucleotide 3'-phosphodiesterase=Homo sapiens GN=CNP PE=1 SV=2	CN37_HUMAN	1	13	14	25	0.428
Epididymal secretory protein E1=Homo sapiens GN=NPC2 PE=1 SV=1	NPC2_HUMAN	1	8	13	43	0.517
V-type proton ATPase 116 kDa subunit a isoform 1=Homo sapiens GN=ATP6V0A1 PE=1 SV=3	VPP1_HUMAN	1	3	3	3	0.0597
Multidrug resistance-associated protein 1=Homo sapiens GN=ABCC1 PE=1 SV=3	MRP1_HUMAN	1	6	6	7	0.0699
60S ribosomal protein L18a=Homo sapiens GN=RPL18A PE=1 SV=2	RL18A_HUMAN	1	3	3	3	0.182
Cofilin-1=Homo sapiens GN=CFL1 PE=1 SV=3	COF1_HUMAN	1	5	7	14	0.506
Gamma-glutamyl hydrolase=Homo sapiens GN=GGH PE=1 SV=2	GGH_HUMAN	1	9	15	36	0.39
Microtubule-associated proteins 1A/1B light chain 3B=Homo sapiens GN=MAP1LC3B PE=1 SV=3	MLP3B_HUMAN	1	1	1	2	0.112
High affinity cationic amino acid transporter 1=Homo sapiens GN=SLC7A1 PE=1 SV=1	CTR1_HUMAN	1	6	6	9	0.135
Sodium/myo-inositol cotransporter=Homo sapiens GN=SLC5A3 PE=3 SV=2	SC5A3_HUMAN	1	11	16	61	0.221
UDP-glucose:glycoprotein glucosyltransferase 1=Homo sapiens GN=UGGT1 PE=1 SV=3	UGGG1_HUMAN	1	9	10	18	0.107
Estradiol 17-beta-dehydrogenase 12=Homo sapiens GN=HSD17B12 PE=1 SV=2	DHB12_HUMAN	1	6	7	21	0.282
14-3-3 protein theta=Homo sapiens GN=YWHAQ PE=1 SV=1	1433T_HUMAN	1	3	4	13	0.286
Protein LAP2=Homo sapiens GN=ERBB2IP PE=1 SV=2	LAP2_HUMAN	1	3	3	3	0.0397
Proactivator polypeptide=Homo sapiens GN=PSAP PE=1 SV=2	SAP_HUMAN	1	10	13	53	0.202
Vesicle-associated membrane protein-associated protein B/C=Homo sapiens GN=VAPB PE=1 SV=3	VAPB_HUMAN	1	5	5	9	0.292
Tyrosine-protein kinase Yes=Homo sapiens GN=YES1 PE=1 SV=3	YES_HUMAN	1	7	8	20	0.28
Keratin, type II cytoskeletal 5=Homo sapiens GN=KRT5 PE=1 SV=3	K2C5_HUMAN	1	3	3	10	0.154
Tyrosine-protein phosphatase non-receptor type 1=Homo sapiens GN=PTPN1 PE=1 SV=1	PTN1_HUMAN	1	9	9	10	0.329
Signal peptidase complex catalytic subunit SEC11A=Homo sapiens GN=SEC11A PE=1 SV=1	SC11A_HUMAN	1	3	3	3	0.112
Proliferation-associated protein 2G4=Homo sapiens GN=PA2G4 PE=1 SV=3	PA2G4_HUMAN	1	6	6	7	0.259
Transmembrane 9 superfamily member 3=Homo sapiens GN=TM9SF3 PE=1 SV=2	TM9S3_HUMAN	1	6	7	13	0.129
Inactive tyrosine-protein kinase 7=Homo sapiens GN=PTK7 PE=1 SV=2	PTK7_HUMAN	1	5	6	10	0.0654
T-complex protein 1 subunit eta=Homo sapiens GN=CCT7 PE=1 SV=2	TCPH_HUMAN	1	6	7	9	0.158
CD276 antigen=Homo sapiens GN=CD276 PE=1 SV=1	CD276_HUMAN	1	2	2	2	0.0749
Nodal modulator 2=Homo sapiens GN=NOMO2 PE=1 SV=1	NOMO2_HUMAN	1	1	1	12	0.0987
Alpha-mannosidase 2=Homo sapiens GN=MAN2A1 PE=1 SV=2	MA2A1_HUMAN	1	11	11	12	0.139
Golgin subfamily A member 7=Homo sapiens GN=GOLGA7 PE=1 SV=2	GOGA7_HUMAN	1	2	3	4	0.168
14-3-3 protein epsilon=Homo sapiens GN=YWHAE PE=1 SV=1	1433E_HUMAN	1	4	5	9	0.282
X-ray repair cross-complementing protein 5=Homo sapiens GN=XRCC5 PE=1 SV=3	XRCC5_HUMAN	1	2	2	2	0.0601
Retinol dehydrogenase 11=Homo sapiens GN=RDH11 PE=1 SV=2	RDH11_HUMAN	1	5	5	5	0.211
Galectin-3=Homo sapiens GN=LGALS3 PE=1 SV=5	LEG3_HUMAN	1	3	3	4	0.148
Endoplasmic reticulum resident protein 29=Homo sapiens GN=ERP29 PE=1 SV=4	ERP29_HUMAN	1	5	5	10	0.272
Protein lin-7 homolog C=Homo sapiens GN=LIN7C PE=1 SV=1	LIN7C_HUMAN	1	3	3	6	0.147
Actin, cytoplasmic 1=Homo sapiens GN=ACTB PE=1 SV=1	ACTB_HUMAN	1	8	14	191	0.715
CD59 glycoprotein=Homo sapiens GN=CD59 PE=1 SV=1	CD59_HUMAN	1	3	5	7	0.25
ADP-ribosylation factor 4=Homo sapiens GN=ARF4 PE=1 SV=3	ARF4_HUMAN	1	2	2	2	0.111
40S ribosomal protein S6=Homo sapiens GN=RPS6 PE=1 SV=1	RS6_HUMAN	1	2	2	4	0.0964
60S ribosomal protein L17=Homo sapiens GN=RPL17 PE=1 SV=3	RL17_HUMAN	1	2	2	3	0.109
Lysosome-associated membrane glycoprotein 2=Homo sapiens GN=LAMP2 PE=1 SV=2	LAMP2_HUMAN	1	2	2	4	0.0415
Alpha-N-acetylglucosaminidase=Homo sapiens GN=NAGLU PE=1 SV=2	ANAG_HUMAN	1	2	2	2	0.0444
AP-2 complex subunit alpha-2=Homo sapiens GN=AP2A2 PE=1 SV=2	AP2A2_HUMAN	1	5	6	12	0.17
Heterogeneous nuclear ribonucleoprotein K=Homo sapiens GN=HNRNPK PE=1 SV=1	HNRPK_HUMAN	1	2	2	2	0.0864
AP-2 complex subunit mu=Homo sapiens GN=AP2M1 PE=1 SV=2	AP2M1_HUMAN	1	5	5	6	0.156
Filamin-B=Homo sapiens GN=FLNB PE=1 SV=2	FLNB_HUMAN	1	44	48	80	0.253
Cytoskeleton-associated protein 4=Homo sapiens GN=CKAP4 PE=1 SV=2	CKAP4_HUMAN	1	5	6	6	0.098
Cell adhesion molecule 1=Homo sapiens GN=CADM1 PE=1 SV=2	CADM1_HUMAN	1	2	2	2	0.0837
60S ribosomal protein L7a=Homo sapiens GN=RPL7A PE=1 SV=2	RL7A_HUMAN	1	7	8	8	0.308
ATP-binding cassette sub-family D member 3=Homo sapiens GN=ABCD3 PE=1 SV=1	ABCD3_HUMAN	1	3	3	5	0.0819
Coronin-1C=Homo sapiens GN=CORO1C PE=1 SV=1	COR1C_HUMAN	1	8	10	12	0.251
Septin-9=Homo sapiens GN=SEPT9 PE=1 SV=2	SEPT9_HUMAN	1	7	7	7	0.148
Transmembrane emp24 domain-containing protein 4=Homo sapiens GN=TMED4 PE=1 SV=1	TMED4_HUMAN	1	2	2	5	0.15
Pyruvate kinase isozymes M1/M2=Homo sapiens GN=PKM PE=1 SV=4	KPYM_HUMAN	1	11	11	14	0.318
Mitochondrial inner membrane protein=Homo sapiens GN=IMMT PE=1 SV=1	IMMT_HUMAN	1	1	1	1	0.0172
Stomatin-like protein 2, mitochondrial=Homo sapiens GN=STOML2 PE=1 SV=1	STML2_HUMAN	1	3	3	4	0.208
V-type proton ATPase 116 kDa subunit a isoform 2=Homo sapiens GN=ATP6V0A2 PE=1 SV=2	VPP2_HUMAN	1	2	2	3	0.0292
Coxsackievirus and adenovirus receptor=Homo sapiens GN=CXADR PE=1 SV=1	CXAR_HUMAN	1	9	9	13	0.323
Neutral amino acid transporter A=Homo sapiens GN=SLC1A4 PE=1 SV=1	SATT_HUMAN	1	2	2	3	0.0451
Catenin delta-1=Homo sapiens GN=CTNND1 PE=1 SV=1	CTND1_HUMAN	1	2	2	3	0.03
Transducin beta-like protein 2=Homo sapiens GN=TBL2 PE=1 SV=1	TBL2_HUMAN	1	3	3	3	0.0671
Guanine nucleotide-binding protein G(I)/G(S)/G(T) subunit beta-1=Homo sapiens GN=GNB1 PE=1 SV=3	GBB1_HUMAN	1	7	10	54	0.426
Endothelial protein C receptor=Homo sapiens GN=PROCR PE=1 SV=1	EPCR_HUMAN	1	2	3	3	0.109
Syntaxin-5=Homo sapiens GN=STX5 PE=1 SV=2	STX5_HUMAN	1	2	2	2	0.101
Probable phospholipid-transporting ATPase IG=Homo sapiens GN=ATP11C PE=1 SV=3	AT11C_HUMAN	1	4	4	4	0.0716
Hippocalcin-like protein 1=Homo sapiens GN=HPCAL1 PE=1 SV=3	HPCL1_HUMAN	1	2	2	4	0.104
5'-nucleotidase=Homo sapiens GN=NT5E PE=1 SV=1	5NTD_HUMAN	1	8	10	18	0.247
Voltage-dependent anion-selective channel protein 1=Homo sapiens GN=VDAC1 PE=1 SV=2	VDAC1_HUMAN	1	12	16	34	0.548
LIM and SH3 domain protein 1=Homo sapiens GN=LASP1 PE=1 SV=2	LASP1_HUMAN	1	5	5	7	0.261
Disintegrin and metalloproteinase domain-containing protein 10=Homo sapiens GN=ADAM10 PE=1 SV=1	ADA10_HUMAN	1	2	2	2	0.016
Transmembrane 9 superfamily member 4=Homo sapiens GN=TM9SF4 PE=1 SV=2	TM9S4_HUMAN	1	5	8	18	0.104
Unconventional myosin-Ib=Homo sapiens GN=MYO1B PE=1 SV=3	MYO1B_HUMAN	1	5	6	7	0.0924
Protein XRP2=Homo sapiens GN=RP2 PE=1 SV=4	XRP2_HUMAN	1	2	2	2	0.0514
Keratin, type II cytoskeletal 6A=Homo sapiens GN=KRT6A PE=1 SV=3	K2C6A_HUMAN	1	2	2	10	0.161
40S ribosomal protein S2=Homo sapiens GN=RPS2 PE=1 SV=2	RS2_HUMAN	1	6	6	10	0.253
Transmembrane emp24 domain-containing protein 7=Homo sapiens GN=TMED7 PE=1 SV=2	TMED7_HUMAN	1	5	5	10	0.33
Beta-galactosidase-1-like protein 2=Homo sapiens GN=GLB1L2 PE=2 SV=1	GLBL2_HUMAN	1	6	6	8	0.157
14-3-3 protein gamma=Homo sapiens GN=YWHAG PE=1 SV=2	1433G_HUMAN	1	5	6	10	0.385
NADH-cytochrome b5 reductase 3=Homo sapiens GN=CYB5R3 PE=1 SV=3	NB5R3_HUMAN	1	3	3	3	0.193
Sodium/potassium-transporting ATPase subunit alpha-1=Homo sapiens GN=ATP1A1 PE=1 SV=1	AT1A1_HUMAN	1	25	34	188	0.44
Monocarboxylate transporter 1=Homo sapiens GN=SLC16A1 PE=1 SV=3	MOT1_HUMAN	1	7	10	22	0.194
C-1-tetrahydrofolate synthase, cytoplasmic=Homo sapiens GN=MTHFD1 PE=1 SV=3	C1TC_HUMAN	1	2	2	2	0.0406
Membrane-associated progesterone receptor component 1=Homo sapiens GN=PGRMC1 PE=1 SV=3	PGRC1_HUMAN	1	5	5	7	0.364
Adenylate kinase 2, mitochondrial=Homo sapiens GN=AK2 PE=1 SV=2	KAD2_HUMAN	1	4	5	9	0.247
Dipeptidyl peptidase 1=Homo sapiens GN=CTSC PE=1 SV=2	CATC_HUMAN	1	9	13	36	0.326
Protein FAM3C=Homo sapiens GN=FAM3C PE=1 SV=1	FAM3C_HUMAN	1	5	6	11	0.295
Protein transport protein Sec23B=Homo sapiens GN=SEC23B PE=1 SV=2	SC23B_HUMAN	1	1	1	5	0.0508
Cathepsin B=Homo sapiens GN=CTSB PE=1 SV=3	CATB_HUMAN	1	8	12	57	0.342
V-type proton ATPase subunit E 1=Homo sapiens GN=ATP6V1E1 PE=1 SV=1	VATE1_HUMAN	1	3	4	14	0.199
ADP-ribosylation factor 6=Homo sapiens GN=ARF6 PE=1 SV=2	ARF6_HUMAN	1	1	1	1	0.0629
Basigin=Homo sapiens GN=BSG PE=1 SV=2	BASI_HUMAN	1	9	16	46	0.348
Protein canopy homolog 2=Homo sapiens GN=CNPY2 PE=1 SV=1	CNPY2_HUMAN	1	3	4	7	0.258
UPF0556 protein C19orf10=Homo sapiens GN=C19orf10 PE=1 SV=1	CS010_HUMAN	1	2	2	2	0.139
Prostaglandin F2 receptor negative regulator=Homo sapiens GN=PTGFRN PE=1 SV=2	FPRP_HUMAN	1	7	7	7	0.0978
Protein disulfide-isomerase=Homo sapiens GN=P4HB PE=1 SV=3	PDIA1_HUMAN	1	18	24	59	0.451
Cell surface glycoprotein MUC18=Homo sapiens GN=MCAM PE=1 SV=2	MUC18_HUMAN	1	13	17	39	0.272
Calcium-transporting ATPase type 2C member 1=Homo sapiens GN=ATP2C1 PE=1 SV=3	AT2C1_HUMAN	1	3	4	7	0.049
BPI fold-containing family B member 1=Homo sapiens GN=BPIFB1 PE=2 SV=1	BPIB1_HUMAN	1	21	37	86	0.663
60S ribosomal protein L18=Homo sapiens GN=RPL18 PE=1 SV=2	RL18_HUMAN	1	3	3	6	0.191
Ras-related protein Rab-8A=Homo sapiens GN=RAB8A PE=1 SV=1	RAB8A_HUMAN	1	2	3	13	0.271
Protein tweety homolog 3=Homo sapiens GN=TTYH3 PE=1 SV=3	TTYH3_HUMAN	1	2	3	4	0.0421
Guanine nucleotide-binding protein subunit alpha-13=Homo sapiens GN=GNA13 PE=1 SV=2	GNA13_HUMAN	1	8	8	11	0.332
Glypican-1=Homo sapiens GN=GPC1 PE=1 SV=2	GPC1_HUMAN	1	6	6	7	0.158
40S ribosomal protein S12=Homo sapiens GN=RPS12 PE=1 SV=3	RS12_HUMAN	1	3	3	5	0.273
Multidrug resistance-associated protein 5=Homo sapiens GN=ABCC5 PE=1 SV=2	MRP5_HUMAN	0.999	1	1	1	0.0111
Protein kinase C alpha type=Homo sapiens GN=PRKCA PE=1 SV=4	KPCA_HUMAN	0.999	1	1	3	0.0417
Ras-related protein Rab-1A=Homo sapiens GN=RAB1A PE=1 SV=3	RAB1A_HUMAN	0.999	1	2	21	0.361
Ras-related protein Rap-2b=Homo sapiens GN=RAP2B PE=1 SV=1	RAP2B_HUMAN	0.999	1	1	3	0.268
Ras-related protein Rap-2c=Homo sapiens GN=RAP2C PE=1 SV=1	RAP2C_HUMAN	0.999	1	1	4	0.268
Mucin-7=Homo sapiens GN=MUC7 PE=1 SV=2	MUC7_HUMAN	0.999	1	1	2	0.0265
Ras-related protein Rab-22A=Homo sapiens GN=RAB22A PE=1 SV=2	RB22A_HUMAN	0.999	1	1	2	0.165
Dolichyl-phosphate beta-glucosyltransferase=Homo sapiens GN=ALG5 PE=1 SV=1	ALG5_HUMAN	0.999	1	1	1	0.0463
ADP-ribosylation factor-like protein 8A=Homo sapiens GN=ARL8A PE=1 SV=1	ARL8A_HUMAN	0.999	1	1	10	0.371
ER lumen protein retaining receptor 3=Homo sapiens GN=KDELR3 PE=2 SV=1	ERD23_HUMAN	0.999	1	1	1	0.0421
26S proteasome non-ATPase regulatory subunit 2=Homo sapiens GN=PSMD2 PE=1 SV=3	PSMD2_HUMAN	0.999	1	1	1	0.0209
Keratin, type I cytoskeletal 16=Homo sapiens GN=KRT16 PE=1 SV=4	K1C16_HUMAN	0.999	1	1	6	0.152
Translational activator GCN1=Homo sapiens GN=GCN1L1 PE=1 SV=6	GCN1L_HUMAN	0.999	1	1	1	0.00599
Serine/threonine-protein phosphatase PP1-beta catalytic subunit=Homo sapiens GN=PPP1CB PE=1 SV=3	PP1B_HUMAN	0.999	1	1	19	0.312
Trifunctional enzyme subunit alpha, mitochondrial=Homo sapiens GN=HADHA PE=1 SV=2	ECHA_HUMAN	0.999	1	1	1	0.0197
40S ribosomal protein S27=Homo sapiens GN=RPS27 PE=1 SV=3	RS27_HUMAN	0.999	1	1	2	0.286
Syntaxin-3=Homo sapiens GN=STX3 PE=1 SV=3	STX3_HUMAN	0.999	1	1	1	0.0311
Erlin-1=Homo sapiens GN=ERLIN1 PE=1 SV=1	ERLN1_HUMAN	0.999	1	1	2	0.0838
Actin, alpha cardiac muscle 1=Homo sapiens GN=ACTC1 PE=1 SV=1	ACTC_HUMAN	0.999	1	3	93	0.361
1-phosphatidylinositol 4,5-bisphosphate phosphodiesterase delta-3=Homo sapiens GN=PLCD3 PE=1 SV=3	PLCD3_HUMAN	0.999	1	1	1	0.0292
Tubulin alpha-4A chain=Homo sapiens GN=TUBA4A PE=1 SV=1	TBA4A_HUMAN	0.999	1	1	17	0.096
39S ribosomal protein L12, mitochondrial=Homo sapiens GN=MRPL12 PE=1 SV=2	RM12_HUMAN	0.999	1	1	1	0.121
60S ribosomal protein L35a=Homo sapiens GN=RPL35A PE=1 SV=2	RL35A_HUMAN	0.999	1	1	1	0.0727
HLA class I histocompatibility antigen, B-41 alpha chain=Homo sapiens GN=HLA-B PE=1 SV=1	1B41_HUMAN	0.999	1	1	10	0.155
Apolipoprotein B-100=Homo sapiens GN=APOB PE=1 SV=2	APOB_HUMAN	0.999	1	1	2	0.00241
Serine palmitoyltransferase 2=Homo sapiens GN=SPTLC2 PE=1 SV=1	SPTC2_HUMAN	0.998	1	1	1	0.0356
Protein kinase C delta type=Homo sapiens GN=PRKCD PE=1 SV=2	KPCD_HUMAN	0.998	1	1	1	0.0178
Very-long-chain (3R)-3-hydroxyacyl-[acyl-carrier protein] dehydratase 3=Homo sapiens GN=PTPLAD1 PE=1 SV=2	HACD3_HUMAN	0.998	1	1	2	0.058
60S ribosomal protein L8=Homo sapiens GN=RPL8 PE=1 SV=2	RL8_HUMAN	0.998	1	1	1	0.0428
ATP-dependent RNA helicase DDX3X=Homo sapiens GN=DDX3X PE=1 SV=3	DDX3X_HUMAN	0.998	1	1	2	0.0181
Deleted in autism protein 1=Homo sapiens GN=C3orf58 PE=2 SV=1	DIA1_HUMAN	0.998	1	1	1	0.0186
Dystroglycan=Homo sapiens GN=DAG1 PE=1 SV=2	DAG1_HUMAN	0.998	1	1	1	0.0145
E3 UFM1-protein ligase 1=Homo sapiens GN=UFL1 PE=1 SV=2	UFL1_HUMAN	0.998	1	1	1	0.0252
Palmitoyltransferase ZDHHC13=Homo sapiens GN=ZDHHC13 PE=2 SV=3	ZDH13_HUMAN	0.998	1	1	1	0.0193
Transient receptor potential cation channel subfamily V member 2=Homo sapiens GN=TRPV2 PE=1 SV=1	TRPV2_HUMAN	0.998	1	1	1	0.0144
Tripartite motif-containing protein 14=Homo sapiens GN=TRIM14 PE=2 SV=2	TRI14_HUMAN	0.998	1	1	1	0.0226
T-complex protein 1 subunit beta=Homo sapiens GN=CCT2 PE=1 SV=4	TCPB_HUMAN	0.998	1	1	1	0.028
Tyrosine-protein kinase Fyn=Homo sapiens GN=FYN PE=1 SV=3	FYN_HUMAN	0.998	1	2	10	0.0987
Eosinophil peroxidase=Homo sapiens GN=EPX PE=1 SV=2	PERE_HUMAN	0.998	1	1	1	0.0196
40S ribosomal protein S28=Homo sapiens GN=RPS28 PE=1 SV=1	RS28_HUMAN	0.998	1	1	1	0.13
Ras-related protein Rab-5B=Homo sapiens GN=RAB5B PE=1 SV=1	RAB5B_HUMAN	0.998	1	1	10	0.163
3-ketoacyl-CoA thiolase, peroxisomal=Homo sapiens GN=ACAA1 PE=1 SV=2	THIK_HUMAN	0.998	1	1	1	0.0495
Alpha-catulin=Homo sapiens GN=CTNNAL1 PE=1 SV=2	CTNL1_HUMAN	0.998	1	1	2	0.0272
Sortilin-related receptor=Homo sapiens GN=SORL1 PE=1 SV=2	SORL_HUMAN	0.997	1	1	1	0.00994
Keratin, type II cytoskeletal 2 epidermal=Homo sapiens GN=KRT2 PE=1 SV=2	K22E_HUMAN	0.997	1	1	6	0.0767
60S ribosomal protein L34=Homo sapiens GN=RPL34 PE=1 SV=3	RL34_HUMAN	0.997	1	1	1	0.0684
Heparan sulfate 2-O-sulfotransferase 1=Homo sapiens GN=HS2ST1 PE=1 SV=1	HS2ST_HUMAN	0.997	1	1	1	0.0225
Chitobiosyldiphosphodolichol beta-mannosyltransferase=Homo sapiens GN=ALG1 PE=1 SV=2	ALG1_HUMAN	0.996	1	1	1	0.0194
Protein transport protein Sec23A=Homo sapiens GN=SEC23A PE=1 SV=2	SC23A_HUMAN	0.996	1	1	4	0.0641
Hydroxyacyl-coenzyme A dehydrogenase, mitochondrial=Homo sapiens GN=HADH PE=1 SV=3	HCDH_HUMAN	0.996	1	1	1	0.0955
Proline-rich protein 4=Homo sapiens GN=PRR4 PE=1 SV=3	PROL4_HUMAN	0.995	1	1	1	0.0597
Eukaryotic initiation factor 4A-II=Homo sapiens GN=EIF4A2 PE=1 SV=2	IF4A2_HUMAN	0.995	1	1	3	0.113
Zinc transporter ZIP10=Homo sapiens GN=SLC39A10 PE=1 SV=2	S39AA_HUMAN	0.994	1	1	2	0.00963
Integrin alpha-9=Homo sapiens GN=ITGA9 PE=1 SV=2	ITA9_HUMAN	0.994	1	1	2	0.0135
Amyloid beta A4 protein=Homo sapiens GN=APP PE=1 SV=3	A4_HUMAN	0.993	1	1	1	0.0169
Microsomal glutathione S-transferase 2=Homo sapiens GN=MGST2 PE=1 SV=1	MGST2_HUMAN	0.993	1	1	2	0.0952
Cleft lip and palate transmembrane protein 1=Homo sapiens GN=CLPTM1 PE=1 SV=1	CLPT1_HUMAN	0.993	1	1	2	0.0149
Phospholipase D2=Homo sapiens GN=PLD2 PE=1 SV=2	PLD2_HUMAN	0.993	1	1	1	0.0204
Ectonucleotide pyrophosphatase/phosphodiesterase family member 4=Homo sapiens GN=ENPP4 PE=2 SV=3	ENPP4_HUMAN	0.992	0	0	1	0.0221
Heat shock 70 kDa protein 1A/1B=Homo sapiens GN=HSPA1A PE=1 SV=5	HSP71_HUMAN	0.991	1	1	3	0.0562
14-3-3 protein sigma=Homo sapiens GN=SFN PE=1 SV=1	1433S_HUMAN	0.99	1	1	5	0.169
Membrane-associated progesterone receptor component 2=Homo sapiens GN=PGRMC2 PE=1 SV=1	PGRC2_HUMAN	0.989	1	1	1	0.0628
Plasma alpha-L-fucosidase=Homo sapiens GN=FUCA2 PE=1 SV=2	FUCO2_HUMAN	0.988	1	1	1	0.0236
Heat shock 70 kDa protein 6=Homo sapiens GN=HSPA6 PE=1 SV=2	HSP76_HUMAN	0.987	1	1	3	0.0373
3-hydroxyacyl-CoA dehydrogenase type-2=Homo sapiens GN=HSD17B10 PE=1 SV=3	HCD2_HUMAN	0.986	1	1	1	0.0766
Cytoplasmic FMR1-interacting protein 1=Homo sapiens GN=CYFIP1 PE=1 SV=1	CYFP1_HUMAN	0.985	1	1	1	0.00958
Putative heat shock protein HSP 90-beta 4=Homo sapiens GN=HSP90AB4P PE=5 SV=1	H90B4_HUMAN	0.985	1	1	3	0.0713
Peroxiredoxin-2=Homo sapiens GN=PRDX2 PE=1 SV=5	PRDX2_HUMAN	0.982	1	1	3	0.096
Mitochondrial import receptor subunit TOM40 homolog=Homo sapiens GN=TOMM40 PE=1 SV=1	TOM40_HUMAN	0.982	1	1	1	0.0471
Delta(3,5)-Delta(2,4)-dienoyl-CoA isomerase, mitochondrial=Homo sapiens GN=ECH1 PE=1 SV=2	ECH1_HUMAN	0.968	1	1	1	0.0579
KDEL motif-containing protein 2=Homo sapiens GN=KDELC2 PE=1 SV=2	KDEL2_HUMAN	0.968	1	1	2	0.0178
UBX domain-containing protein 4=Homo sapiens GN=UBXN4 PE=1 SV=2	UBXN4_HUMAN	0.968	1	1	2	0.0276
Actin-related protein 2=Homo sapiens GN=ACTR2 PE=1 SV=1	ARP2_HUMAN	0.968	1	1	1	0.0305
Nucleosome assembly protein 1-like 1=Homo sapiens GN=NAP1L1 PE=1 SV=1	NP1L1_HUMAN	0.968	1	1	2	0.0281
DDRGK domain-containing protein 1=Homo sapiens GN=DDRGK1 PE=1 SV=2	DDRGK_HUMAN	0.968	1	1	2	0.0541
Fragile X mental retardation syndrome-related protein 1=Homo sapiens GN=FXR1 PE=1 SV=3	FXR1_HUMAN	0.968	1	1	2	0.0225
Ras GTPase-activating protein-binding protein 2=Homo sapiens GN=G3BP2 PE=1 SV=2	G3BP2_HUMAN	0.968	1	1	1	0.027
Voltage-dependent anion-selective channel protein 3=Homo sapiens GN=VDAC3 PE=1 SV=1	VDAC3_HUMAN	0.968	1	1	1	0.0742
Dihydroxyacetone phosphate acyltransferase=Homo sapiens GN=GNPAT PE=1 SV=1	GNPAT_HUMAN	0.968	1	1	2	0.0191
Peptidyl-prolyl cis-trans isomerase FKBP10=Homo sapiens GN=FKBP10 PE=1 SV=1	FKB10_HUMAN	0.968	1	1	1	0.043
PRA1 family protein 3=Homo sapiens GN=ARL6IP5 PE=1 SV=1	PRAF3_HUMAN	0.968	1	1	2	0.101
Eukaryotic translation initiation factor 4 gamma 2=Homo sapiens GN=EIF4G2 PE=1 SV=1	IF4G2_HUMAN	0.968	1	1	1	0.011
Protein S100-A13=Homo sapiens GN=S100A13 PE=1 SV=1	S10AD_HUMAN	0.968	1	1	2	0.122
40S ribosomal protein S15=Homo sapiens GN=RPS15 PE=1 SV=2	RS15_HUMAN	0.968	1	1	3	0.152
Dolichyl-diphosphooligosaccharide--protein glycosyltransferase subunit DAD1=Homo sapiens GN=DAD1 PE=1 SV=3	DAD1_HUMAN	0.968	1	1	1	0.0885
Sulfatase-modifying factor 2=Homo sapiens GN=SUMF2 PE=1 SV=2	SUMF2_HUMAN	0.968	1	1	2	0.0332
Calcium-binding mitochondrial carrier protein Aralar2=Homo sapiens GN=SLC25A13 PE=1 SV=2	CMC2_HUMAN	0.968	1	1	1	0.0252
Transmembrane protein 43=Homo sapiens GN=TMEM43 PE=1 SV=1	TMM43_HUMAN	0.968	1	1	1	0.0375
Mitochondrial import receptor subunit TOM70=Homo sapiens GN=TOMM70A PE=1 SV=1	TOM70_HUMAN	0.968	1	1	1	0.0296
40S ribosomal protein S17-like=Homo sapiens GN=RPS17L PE=2 SV=1	RS17L_HUMAN	0.968	1	1	1	0.0741
Mitochondrial-processing peptidase subunit alpha=Homo sapiens GN=PMPCA PE=1 SV=2	MPPA_HUMAN	0.968	1	1	1	0.0324
Torsin-1A-interacting protein 2=Homo sapiens GN=TOR1AIP2 PE=1 SV=1	TOIP2_HUMAN	0.968	1	1	1	0.0468
ATP-dependent RNA helicase DDX1=Homo sapiens GN=DDX1 PE=1 SV=2	DDX1_HUMAN	0.968	1	1	1	0.0284
Sorbitol dehydrogenase=Homo sapiens GN=SORD PE=1 SV=4	DHSO_HUMAN	0.968	1	1	1	0.0252
Glutaminase kidney isoform, mitochondrial=Homo sapiens GN=GLS PE=1 SV=1	GLSK_HUMAN	0.968	1	1	1	0.0314
ATPase family AAA domain-containing protein 3A=Homo sapiens GN=ATAD3A PE=1 SV=2	ATD3A_HUMAN	0.968	1	1	1	0.0221
Importin subunit alpha-2=Homo sapiens GN=KPNA2 PE=1 SV=1	IMA2_HUMAN	0.968	1	1	1	0.0473
Programmed cell death 6-interacting protein=Homo sapiens GN=PDCD6IP PE=1 SV=1	PDC6I_HUMAN	0.968	1	1	1	0.0196
Caprin-1=Homo sapiens GN=CAPRIN1 PE=1 SV=2	CAPR1_HUMAN	0.968	1	1	1	0.0254
40S ribosomal protein S15a=Homo sapiens GN=RPS15A PE=1 SV=2	RS15A_HUMAN	0.968	1	1	2	0.0692
60S ribosomal protein L26=Homo sapiens GN=RPL26 PE=1 SV=1	RL26_HUMAN	0.968	1	1	3	0.0621
NADH dehydrogenase [ubiquinone] iron-sulfur protein 8, mitochondrial=Homo sapiens GN=NDUFS8 PE=1 SV=1	NDUS8_HUMAN	0.968	1	1	1	0.0429
GPI transamidase component PIG-S=Homo sapiens GN=PIGS PE=1 SV=3	PIGS_HUMAN	0.968	1	1	1	0.0252
Striatin=Homo sapiens GN=STRN PE=1 SV=4	STRN_HUMAN	0.968	1	1	1	0.0231
Translocation protein SEC63 homolog=Homo sapiens GN=SEC63 PE=1 SV=2	SEC63_HUMAN	0.968	1	1	1	0.0118
Prolactin regulatory element-binding protein=Homo sapiens GN=PREB PE=1 SV=2	PREB_HUMAN	0.968	1	1	2	0.0647
40S ribosomal protein S21=Homo sapiens GN=RPS21 PE=1 SV=1	RS21_HUMAN	0.968	1	1	1	0.108
Thioredoxin domain-containing protein 12=Homo sapiens GN=TXNDC12 PE=1 SV=1	TXD12_HUMAN	0.968	1	1	2	0.0872
Ceramide synthase 2=Homo sapiens GN=CERS2 PE=1 SV=1	CERS2_HUMAN	0.968	1	1	1	0.0237
Acetolactate synthase-like protein=Homo sapiens GN=ILVBL PE=1 SV=2	ILVBL_HUMAN	0.968	1	1	2	0.0364
Metallothionein-2=Homo sapiens GN=MT2A PE=1 SV=1	MT2_HUMAN	0.968	1	1	1	0.197
G-rich sequence factor 1=Homo sapiens GN=GRSF1 PE=1 SV=3	GRSF1_HUMAN	0.968	1	1	1	0.0458
40S ribosomal protein S24=Homo sapiens GN=RPS24 PE=1 SV=1	RS24_HUMAN	0.968	1	1	2	0.0902
Neutral cholesterol ester hydrolase 1=Homo sapiens GN=NCEH1 PE=1 SV=3	NCEH1_HUMAN	0.968	1	1	1	0.0294
Heat shock protein beta-1=Homo sapiens GN=HSPB1 PE=1 SV=2	HSPB1_HUMAN	0.968	1	1	2	0.0488
Nicalin=Homo sapiens GN=NCLN PE=1 SV=2	NCLN_HUMAN	0.968	1	1	1	0.0249
Sorting nexin-3=Homo sapiens GN=SNX3 PE=1 SV=3	SNX3_HUMAN	0.968	1	1	2	0.0556
Extended synaptotagmin-2=Homo sapiens GN=ESYT2 PE=1 SV=1	ESYT2_HUMAN	0.968	1	1	1	0.013
Vinculin=Homo sapiens GN=VCL PE=1 SV=4	VINC_HUMAN	0.968	1	1	2	0.0185
Dehydrogenase/reductase SDR family member 7=Homo sapiens GN=DHRS7 PE=1 SV=1	DHRS7_HUMAN	0.968	1	1	1	0.0678
60S ribosomal protein L32=Homo sapiens GN=RPL32 PE=1 SV=2	RL32_HUMAN	0.968	1	1	1	0.0963
Proteasome subunit beta type-1=Homo sapiens GN=PSMB1 PE=1 SV=2	PSB1_HUMAN	0.968	1	1	2	0.0747
2-hydroxyacylsphingosine 1-beta-galactosyltransferase=Homo sapiens GN=UGT8 PE=2 SV=2	CGT_HUMAN	0.968	1	2	2	0.0277
Insulin-like growth factor 2 mRNA-binding protein 1=Homo sapiens GN=IGF2BP1 PE=1 SV=2	IF2B1_HUMAN	0.968	1	1	1	0.0277
Prolyl 3-hydroxylase 3=Homo sapiens GN=LEPREL2 PE=1 SV=1	P3H3_HUMAN	0.968	1	1	1	0.0272
Sterol-4-alpha-carboxylate 3-dehydrogenase, decarboxylating=Homo sapiens GN=NSDHL PE=1 SV=2	NSDHL_HUMAN	0.968	1	1	1	0.0483
60S ribosomal protein L35=Homo sapiens GN=RPL35 PE=1 SV=2	RL35_HUMAN	0.968	1	1	2	0.106
NADH dehydrogenase [ubiquinone] 1 alpha subcomplex subunit 9, mitochondrial=Homo sapiens GN=NDUFA9 PE=1 SV=2	NDUA9_HUMAN	0.968	1	1	1	0.0504
Macrophage migration inhibitory factor=Homo sapiens GN=MIF PE=1 SV=4	MIF_HUMAN	0.968	1	1	2	0.0783
Lanosterol synthase=Homo sapiens GN=LSS PE=1 SV=1	ERG7_HUMAN	0.968	1	1	1	0.0178
60S ribosomal protein L36=Homo sapiens GN=RPL36 PE=1 SV=3	RL36_HUMAN	0.968	1	1	1	0.105
Tumor protein D54=Homo sapiens GN=TPD52L2 PE=1 SV=2	TPD54_HUMAN	0.968	1	1	1	0.146
Transmembrane protein 109=Homo sapiens GN=TMEM109 PE=1 SV=1	TM109_HUMAN	0.968	1	1	2	0.0494
Signal peptidase complex subunit 3=Homo sapiens GN=SPCS3 PE=1 SV=1	SPCS3_HUMAN	0.968	1	1	2	0.05
Aldehyde dehydrogenase X, mitochondrial=Homo sapiens GN=ALDH1B1 PE=1 SV=3	AL1B1_HUMAN	0.968	1	1	1	0.0213
Proteasome activator complex subunit 2=Homo sapiens GN=PSME2 PE=1 SV=4	PSME2_HUMAN	0.968	1	1	1	0.0669
Acidic leucine-rich nuclear phosphoprotein 32 family member B=Homo sapiens GN=ANP32B PE=1 SV=1	AN32B_HUMAN	0.968	1	1	1	0.0518
Succinate dehydrogenase [ubiquinone] flavoprotein subunit, mitochondrial=Homo sapiens GN=SDHA PE=1 SV=2	DHSA_HUMAN	0.968	1	1	1	0.0211
ADP-ribosylation factor 1=Homo sapiens GN=ARF1 PE=1 SV=2	ARF1_HUMAN	0.968	1	1	1	0.0994
Trifunctional enzyme subunit beta, mitochondrial=Homo sapiens GN=HADHB PE=1 SV=3	ECHB_HUMAN	0.968	1	1	1	0.019
Serine/threonine-protein phosphatase 2A 65 kDa regulatory subunit A alpha isoform=Homo sapiens GN=PPP2R1A PE=1 SV=4	2AAA_HUMAN	0.968	1	1	1	0.039
Neuroblastoma-amplified sequence=Homo sapiens GN=NBAS PE=1 SV=2	NBAS_HUMAN	0.968	1	1	1	0.0059
BAG family molecular chaperone regulator 2=Homo sapiens GN=BAG2 PE=1 SV=1	BAG2_HUMAN	0.968	1	1	1	0.0521
Magnesium transporter protein 1=Homo sapiens GN=MAGT1 PE=1 SV=1	MAGT1_HUMAN	0.968	1	1	1	0.0299
40S ribosomal protein S10=Homo sapiens GN=RPS10 PE=1 SV=1	RS10_HUMAN	0.968	1	1	3	0.0545
60S ribosomal protein L23a=Homo sapiens GN=RPL23A PE=1 SV=1	RL23A_HUMAN	0.968	1	1	2	0.0833
F-actin-capping protein subunit alpha-1=Homo sapiens GN=CAPZA1 PE=1 SV=3	CAZA1_HUMAN	0.968	1	1	1	0.0629
Procollagen-lysine,2-oxoglutarate 5-dioxygenase 1=Homo sapiens GN=PLOD1 PE=1 SV=2	PLOD1_HUMAN	0.968	1	1	2	0.0206
MAGUK p55 subfamily member 5=Homo sapiens GN=MPP5 PE=1 SV=3	MPP5_HUMAN	0.968	1	1	1	0.0178
1-phosphatidylinositol 4,5-bisphosphate phosphodiesterase beta-3=Homo sapiens GN=PLCB3 PE=1 SV=2	PLCB3_HUMAN	0.968	1	1	2	0.0154
Importin-5=Homo sapiens GN=IPO5 PE=1 SV=4	IPO5_HUMAN	0.968	1	1	1	0.0182
28S ribosomal protein S6, mitochondrial=Homo sapiens GN=MRPS6 PE=1 SV=3	RT06_HUMAN	0.968	1	1	2	0.192
Multifunctional protein ADE2=Homo sapiens GN=PAICS PE=1 SV=3	PUR6_HUMAN	0.968	1	1	1	0.0353
Serum paraoxonase/arylesterase 2=Homo sapiens GN=PON2 PE=1 SV=3	PON2_HUMAN	0.968	1	1	1	0.0254
Mitochondrial import receptor subunit TOM5 homolog=Homo sapiens GN=TOMM5 PE=1 SV=1	TOM5_HUMAN	0.968	1	1	1	0.196
Serine hydroxymethyltransferase, mitochondrial=Homo sapiens GN=SHMT2 PE=1 SV=3	GLYM_HUMAN	0.968	1	1	1	0.0278
Obg-like ATPase 1=Homo sapiens GN=OLA1 PE=1 SV=2	OLA1_HUMAN	0.968	1	1	1	0.0379
Actin-related protein 2/3 complex subunit 2=Homo sapiens GN=ARPC2 PE=1 SV=1	ARPC2_HUMAN	0.968	1	1	1	0.0933
60S ribosomal protein L19=Homo sapiens GN=RPL19 PE=1 SV=1	RL19_HUMAN	0.968	1	1	1	0.0459
Protein S100-A16=Homo sapiens GN=S100A16 PE=1 SV=1	S10AG_HUMAN	0.968	1	2	3	0.184
Ancient ubiquitous protein 1=Homo sapiens GN=AUP1 PE=1 SV=1	AUP1_HUMAN	0.966	1	1	1	0.0252
Cytochrome c oxidase subunit 5A, mitochondrial=Homo sapiens GN=COX5A PE=1 SV=2	COX5A_HUMAN	0.966	1	1	1	0.2
